# Supplementary material for: Copper halide mediated synthesis of mesoionic 6-halo-[1,2,3]triazolo[5,1-a]isoquinoliums: further transformation to polyheterocycles
Source: Royal Society of Chemistry journal article supplement (doi:10.1039/d2qo01627c), 2022-01-01

**Copper halide mediated synthesis of mesoionic 6-halo-  
[1,2,3]triazolo[5,1-*a*]isoquinoliums: further transformation to  
polyheterocycles**

Yangang Wu, Wen Zhang, Xiaolong Pan, Chuanjun Song,\* Junbiao Chang\*

College of Chemistry, Zhengzhou University, Zhengzhou, Henan Province 450001, China

E-mail: chjsong@zzu.edu.cn; [changjunbiao@zzu.edu.cn](mailto:changjunbiao@zzu.edu.cn)

Table of Contents

|                                                                        |           |
|------------------------------------------------------------------------|-----------|
| <b>1. General Information .....</b>                                    | <b>2</b>  |
| <b>2. Synthesis and analytical data of compounds 1 .....</b>           | <b>2</b>  |
| <b>3. Synthesis and analytical data of compounds 2 .....</b>           | <b>12</b> |
| <b>4. Analytical data of compound 3aa .....</b>                        | <b>22</b> |
| <b>5. Synthesis and analytical data of compounds 4 .....</b>           | <b>22</b> |
| <b>6. Synthesis and analytical data of compounds 5 and 6 .....</b>     | <b>23</b> |
| <b>7. Synthesis and analytical data of compounds 7a–7c .....</b>       | <b>24</b> |
| <b>8. Control experiment to elucidate the reaction mechanism .....</b> | <b>26</b> |
| <b>9. Crystallographic Data .....</b>                                  | <b>27</b> |
| <b>10. References .....</b>                                            | <b>32</b> |
| <b>11. NMR spectra .....</b>                                           | <b>33</b> |

<sup>1</sup>H and <sup>13</sup>C NMR spectra were recorded on a 400 MHz (100 MHz for <sup>13</sup>C NMR, 376 MHz for <sup>19</sup>F NMR) spectrometer. Chemical shift values are reported in ppm (parts per million) with tetramethylsilane (TMS) as an internal standard. The peak patterns are indicated as follows: s, singlet; d, doublet; t, triplet; q, quartet; m, multiplet; dd, doublet of doublets; td, triplet of doublets. The coupling constants (*J*) are reported in Hertz (Hz). Melting points were determined on a XT4A micromelting point apparatus and are uncorrected. High-resolution mass spectra (HRMS) were obtained on a Q-TOF Mass Spectrometer equipped with an electrospray ion source (ESI), and operated in the positive mode. Flash column chromatography was performed over 200-300 mesh silica gel.

Chemical structures of 15 triazole-alkynes (1a-1o) and two additional triazole-alkynes (1p-1s) are shown. The structures are categorized by their substituents and the triazole ring's substitution pattern.

- 1a**: 1-methyl-1H-1,2,3-triazole-4-yl-phenyl-ethynyl-benzene
- 1b**: 1-ethyl-1H-1,2,3-triazole-4-yl-phenyl-ethynyl-benzene
- 1c**: 1-benzyl-1H-1,2,3-triazole-4-yl-phenyl-ethynyl-benzene
- 1d**: 1-methyl-1H-1,2,3-triazole-4-yl-4-methoxyphenyl-ethynyl-benzene
- 1e**: 1-ethyl-1H-1,2,3-triazole-4-yl-4-methoxyphenyl-ethynyl-benzene
- 1f**: 1-ethyl-1H-1,2,3-triazole-4-yl-3-chlorophenyl-ethynyl-benzene
- 1g**: 1-ethyl-1H-1,2,3-triazole-4-yl-3-fluorophenyl-ethynyl-benzene
- 1h**: 1-methyl-1H-1,2,3-triazole-4-yl-3-(trifluoromethyl)phenyl-ethynyl-benzene
- 1i**: 1-ethyl-1H-1,2,3-triazole-4-yl-phenyl-ethynyl-4-chlorophenyl
- 1j**: 1-ethyl-1H-1,2,3-triazole-4-yl-phenyl-ethynyl-2-fluorophenyl
- 1k**: 1-ethyl-1H-1,2,3-triazole-4-yl-phenyl-ethynyl-2-(pyridin-2-yl)phenyl
- 1l**: 1-ethyl-1H-1,2,3-triazole-4-yl-phenyl-ethynyl-2-(furan-2-yl)phenyl
- 1m**: 1-ethyl-1H-1,2,3-triazole-4-yl-phenyl-ethynyl-hexyl
- 1n**: 1-methyl-1H-1,2,3-triazole-4-yl-phenyl-ethynyl-cyclopropyl
- 1o**: 1-methyl-1H-1,2,3-triazole-4-yl-phenyl-ethynyl-vinyl
- 1p**: 1-ethyl-1H-1,2,3-triazole-4-yl-phenyl-ethynyl-cyclohexylmethanol
- 1q**: 1-methyl-1H-1,2,3-triazole-4-yl-phenyl-ethynyl-2-(1-methyl-1H-1,2,3-triazol-4-yl)phenyl
- 1r**: 1-ethyl-1H-1,2,3-triazole-4-yl-phenyl-ethynyl-2-(1-ethyl-1H-1,2,3-triazol-4-yl)phenyl
- 1s**: 1-ethyl-1H-1,2,3-triazole-4-yl-4-methoxyphenyl-ethynyl-2-(1-ethyl-1H-1,2,3-triazol-4-yl)-4-methoxyphenyl

S2

**Substrates 1a-n, 1p were prepared by the following procedure**

(i) Aldehydes **S1** (5.0 mmol), nitroalkanes (15.0 mmol), NaN<sub>3</sub> (12.5 mmol), HOAc (10.0 mmol), NH<sub>4</sub>OAc (5.0 mmol) and DMF (30 mL) were charged in a 100 mL round bottom flask. Then, the reaction mixture was stirred at 100 °C for 0.5-2 h.<sup>[1]</sup> After the reaction was completed (detected by TLC), the mixture was cooled to room temperature. The reaction was quenched with H<sub>2</sub>O (30 mL) and extracted with EtOAc (30 mL×3). The combined organic extracts were washed with brine (3 x 30 mL), then dried over anhydrous sodium sulfate and filtered. The filtrate was evaporated *in vacuo*. The corresponding triazoles **S2** were obtained after purification by flash chromatography on silica gel.

(ii) Triazoles **S2** (3.0 mmol), methyl iodide/ethyl iodide/benzyl bromide (4.5 mmol), K<sub>2</sub>CO<sub>3</sub> (9.0 mmol) and THF (30 mL) were charged in a 100 mL round bottom flask. Then, the reaction mixture was stirred at room temperature overnight. After the reaction was completed (detected by TLC), the reaction was quenched with H<sub>2</sub>O (30 mL) and extracted with EtOAc (30 mL×3). The filtrate was evaporated *in vacuo*. The corresponding triazoles **S3** were obtained after purification by flash chromatography on silica gel.

(iii) In a dry 100 mL round bottom flask, a reaction mixture of 4-(2-bromophenyl)-1,2,3-triazole **S3** (3.0 mmol), PdCl<sub>2</sub>(PPh<sub>3</sub>)<sub>2</sub> (0.3 mmol), CuI (0.3 mmol), triphenylphosphine (0.6 mmol) and terminal alkyne **S4** (15.0 mmol) in Et<sub>2</sub>NH/DMF (30 mL, 2:1) was heated at 80 °C for 5-10 h until substrate **S3** consumed as indicated by TLC.<sup>[2]</sup> The cooled mixture was partitioned between H<sub>2</sub>O (30 mL) and EtOAc (30 mL). The separated aqueous phase was extracted with EtOAc (3 x 30 mL). The combined organic extracts were washed with brine (3 x 30 mL), then dried over anhydrous sodium sulfate and filtered. The filtrate was evaporated *in vacuo*. The residue was purified by flash chromatography on silica gel to afford **1a-n, 1p**.

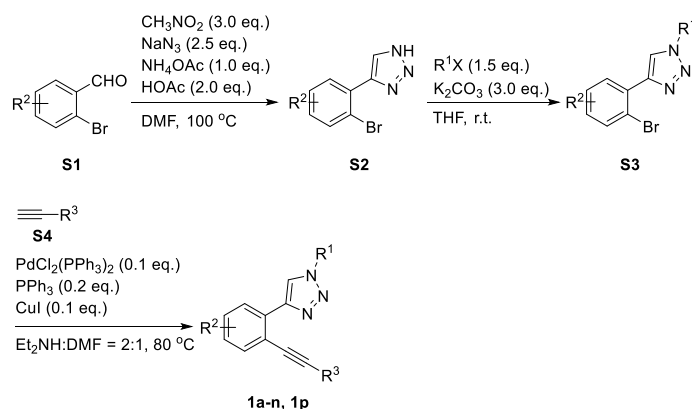

## Terminal alkyne substrates S4

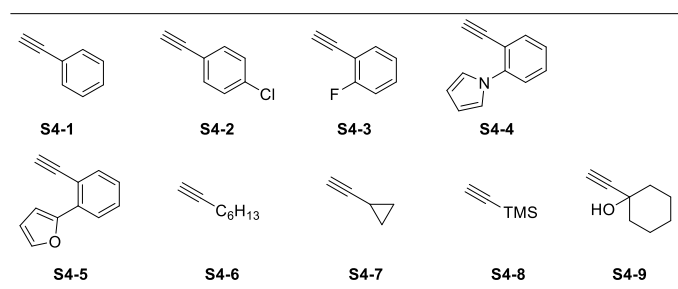

Compounds **S4** (1–3), (6–9) were purchased from commercial sources.

Compounds **S4** (4–5) were synthesized according to literature procedure method as described.<sup>[3]</sup>

### Substrate **1o** was prepared by the following procedure

In a dry 35 mL glass tube, a reaction mixture of 4-(2-bromophenyl)-1,2,3-triazole **S3** (3.0 mmol), Pd(OAc)<sub>2</sub> (0.03 mmol), Cu(Xant-phos)I (0.03 mmol), Cs<sub>2</sub>CO<sub>3</sub> (6.0 mmol) and trimethylsilylacetylene (6.0 mmol) in DMF (5 mL) was heated at 100 °C for 10 h. The cooled mixture was partitioned between H<sub>2</sub>O (30 mL) and EtOAc (30 mL). The separated aqueous phase was extracted with EtOAc (3 x 30 mL). The combined organic extracts were washed with brine (3 x 30 mL), then dried over anhydrous sodium sulfate and filtered. The filtrate was evaporated *in vacuo*. The residue was purified by flash chromatography on silica gel to afford **1o**.

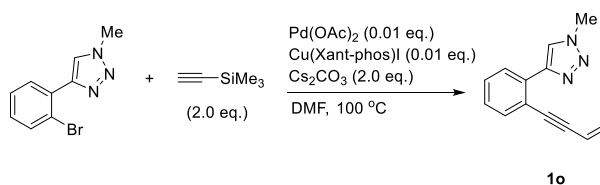

### Substrates **1q-s** were prepared by the following procedure

In a dry 35 mL glass tube, a reaction mixture of 4-(2-bromophenyl)-1,2,3-triazole **S3** (3.0 mmol), Pd(OAc)<sub>2</sub> (0.03 mmol), Cu(Xant-phos)I (0.03 mmol), Cs<sub>2</sub>CO<sub>3</sub> (6.0 mmol) and trimethylsilylacetylene (3.0 mmol) in DMF (5 mL) was heated at 80 °C for 5-10 h until substrate consumed as indicated by TLC.<sup>[4]</sup> The cooled mixture was partitioned between H<sub>2</sub>O (30 mL) and EtOAc (30 mL). The separated aqueous phase was extracted with EtOAc (3 x 30 mL). The combined organic extracts were washed with brine (3 x 30 mL), then dried over anhydrous sodium sulfate and filtered. The filtrate was evaporated *in vacuo*. The residue was purified by flash chromatography on silica gel to afford **1q–1s**.

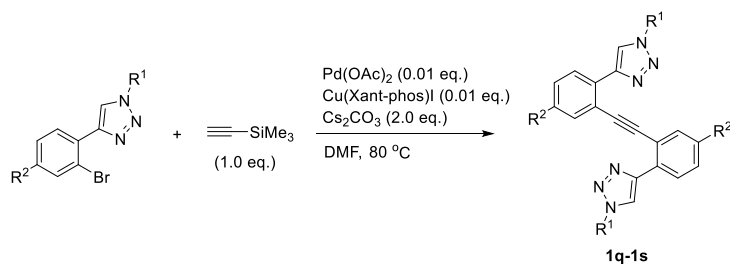

### 1-Methyl-4-(2-(phenylethynyl)phenyl)-1H-1,2,3-triazole **1a**

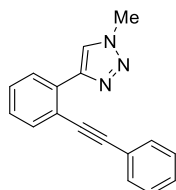

The crude product was purified by column chromatography on silica gel (petroleum ether/ethyl acetate = 6:1); 88% yield; light yellow solid;  $^1\text{H}$  NMR (400 MHz,  $\text{CDCl}_3$ )  $\delta$  = 8.37 (s, 1H), 8.28 (dd,  $J$  = 8.0, 1.0 Hz, 1H), 7.62 (dd,  $J$  = 7.8, 1.2 Hz, 1H), 7.52–7.50 (m, 2H), 7.45 (td,  $J$  = 7.6, 1.4 Hz, 1H), 7.41–7.38 (m, 3H), 7.32 (td,  $J$  = 7.6, 1.4 Hz, 1H), 4.14 (s, 3H) ppm;  $^{13}\text{C}$  NMR (100 MHz,  $\text{CDCl}_3$ )  $\delta$  = 146.1, 133.4, 132.0, 131.5, 129.1, 128.8, 128.7, 127.8, 127.6, 123.6, 123.1, 119.7, 93.6, 89.6, 36.9 ppm.

### 1-Ethyl-4-(2-(phenylethynyl)phenyl)-1H-1,2,3-triazole **1b**

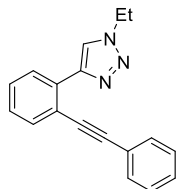

The crude product was purified by column chromatography on silica gel (petroleum ether/ethyl acetate = 8:1); 95% yield; light yellow solid;  $^1\text{H}$  NMR (400 MHz,  $\text{CDCl}_3$ )  $\delta$  = 8.39 (s, 1H), 8.27 (dd,  $J$  = 8.0, 0.9 Hz, 1H), 7.62 (dd,  $J$  = 7.7, 1.1 Hz, 1H), 7.51–7.48 (m, 2H), 7.44 (td,  $J$  = 7.8, 1.4 Hz, 1H), 7.40–7.36 (m, 3H), 7.31 (td,  $J$  = 7.6, 1.2 Hz, 1H), 4.46 (q,  $J$  = 7.4 Hz, 2H), 1.58 (t,  $J$  = 7.4 Hz, 3H) ppm;  $^{13}\text{C}$  NMR (100 MHz,  $\text{CDCl}_3$ )  $\delta$  = 145.8, 133.3, 132.2, 131.4, 129.1, 128.7, 128.7, 127.7, 127.6, 123.1, 121.9, 119.6, 93.6, 89.6, 45.4, 15.6 ppm.

### 1-Benzyl-4-(2-(phenylethynyl)phenyl)-1*H*-1,2,3-triazole 1c

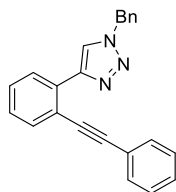

The crude product was purified by column chromatography on silica gel (petroleum ether/ethyl acetate = 6:1); 80% yield; yellow solid;  $^1\text{H}$  NMR (400 MHz,  $\text{CDCl}_3$ )  $\delta$  = 8.32 (s, 1H), 8.29 (dd,  $J$  = 8.0, 0.9 Hz, 1H), 7.60–7.58 (m, 1H), 7.46–7.42 (m, 1H), 7.37–7.33 (m, 5H), 7.31–7.29 (m, 4H), 7.21–7.18 (m, 2H), 7.59 (s, 2H) ppm;  $^{13}\text{C}$  NMR (100 MHz,  $\text{CDCl}_3$ )  $\delta$  = 146.3, 134.7, 133.4, 132.0, 131.4, 129.3, 129.1, 128.9, 128.61, 128.59, 128.4, 127.8, 127.6, 123.0, 122.5, 119.7, 89.5, 54.4 ppm.

### 4-(4-Methoxy-2-(phenylethynyl)phenyl)-1-methyl-1*H*-1,2,3-triazole 1d

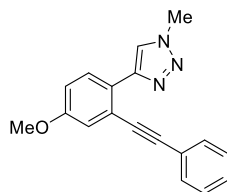

The crude product was purified by column chromatography on silica gel (petroleum ether/ethyl acetate = 4:1); 90% yield; white solid;  $^1\text{H}$  NMR (400 MHz,  $\text{CDCl}_3$ )  $\delta$  = 8.26 (s, 1H), 8.17 (d,  $J$  = 8.7 Hz, 1H), 7.53–7.48 (m, 2H), 7.43–7.37 (m, 3H), 7.13 (d,  $J$  = 2.8 Hz, 1H), 7.02 (dd,  $J$  = 8.8, 2.8 Hz, 1H), 4.13 (s, 3H), 3.86 (s, 3H) ppm;  $^{13}\text{C}$  NMR (100 MHz,  $\text{CDCl}_3$ )  $\delta$  = 159.0, 146.0, 131.5, 129.1, 128.83, 128.75, 125.2, 123.1, 122.8, 120.8, 117.5, 116.0, 93.4, 89.51, 55.6, 36.9 ppm.

### 1-Ethyl-4-(5-methoxy-2-(phenylethynyl)phenyl)-1*H*-1,2,3-triazole 1e

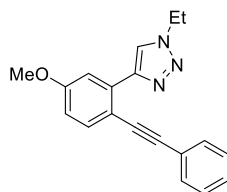

The crude product was purified by column chromatography on silica gel (petroleum ether/ethyl acetate = 10:1); 75% yield; light yellow solid;  $^1\text{H}$  NMR (400 MHz,  $\text{CDCl}_3$ )  $\delta$  = 8.45 (s, 1H), 7.84 (d,  $J$  = 2.7 Hz, 1H), 7.53 (d,  $J$  = 8.6 Hz, 1H), 7.50–7.47 (m, 2H), 7.40–7.35 (m, 3H), 6.87 (dd,  $J$  = 8.6, 2.7 Hz, 1H), 4.47 (q,  $J$  = 7.4 Hz, 2H), 3.91 (s, 3H), 1.59 (t,  $J$  = 7.4 Hz, 3H) ppm;  $^{13}\text{C}$  NMR (100 MHz,  $\text{CDCl}_3$ )  $\delta$  = 160.2, 145.8, 134.8, 133.8, 131.3, 128.7, 128.4, 123.5, 122.1, 115.2, 111.8, 111.3, 92.4, 89.8, 55.7, 45.5, 15.7 ppm.

#### 4-(4-Chloro-2-(phenylethynyl)phenyl)-1-ethyl-1*H*-1,2,3-triazole 1f

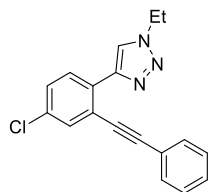

The crude product was purified by column chromatography on silica gel (petroleum ether/ethyl acetate = 10:1); 78% yield; light yellow solid;  $^1\text{H}$  NMR (400 MHz,  $\text{CDCl}_3$ )  $\delta$  = 8.37 (s, 1H), 8.22 (d,  $J$  = 8.6 Hz, 1H), 7.59 (d,  $J$  = 2.2 Hz, 1H), 7.51–7.48 (m, 2H), 7.41–7.38 (m, 4H), 4.46 (q,  $J$  = 7.4 Hz, 2H), 1.58 (t,  $J$  = 7.4 Hz, 3H) ppm;  $^{13}\text{C}$  NMR (100 MHz,  $\text{CDCl}_3$ )  $\delta$  = 145.0, 133.3, 132.8, 131.5, 130.7, 129.3, 129.1, 128.9, 128.8, 122.6, 121.9, 121.1, 94.6, 88.34, 45.5, 15.6 ppm.

#### 1-Ethyl-4-(5-fluoro-2-(phenylethynyl)phenyl)-1*H*-1,2,3-triazole 1g

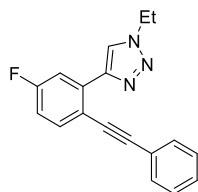

The crude product was purified by column chromatography on silica gel (petroleum ether/ethyl acetate = 10:1); 75% yield; light yellow solid;  $^1\text{H}$  NMR (400 MHz,  $\text{CDCl}_3$ )  $\delta$  = 8.44 (s, 1H), 8.01 (dd,  $J$  = 10.2, 2.7 Hz, 1H), 7.58 (dd,  $J$  = 8.6, 5.7 Hz, 1H), 7.51–7.46 (m, 2H), 7.42–7.37 (m, 3H), 7.00 (td,  $J$  = 8.2, 2.7 Hz, 1H), 4.46 (q,  $J$  = 7.4 Hz, 2H), 1.58 (t,  $J$  = 7.4 Hz, 3H) ppm;  $^{13}\text{C}$  NMR (100 MHz,  $\text{CDCl}_3$ )  $\delta$  = 162.8 (d,  $J_{\text{C-F}}$  = 247.9 Hz), 144.8 (d,  $J_{\text{C-F}}$  = 2.5 Hz), 135.3 (d,  $J_{\text{C-F}}$  = 8.6 Hz), 134.5 (d,  $J_{\text{C-F}}$  = 9.1 Hz), 131.3, 128.8, 128.7, 122.9, 122.1, 115.6 (d,  $J_{\text{C-F}}$  = 3.2 Hz), 115.0 (d,  $J_{\text{C-F}}$  = 22.2 Hz), 114.3 (d,  $J_{\text{C-F}}$  = 24.0 Hz), 93.4, 88.7, 45.5, 15.6 ppm.

#### 1-Methyl-4-(2-(phenylethynyl)-5-(trifluoromethyl)phenyl)-1*H*-1,2,3-triazole 1h

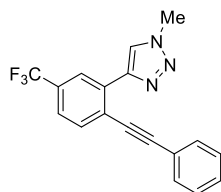

The crude product was purified by column chromatography on silica gel (petroleum ether/ethyl acetate = 8:1); 77% yield; brown solid;  $^1\text{H}$  NMR (400 MHz,  $\text{CDCl}_3$ )  $\delta$  = 8.58 (s, 1H), 8.40 (s, 1H), 7.71–7.69 (m, 1H), 7.54–7.49 (m, 3H), 7.42–7.40 (m, 3H), 4.16 (s, 3H) ppm;  $^{13}\text{C}$  NMR (100 MHz,  $\text{CDCl}_3$ )  $\delta$  = 144.9, 133.9, 132.6, 131.5, 130.7

(q,  $J_{\text{C-F}} = 32.7$  Hz), 129.3, 128.8, 124.6 (q,  $J_{\text{C-F}} = 3.7$  Hz), 124.1 (q,  $J_{\text{C-F}} = 3.6$  Hz), 123.9, 123.8 (q,  $J_{\text{C-F}} = 270.8$  Hz), 123.0, 122.4, 95.9, 88.3, 37.0 ppm.

#### 4-(2-((4-Chlorophenyl)ethynyl)phenyl)-1-ethyl-1*H*-1,2,3-triazole **1i**

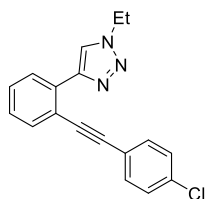

The crude product was purified by column chromatography on silica gel (petroleum ether/ethyl acetate = 10:1); 78% yield; yellow solid;  $^1\text{H}$  NMR (400 MHz,  $\text{CDCl}_3$ )  $\delta$  = 8.31 (s, 1H), 8.24 (dd,  $J = 8.0, 0.9$  Hz, 1H), 7.60 (dd,  $J = 7.8, 1.4$  Hz, 1H), 7.47–7.40 (m, 3H), 7.36–7.29 (m, 3H), 4.46 (q,  $J = 7.4$  Hz, 2H), 1.57 (t,  $J = 7.4$  Hz, 3H) ppm;  $^{13}\text{C}$  NMR (100 MHz,  $\text{CDCl}_3$ )  $\delta$  = 145.8, 134.8, 133.3, 132.6, 132.3, 129.3, 129.0, 127.8, 127.7, 121.8, 121.6, 119.4, 92.3, 90.5, 45.5, 15.7 ppm.

#### 1-Ethyl-4-(2-((2-fluorophenyl)ethynyl)phenyl)-1*H*-1,2,3-triazole **1j**

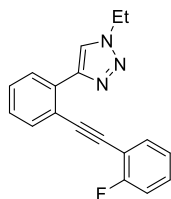

The crude product was purified by column chromatography on silica gel (petroleum ether/ethyl acetate = 6:1); 90% yield; light yellow solid;  $^1\text{H}$  NMR (400 MHz,  $\text{CDCl}_3$ )  $\delta$  = 8.71 (s, 1H), 8.33 (dd,  $J = 8.0, 0.9$  Hz, 1H), 7.64 (dd,  $J = 7.8, 1.4$  Hz, 1H), 7.53 (td,  $J = 7.4, 1.7$  Hz, 1H), 7.46 (td,  $J = 7.6, 1.3$  Hz, 1H), 7.38–7.29 (m, 2H), 7.19–7.12 (m, 2H), 4.48 (q,  $J = 7.4$  Hz, 2H), 1.61 (t,  $J = 7.4$  Hz, 3H) ppm;  $^{13}\text{C}$  NMR (100 MHz,  $\text{CDCl}_3$ )  $\delta$  = 162.8 (d,  $J_{\text{C-F}} = 248.0$  Hz), 145.4, 133.6, 133.5 (d,  $J_{\text{C-F}} = 1.4$  Hz), 132.2, 130.4 (d,  $J_{\text{C-F}} = 8.1$  Hz), 129.4, 127.6 (d,  $J_{\text{C-F}} = 8.9$  Hz), 124.5 (d,  $J_{\text{C-F}} = 3.5$  Hz), 122.4 (d,  $J_{\text{C-F}} = 5.8$  Hz), 119.1, 115.8, 115.6, 111.8 (d,  $J_{\text{C-F}} = 15.3$  Hz), 94.6, 87.5, 45.5, 15.6 ppm.

#### 4-(2-((2-(1*H*-pyrrol-1-yl)phenyl)ethynyl)phenyl)-1-ethyl-1*H*-1,2,3-triazole **1k**

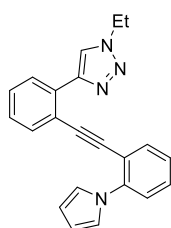

The crude product was purified by column chromatography on silica gel (petroleum ether/ethyl acetate = 6:1); 80% yield; brown liquid;  $^1\text{H}$  NMR (400 MHz,  $\text{CDCl}_3$ )  $\delta$  =



8.22 (dd,  $J = 8.0, 0.9$  Hz, 1H), 7.66 (s, 1H), 7.64–7.58 (m, 2H), 7.46–7.40 (m, 2H), 7.36–7.28 (m, 3H), 7.20 (t,  $J = 2.2$  Hz, 2H), 6.34 (t,  $J = 2.2$  Hz, 2H), 4.30 (q,  $J = 7.4$  Hz, 2H), 1.48 (t,  $J = 7.4$  Hz, 3H) ppm;  $^{13}\text{C}$  NMR (100 MHz,  $\text{CDCl}_3$ )  $\delta = 145.2, 141.6, 133.9, 133.7, 132.0, 129.7, 129.2, 127.6, 127.5, 126.5, 125.1, 122.1, 121.7, 119.2, 117.8, 109.9, 93.7, 90.3, 45.3, 15.8$  ppm.

**1-Ethyl-4-(2-((2-(furan-2-yl)phenyl)ethynyl)phenyl)-1H-1,2,3-triazole 1l**

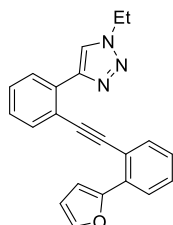

The crude product was purified by column chromatography on silica gel (petroleum ether/ethyl acetate = 6:1); 86% yield; light yellow solid;  $^1\text{H}$  NMR (400 MHz,  $\text{CDCl}_3$ )  $\delta = 8.32$  (s, 1H), 8.27 (dd,  $J = 7.9, 0.9$  Hz, 1H), 7.87 (dd,  $J = 8.0, 0.7$  Hz, 1H), 7.65 (dd,  $J = 7.6, 1.0$  Hz, 1H), 7.55 (dd,  $J = 7.7, 1.0$  Hz, 1H), 7.50–7.46 (m, 2H), 7.42 (td,  $J = 7.8, 1.3$  Hz, 1H), 7.35 (td,  $J = 7.6, 1.3$  Hz, 1H), 7.29–7.24 (m, 2H), 6.43 (dd,  $J = 3.4, 1.8$  Hz, 1H), 4.32 (q,  $J = 7.4$  Hz, 2H), 1.44 (t,  $J = 7.4$  Hz, 3H) ppm;  $^{13}\text{C}$  NMR (100 MHz,  $\text{CDCl}_3$ )  $\delta = 151.9, 145.6, 142.2, 133.6, 133.3, 132.3, 131.9, 129.3, 129.1, 127.81, 127.80, 127.1, 126.0, 122.1, 119.8, 118.2, 111.9, 109.8, 93.7, 93.4, 45.4, 15.4$  ppm.

**1-Ethyl-4-(2-(oct-1-yn-1-yl)phenyl)-1H-1,2,3-triazole 1m**

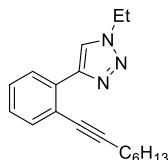

The crude product was purified by column chromatography on silica gel (petroleum ether/ethyl acetate = 10:1); 83% yield; brown liquid;  $^1\text{H}$  NMR (400 MHz,  $\text{CDCl}_3$ )  $\delta = 8.38$  (s, 1H), 8.22 (dd,  $J = 8.0, 1.1$  Hz, 1H), 7.48 (dd,  $J = 7.7, 1.2$  Hz, 1H), 7.37 (td,  $J = 7.6, 1.4$  Hz, 1H), 7.26–7.22 (m, 1H), 4.46 (q,  $J = 7.4$  Hz, 2H), 2.48 (t,  $J = 7.4$  Hz, 3H), 1.67–1.58 (m, 5H), 1.49–1.42 (m, 2H), 1.34–1.27 (m, 4H), 0.91–0.87 (m, 3H) ppm;  $^{13}\text{C}$  NMR (100 MHz,  $\text{CDCl}_3$ )  $\delta = 146.0, 133.6, 131.8, 128.3, 127.6, 127.4, 121.7, 120.5, 95.0, 80.9, 45.4, 31.5, 28.9, 28.8, 22.7, 19.9, 15.7, 14.2$  ppm.

#### 4-(2-(Cyclopropylethynyl)phenyl)-1-methyl-1*H*-1,2,3-triazole 1n

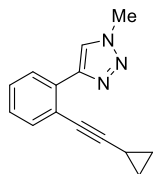

The crude product was purified by column chromatography on silica gel (petroleum ether/ethyl acetate = 6:1); 77% yield; light yellow solid;  $^1\text{H}$  NMR (400 MHz,  $\text{CDCl}_3$ )  $\delta$  = 8.32 (s, 1H), 8.20 (dd,  $J$  = 8.0, 0.9 Hz, 1H), 7.45 (dd,  $J$  = 7.7, 1.1 Hz, 1H), 7.36 (td,  $J$  = 7.5, 1.4 Hz, 1H), 7.23 (td,  $J$  = 7.6, 1.4 Hz, 1H), 4.16 (s, 3H), 1.55–1.48(m, 1H), 0.95–0.90 (m, 2H), 0.83–0.79 (m, 2H) ppm;  $^{13}\text{C}$  NMR (100 MHz,  $\text{CDCl}_3$ )  $\delta$  = 146.2, 133.6, 131.9, 128.3, 127.6, 127.4, 123.3, 120.4, 97.9, 76.0, 36.9, 8.5, 0.6 ppm.

#### 4-(2-(But-3-en-1-yn-1-yl)phenyl)-1-methyl-1*H*-1,2,3-triazole 1o

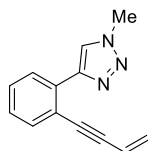

The crude product was purified by column chromatography on silica gel (petroleum ether/ethyl acetate = 15:1); 61% yield; light yellow solid;  $^1\text{H}$  NMR (400 MHz,  $\text{CDCl}_3$ )  $\delta$  = 8.28 (s, 1H), 8.25 (dd,  $J$  = 8.0, 0.9 Hz, 1H), 7.53 (dd,  $J$  = 7.8, 1.0 Hz, 1H), 7.43 (td,  $J$  = 7.6, 1.4 Hz, 1H), 7.29 (td,  $J$  = 7.6, 1.3 Hz, 1H), 6.08 (dd,  $J$  = 17.6, 11.2 Hz, 1H), 5.73 (dd,  $J$  = 17.6, 1.9 Hz, 1H), 5.61 (dd,  $J$  = 11.2, 1.9 Hz, 1H), 4.16 (s, 3H) ppm;  $^{13}\text{C}$  NMR (100 MHz,  $\text{CDCl}_3$ )  $\delta$  = 146.0, 133.4, 132.0, 129.1, 127.7, 127.6, 127.4, 123.5, 119.5, 117.2, 92.5, 90.2, 36.9 ppm.

#### 1-((2-(1-Ethyl-1*H*-1,2,3-triazol-4-yl)phenyl)ethynyl)cyclohexan-1-ol 1p

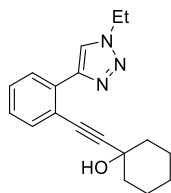

The crude product was purified by column chromatography on silica gel (petroleum ether/ethyl acetate = 4:1); 87% yield; light yellow solid;  $^1\text{H}$  NMR (400 MHz,  $\text{CDCl}_3$ )  $\delta$  = 8.46 (s, 1H), 8.07 (dd,  $J$  = 8.0, 1.0 Hz, 1H), 7.36 (dd,  $J$  = 7.7, 1.2 Hz, 1H), 7.23 (td,  $J$  = 7.7, 1.4 Hz, 1H), 7.11 (td,  $J$  = 7.6, 1.3 Hz, 1H), 4.24 (q,  $J$  = 7.4 Hz, 2H), 1.98–1.94 (m, 2H), 1.66–1.60 (m, 4H), 1.53–1.43 (m, 3H), 1.39 (t,  $J$  = 7.4 Hz, 3H), 1.23–1.14 (m, 1H) ppm;  $^{13}\text{C}$  NMR (100 MHz,  $\text{CDCl}_3$ )  $\delta$  = 145.2, 133.2, 131.6, 128.4, 127.3, 127.1, 122.3, 119.5, 97.9, 83.5, 68.9, 45.2, 39.8, 25.1, 23.2, 15.2 ppm.

### 1,2-Bis(2-(1-methyl-1*H*-1,2,3-triazol-4-yl)phenyl)ethyne 1q

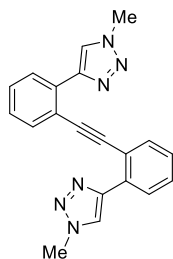

The crude product was purified by column chromatography on silica gel (petroleum ether/ethyl acetate = 4:1); 55% yield; light yellow solid;  $^1\text{H}$  NMR (400 MHz,  $\text{CDCl}_3$ )  $\delta$  = 8.11 (dd,  $J$  = 7.9, 0.8 Hz, 2H), 7.99 (s, 2H), 7.62 (dd,  $J$  = 8.6, 0.9 Hz, 2H), 7.47 (td,  $J$  = 7.6, 1.4 Hz, 2H), 7.36 (td,  $J$  = 7.6, 1.4 Hz, 2H), 3.92 (s, 6H) ppm;  $^{13}\text{C}$  NMR (100 MHz,  $\text{CDCl}_3$ )  $\delta$  = 145.7, 133.1, 132.4, 129.5, 128.3, 128.1, 123.9, 120.0, 92.8, 36.8 ppm.

### 1,2-Bis(2-(1-ethyl-1*H*-1,2,3-triazol-4-yl)phenyl)ethyne 1r

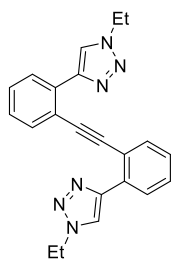

The crude product was purified by column chromatography on silica gel (petroleum ether/ethyl acetate = 4:1); 60% yield; light yellow solid;  $^1\text{H}$  NMR (400 MHz,  $\text{CDCl}_3$ )  $\delta$  = 8.12 (d,  $J$  = 7.9 Hz, 2H), 8.08 (s, 2H), 7.56 (d,  $J$  = 7.24, 2H), 7.44–7.40 (m, 2H), 7.31 (td,  $J$  = 7.6, 0.9 Hz, 2H), 4.22 (q,  $J$  = 7.4 Hz, 4H), 1.34 (t,  $J$  = 7.4 Hz, 6H) ppm;  $^{13}\text{C}$  NMR (100 MHz,  $\text{CDCl}_3$ )  $\delta$  = 145.2, 133.0, 132.3, 129.3, 127.9, 127.8, 122.1, 119.6, 92.9, 45.3, 15.3 ppm.

### 1,2-bis(2-(1-ethyl-1*H*-1,2,3-triazol-4-yl)-5-methoxyphenyl)ethyne 1s

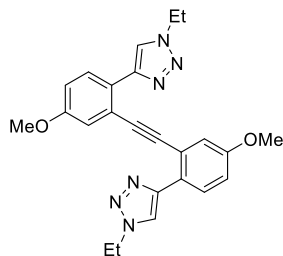

The crude product was purified by column chromatography on silica gel (petroleum ether/ethyl acetate = 2:1); white solid; 45% yield;  $^1\text{H}$  NMR (400 MHz,  $\text{CDCl}_3$ )  $\delta$  = 8.08

(d,  $J = 8.8$  Hz, 2H), 7.95 (s, 2H), 7.13 (d,  $J = 2.8$  Hz, 2H), 7.04 (dd,  $J = 8.8, 2.8$  Hz, 2H), 4.22 (q,  $J = 7.4$  Hz, 4H), 3.87 (s, 6H), 1.36 (t,  $J = 7.4$  Hz, 6H) ppm;  $^{13}\text{C}$  NMR (100 MHz,  $\text{CDCl}_3$ )  $\delta = 159.1, 145.3, 129.6, 125.6, 121.5, 120.6, 117.5, 116.1, 92.7, 55.7, 45.4, 15.4$  ppm.

### 3. Synthesis and analytical data of compounds 2

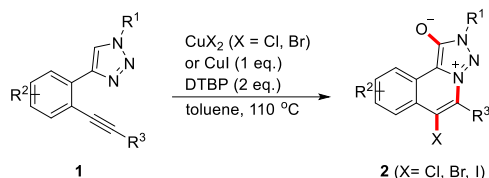

A solution of **1** (0.2 mmol),  $\text{CuX}_2$  (X = Cl, Br) or CuI (0.2 mmol), and DTBP (0.4 mmol) in toluene (3 mL) in a sealed tube was stirred at 110 °C for 8–40 h until substrate **1** consumed as indicated by TLC. The cooled mixture was partitioned between  $\text{H}_2\text{O}$  (30 mL) and EtOAc (30 mL). The separated aqueous phase was extracted with EtOAc (3 x 30 mL). The combined organic extracts were dried over anhydrous sodium sulfate and filtered. The filtrate was evaporated *in vacuo*. The residue was purified by flash chromatography on silica gel to afford **2**.

#### 6-Chloro-2-methyl-5-phenyl-2H-[1,2,3]triazolo[5,1-a]isoquinolin-4-ium-1-olate **2aa**

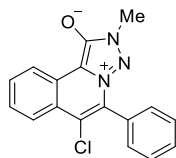

The crude product was purified by column chromatography on silica gel (petroleum ether/ethyl acetate = 1:1); 75% yield; yellow solid; mp: 205–206 °C;  $^1\text{H}$  NMR (400 MHz,  $\text{CDCl}_3$ )  $\delta = 8.88$  (dd,  $J = 8.0, 0.6$  Hz, 1H), 8.14 (dd,  $J = 8.3, 0.7$  Hz, 1H), 7.75 (ddd,  $J = 8.2, 7.2, 1.2$  Hz, 1H), 7.62–7.53 (m, 6H), 3.80 (s, 3H) ppm;  $^{13}\text{C}$  NMR (100 MHz,  $\text{CDCl}_3$ )  $\delta = 153.9, 131.8, 130.7, 130.54, 130.53, 129.2, 129.1, 127.5, 127.3, 125.9, 124.9, 124.8, 121.8, 114.6, 31.4$  ppm; IR (neat):  $\nu_{\text{max}}$  1648, 1606, 1449  $\text{cm}^{-1}$ ; ESI-HRMS:  $m/z$   $[\text{M} + \text{H}]^+$  calcd for  $\text{C}_{17}\text{H}_{13}^{35}\text{ClN}_3\text{O}$ : 310.0742, found: 310.0740.

#### 6-Bromo-2-methyl-5-phenyl-2H-[1,2,3]triazolo[5,1-a]isoquinolin-4-ium-1-olate **2ab**

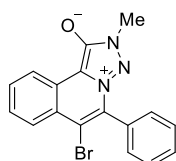

The crude product was purified by column chromatography on silica gel (petroleum ether/ethyl acetate = 1:1); 70% yield; yellow solid; mp: 238–240 °C; <sup>1</sup>H NMR (400 MHz, DMSO-*d*<sub>6</sub>)  $\delta$  = 8.67 (d, *J* = 7.9 Hz, 1H), 8.09 (d, *J* = 8.1 Hz, 1H), 7.80 (t, *J* = 7.2 Hz, 1H), 7.67–7.63 (m, 1H), 7.67–7.51 (m, 5H), 3.65 (s, 3H) ppm; <sup>13</sup>C NMR (100 MHz, DMSO-*d*<sub>6</sub>)  $\delta$  = 152.9, 133.6, 131.2, 130.6, 130.4, 130.1, 129.0, 127.5, 127.2, 125.5, 125.1, 120.2, 118.3, 113.4, 30.8 ppm; IR (neat):  $\nu_{\max}$  1648, 1251 cm<sup>-1</sup>; ESI-HRMS: *m/z* [M + H]<sup>+</sup> calcd for C<sub>17</sub>H<sub>13</sub><sup>79</sup>BrN<sub>3</sub>O: 354.0237, found: 354.0236.

**6-Iodo-2-methyl-5-phenyl-2*H*-[1,2,3]triazolo[5,1-*a*]isoquinolin-4-ium-1-olate 2ac**

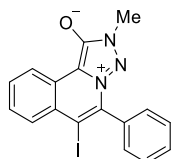

The crude product was purified by column chromatography on silica gel (petroleum ether/ethyl acetate = 1:1); 72% yield; yellow solid; mp: 227–229 °C; <sup>1</sup>H NMR (400 MHz, CDCl<sub>3</sub>)  $\delta$  = 8.84 (dd, *J* = 8.0, 0.8 Hz, 1H), 8.08 (d, *J* = 8.1 Hz, 1H), 7.73–7.69 (m, 1H), 7.64–7.59 (m, 3H), 7.58–7.53 (m, 1H), 7.46–7.41 (m, 2H), 3.78 (s, 3H) ppm; <sup>13</sup>C NMR (100 MHz, CDCl<sub>3</sub>)  $\delta$  = 153.7, 136.7, 135.0, 132.8, 130.6, 130.5, 130.4, 129.3, 128.0, 127.9, 125.5, 121.8, 115.3, 99.7, 31.4 ppm; IR (neat):  $\nu_{\max}$  1643, 1408 cm<sup>-1</sup>; ESI-HRMS: *m/z* [M + H]<sup>+</sup> calcd for C<sub>17</sub>H<sub>13</sub>IN<sub>3</sub>O: 402.0098, found: 402.0096.

**6-Chloro-2-ethyl-5-phenyl-2*H*-[1,2,3]triazolo[5,1-*a*]isoquinolin-4-ium-1-olate 2ba**

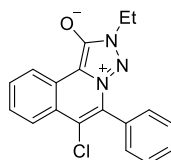

The crude product was purified by column chromatography on silica gel (petroleum ether/ethyl acetate = 1:1); 72% yield; yellow solid; mp: 211–212 °C; <sup>1</sup>H NMR (400 MHz, CDCl<sub>3</sub>)  $\delta$  = 8.88 (d, *J* = 8.6 Hz, 1H), 8.13 (d, *J* = 7.9 Hz, 1H), 7.73 (td, *J* = 7.4, 1.1 Hz, 1H), 7.62–7.57 (m, 4H), 7.56–7.53 (m, 2H), 4.25 (q, *J* = 7.3 Hz, 2H), 1.42 (t, *J* = 7.3 Hz, 3H) ppm; <sup>13</sup>C NMR (100 MHz, CDCl<sub>3</sub>)  $\delta$  = 153.3, 131.8, 130.6, 130.6, 130.4, 129.2, 129.0, 127.4, 127.2, 126.0, 124.8, 124.8, 121.7, 114.6, 39.9, 14.5 ppm; IR (neat):  $\nu_{\max}$  1648, 1448 cm<sup>-1</sup>; ESI-HRMS: *m/z* [M + H]<sup>+</sup> calcd for C<sub>18</sub>H<sub>15</sub><sup>35</sup>ClN<sub>3</sub>O: 324.0898, found: 324.0898.

**2-Benzyl-6-chloro-5-phenyl-2*H*-[1,2,3]triazolo[5,1-*a*]isoquinolin-4-ium-1-olate**  
**2ca**

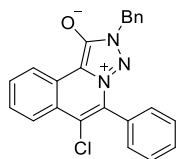

The crude product was purified by column chromatography on silica gel (petroleum ether/ethyl acetate = 1:1); 50% yield; yellow solid; mp: 53–55 °C;  $^1\text{H}$  NMR (400 MHz,  $\text{DMSO-}d_6$ )  $\delta$  = 8.68 (d,  $J$  = 7.4 Hz, 1H), 8.08 (d,  $J$  = 7.9 Hz, 1H), 7.82–7.78 (m, 1H), 7.66–7.62 (m, 3H), 7.61–7.56 (m, 3H), 7.33–7.29 (m, 2H), 7.27–7.25 (m, 3H), 5.33 (s, 2H) ppm;  $^{13}\text{C}$  NMR (100 MHz,  $\text{DMSO-}d_6$ )  $\delta$  = 152.8, 136.0, 132.1, 130.6, 130.5, 130.3, 129.0, 128.9, 128.6, 127.7, 127.5, 127.4, 126.0, 125.5, 124.4, 124.1, 120.2, 113.5, 47.0 ppm; IR (neat):  $\nu_{\text{max}}$  1648, 1606, 1448  $\text{cm}^{-1}$ ; ESI-HRMS:  $m/z$   $[\text{M} + \text{H}]^+$  calcd for  $\text{C}_{23}\text{H}_{17}^{35}\text{ClN}_3\text{O}$ : 386.1055, found: 386.1057.

**6-Chloro-8-methoxy-2-methyl-5-phenyl-2*H*-[1,2,3]triazolo[5,1-*a*]isoquinolin-4-ium-1-olate**  
**2da**

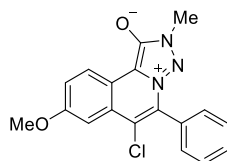

The crude product was purified by column chromatography on silica gel (petroleum ether/ethyl acetate = 2:1); 75% yield; yellow solid; mp: 225–226 °C;  $^1\text{H}$  NMR (400 MHz,  $\text{CDCl}_3$ )  $\delta$  = 8.83 (d,  $J$  = 8.9 Hz, 1H), 7.62–7.59 (m, 3H), 7.56–7.53 (m, 3H), 7.37 (dd,  $J$  = 8.9, 2.5 Hz, 1H), 3.97 (s, 3H), 3.80 (s, 3H) ppm;  $^{13}\text{C}$  NMR (100 MHz,  $\text{CDCl}_3$ )  $\delta$  = 159.3, 153.4, 132.2, 130.5, 129.3, 129.1, 126.7, 126.6, 123.6, 120.1, 120.0, 115.0, 106.9, 55.8, 31.4 ppm; IR (neat):  $\nu_{\text{max}}$  1654, 1462  $\text{cm}^{-1}$ ; ESI-HRMS:  $m/z$   $[\text{M} + \text{H}]^+$  calcd for  $\text{C}_{18}\text{H}_{15}^{35}\text{ClN}_3\text{O}_2$ : 340.0847, found: 340.0848.

**6-Bromo-8-methoxy-2-methyl-5-phenyl-2*H*-[1,2,3]triazolo[5,1-*a*]isoquinolin-4-ium-1-olate**  
**2db**

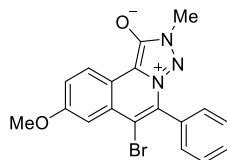

The crude product was purified by column chromatography on silica gel (petroleum ether/ethyl acetate = 1:1); 83% yield; yellow solid; mp: 253–255 °C;  $^1\text{H}$  NMR (400 MHz,  $\text{DMSO-}d_6$ )  $\delta$  = 8.62 (d,  $J$  = 8.7 Hz, 1H), 7.63–7.55 (m, 5H), 7.51–7.46 (m, 2H), 3.93 (s, 3H), 3.64 (s, 3H) ppm;  $^{13}\text{C}$  NMR (100 MHz,  $\text{DMSO-}d_6$ )  $\delta$  = 158.6, 152.4, 134.0,

131.4, 130.3, 130.1, 128.9, 126.9, 122.2, 119.6, 119.5, 117.7, 113.8, 109.4, 55.6, 30.7 ppm; IR (neat):  $\nu_{\max}$  1444, 1260  $\text{cm}^{-1}$ ; ESI-HRMS:  $m/z$   $[\text{M} + \text{H}]^+$  calcd for  $\text{C}_{18}\text{H}_{15}^{79}\text{BrN}_3\text{O}_2$ : 384.0342, found: 384.0341.

**6-Iodo-8-methoxy-2-methyl-5-phenyl-2H-[1,2,3]triazolo[5,1-*a*]isoquinolin-4-ium-1-olate 2dc**

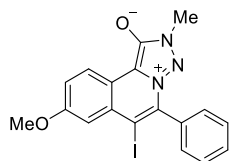

The crude product was purified by column chromatography on silica gel (petroleum ether/ethyl acetate = 2:1); 87% yield; yellow solid; mp: 281–283  $^{\circ}\text{C}$ ;  $^1\text{H}$  NMR (400 MHz,  $\text{CDCl}_3$ )  $\delta$  = 8.81 (d,  $J$  = 8.8 Hz, 1H), 7.63–7.59 (m, 3H), 7.55 (d,  $J$  = 2.5 Hz, 1H), 7.44–7.42 (m, 2H), 7.32 (dd,  $J$  = 8.8, 2.5 Hz, 1H), 3.97 (s, 3H), 3.76 (s, 3H) ppm;  $^{13}\text{C}$  NMR (100 MHz,  $\text{CDCl}_3$ )  $\delta$  = 159.6, 137.1, 135.2, 130.4, 130.3, 129.7, 129.3, 128.7, 123.7, 119.59, 119.57, 115.4, 100.1, 99.0, 55.8, 31.4 ppm; IR (neat):  $\nu_{\max}$  1632, 1614, 1458  $\text{cm}^{-1}$ ; ESI-HRMS:  $m/z$   $[\text{M} + \text{H}]^+$  calcd for  $\text{C}_{18}\text{H}_{15}\text{IN}_3\text{O}_2$ : 432.0203, found: 432.0203.

**6-Chloro-2-ethyl-9-methoxy-5-phenyl-2H-[1,2,3]triazolo[5,1-*a*]isoquinolin-4-ium-1-olate 2ea**

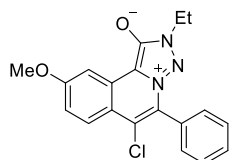

The crude product was purified by column chromatography on silica gel (petroleum ether/ethyl acetate = 1:1); 71% yield; yellow solid; mp: 191–192  $^{\circ}\text{C}$ ;  $^1\text{H}$  NMR (400 MHz,  $\text{CDCl}_3$ )  $\delta$  = 8.34 (s, 1H), 8.02 (d,  $J$  = 9.0 Hz, 1H), 7.60–7.53 (m, 5H), 7.12 (d,  $J$  = 9.0 Hz, 1H), 4.27 (br, 2H), 4.02 (s, 3H), 1.42 (t,  $J$  = 6.6 Hz, 3H) ppm;  $^{13}\text{C}$  NMR (100 MHz,  $\text{CDCl}_3$ )  $\delta$  = 161.3, 130.8, 130.2, 129.5, 129.3, 128.9, 126.9, 126.4, 119.0, 118.1, 102.2, 56.0, 39.7, 14.6 ppm; IR (neat):  $\nu_{\max}$  1483, 1221  $\text{cm}^{-1}$ ; ESI-HRMS:  $m/z$   $[\text{M} + \text{H}]^+$  calcd for  $\text{C}_{19}\text{H}_{17}^{35}\text{ClN}_3\text{O}_2$ : 354.1004, found: 354.1005.

**6,8-Dichloro-2-ethyl-5-phenyl-2H-[1,2,3]triazolo[5,1-*a*]isoquinolin-4-ium-1-olate 2fa**

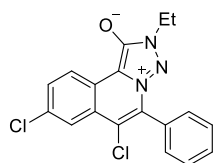

The crude product was purified by column chromatography on silica gel (petroleum ether/ethyl acetate = 1:1); 73% yield; yellow solid; mp: 205–206 °C;  $^1\text{H}$  NMR (400 MHz,  $\text{CDCl}_3$ )  $\delta$  = 8.81 (d,  $J$  = 8.6 Hz, 1H), 8.11 (d,  $J$  = 2.0 Hz, 1H), 7.68 (dd,  $J$  = 8.6, 2.0 Hz, 1H), 7.62–7.58 (m, 3H), 7.57–7.53 (m, 2H), 4.25 (q,  $J$  = 7.3 Hz, 2H), 1.42 (t,  $J$  = 7.3 Hz, 3H) ppm;  $^{13}\text{C}$  NMR (100 MHz,  $\text{CDCl}_3$ )  $\delta$  = 153.3, 133.4, 133.0, 131.1, 130.7, 130.5, 129.1, 128.8, 126.2, 126.0, 124.5, 124.4, 123.2, 114.3, 40.1, 14.4 ppm; IR (neat):  $\nu_{\text{max}}$  1650, 1491, 1415  $\text{cm}^{-1}$ ; ESI-HRMS:  $m/z$   $[\text{M} + \text{H}]^+$  calcd for  $\text{C}_{18}\text{H}_{14}^{35}\text{Cl}_2\text{N}_3\text{O}$ : 358.0508, found: 358.0507.

**8-Chloro-2-ethyl-6-iodo-5-phenyl-2H-[1,2,3]triazolo[5,1-a]isoquinolin-4-ium-1-olate 2fc**

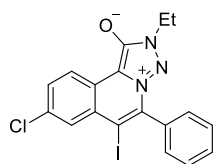

The crude product was purified by column chromatography on silica gel (petroleum ether/ethyl acetate = 1:1); 85% yield; yellow solid; mp: 243–244 °C;  $^1\text{H}$  NMR (400 MHz,  $\text{CDCl}_3$ )  $\delta$  = 8.78 (d,  $J$  = 8.6 Hz, 1H), 8.08 (d,  $J$  = 2.0 Hz, 1H), 7.65–7.59 (m, 4H), 7.44–7.41 (m, 2H), 4.23 (q,  $J$  = 7.2 Hz, 2H), 1.40 (t,  $J$  = 7.2 Hz, 3H) ppm;  $^{13}\text{C}$  NMR (100 MHz,  $\text{CDCl}_3$ )  $\delta$  = 137.9, 134.7, 133.7, 132.4, 130.9, 130.6, 130.3, 129.2, 124.0, 123.2, 97.6, 40.0, 14.4 ppm; IR (neat):  $\nu_{\text{max}}$  1644, 1408  $\text{cm}^{-1}$ ; ESI-HRMS:  $m/z$   $[\text{M} + \text{H}]^+$  calcd for  $\text{C}_{18}\text{H}_{14}^{35}\text{ClIN}_3\text{O}$ : 449.9865, found: 449.9863.

**6-Chloro-2-ethyl-9-fluoro-5-phenyl-2H-[1,2,3]triazolo[5,1-a]isoquinolin-4-ium-1-olate 2ga**

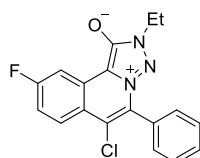

The crude product was purified by column chromatography on silica gel (petroleum ether/ethyl acetate = 4:1); 69% yield; yellow solid; mp: 184–185 °C;  $^{19}\text{F}$  NMR (376 MHz,  $\text{CDCl}_3$ )  $\delta$  = -107.2 ppm;  $^1\text{H}$  NMR (400 MHz,  $\text{CDCl}_3$ )  $\delta$  = 8.52 (dd,  $J$  = 9.2, 2.6 Hz, 1H), 8.11 (dd,  $J$  = 9.0, 5.2 Hz, 1H), 7.61–7.58 (m, 3H), 7.56–7.51 (m, 2H), 7.27 (td,  $J$  = 8.1, 2.6 Hz, 1H), 4.24 (q,  $J$  = 7.3 Hz, 2H), 1.41 (t,  $J$  = 7.3 Hz, 3H) ppm;  $^{13}\text{C}$  NMR (100 MHz,  $\text{CDCl}_3$ )  $\delta$  = 163.8 (d,  $J_{\text{C-F}}$  = 250.8 Hz), 153.4, 131.2 (d,  $J_{\text{C-F}}$  = 2.9 Hz), 130.6, 130.5, 129.0, 128.9, 127.6 (d,  $J_{\text{C-F}}$  = 11.5 Hz), 127.5 (d,  $J_{\text{C-F}}$  = 9.5 Hz), 126.7 (d,  $J_{\text{C-F}}$  = 1.0 Hz), 121.4 (d,  $J_{\text{C-F}}$  = 2.1 Hz), 115.8 (d,  $J_{\text{C-F}}$  = 23.9 Hz), 114.0 (d,  $J_{\text{C-F}}$  = 4.5 Hz), 107.3 (d,  $J_{\text{C-F}}$  = 25.0 Hz), 40.0, 14.4 ppm; IR (neat):  $\nu_{\text{max}}$  1648, 1253, 1030  $\text{cm}^{-1}$ ; ESI-HRMS:  $m/z$   $[\text{M} + \text{H}]^+$  calcd for  $\text{C}_{18}\text{H}_{14}^{35}\text{ClFN}_3\text{O}$ : 342.0804, found: 342.0802.



**6-Chloro-2-methyl-5-phenyl-9-(trifluoromethyl)-2*H*-[1,2,3]triazolo[5,1-*a*]isoquinolin-4-ium-1-olate 2ha**

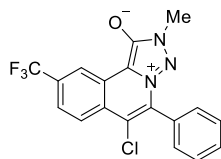

The crude product was purified by column chromatography on silica gel (petroleum ether/ethyl acetate = 1:1); 56% yield; yellow solid; mp: 260–262 °C;  $^{19}\text{F}$  NMR (376 MHz,  $\text{CDCl}_3$ )  $\delta$  = -62.6 ppm;  $^1\text{H}$  NMR (400 MHz,  $\text{CDCl}_3$ )  $\delta$  = 9.12 (br, 1H), 8.24 (d,  $J$  = 8.6 Hz, 1H), 7.77 (dd,  $J$  = 8.6, 1.5 Hz, 1H), 7.64–7.61 (m, 3H), 7.57–7.54 (m, 2H), 3.81 (s, 3H) ppm;  $^{13}\text{C}$  NMR (100 MHz,  $\text{CDCl}_3$ )  $\delta$  = 153.9, 133.7, 132.5 (q,  $J_{\text{C-F}}$  = 33.0 Hz), 130.9, 130.3, 129.2, 128.5, 126.9, 126.6, 125.9, 125.8, 123.7 (q,  $J_{\text{C-F}}$  = 271.3 Hz), 123.4 (q,  $J_{\text{C-F}}$  = 3.5 Hz), 118.9 (q,  $J_{\text{C-F}}$  = 4.1 Hz), 114.0, 31.6 ppm; IR (neat):  $\nu_{\text{max}}$  1645, 1466  $\text{cm}^{-1}$ ; ESI-HRMS:  $m/z$   $[\text{M} + \text{H}]^+$  calcd for  $\text{C}_{18}\text{H}_{12}^{35}\text{ClF}_3\text{N}_3\text{O}$ : 378.0616, found: 378.0615.

**6-Chloro-5-(4-chlorophenyl)-2-ethyl-2*H*-[1,2,3]triazolo[5,1-*a*]isoquinolin-4-ium-1-olate 2ia**

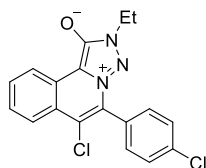

The crude product was purified by column chromatography on silica gel (petroleum ether/ethyl acetate = 2:1); 70% yield; yellow solid; mp: 185–187 °C;  $^1\text{H}$  NMR (400 MHz,  $\text{CDCl}_3$ )  $\delta$  = 8.85 (d,  $J$  = 7.8 Hz, 1H), 8.11 (d,  $J$  = 8.2 Hz, 1H), 7.75–7.71 (m, 1H), 7.59–7.55 (m, 3H), 7.51–7.48 (m, 2H), 4.25 (q,  $J$  = 7.3 Hz, 2H), 1.42 (t,  $J$  = 7.3 Hz, 3H) ppm;  $^{13}\text{C}$  NMR (100 MHz,  $\text{CDCl}_3$ )  $\delta$  = 153.3, 136.6, 132.1, 130.8, 130.7, 129.4, 127.5, 127.5, 127.4, 126.0, 124.8, 124.7, 121.7, 114.7, 39.9, 14.4 ppm; IR (neat):  $\nu_{\text{max}}$  1646, 1482  $\text{cm}^{-1}$ ; ESI-HRMS:  $m/z$   $[\text{M} + \text{H}]^+$  calcd for  $\text{C}_{18}\text{H}_{14}^{35}\text{Cl}_2\text{N}_3\text{O}$ : 358.0508, found: 358.0508.

**6-Bromo-5-(4-chlorophenyl)-2-ethyl-2*H*-[1,2,3]triazolo[5,1-*a*]isoquinolin-4-ium-1-olate 2ib**

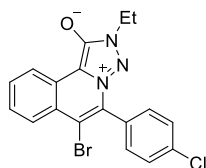

The crude product was purified by column chromatography on silica gel (petroleum ether/ethyl acetate = 1:1); 71% yield; yellow solid; mp: 245–246 °C;  $^1\text{H}$  NMR (400 MHz,  $\text{CDCl}_3$ )  $\delta$  = 8.86 (d,  $J$  = 7.9 Hz, 1H), 8.13 (d,  $J$  = 8.8 Hz, 1H), 7.75–7.71 (m, 1H), 7.58–7.55 (m, 3H), 7.47–7.44 (m, 2H), 4.24 (q,  $J$  = 7.2 Hz, 2H), 1.41 (t,  $J$  = 7.2 Hz, 3H) ppm;  $^{13}\text{C}$  NMR (100 MHz,  $\text{CDCl}_3$ )  $\delta$  = 153.3, 136.5, 132.3, 132.0, 130.8, 129.6, 129.5, 127.64, 127.63, 126.1, 125.7, 121.8, 119.8, 115.0, 39.9, 14.5 ppm; IR (neat):  $\nu_{\text{max}}$  2851, 1648  $\text{cm}^{-1}$ ; ESI-HRMS:  $m/z$   $[\text{M} + \text{H}]^+$  calcd for  $\text{C}_{18}\text{H}_{14}^{79}\text{Br}^{35}\text{ClN}_3\text{O}$ : 402.0003, found: 402.0007.

**5-(4-Chlorophenyl)-2-ethyl-6-iodo-2*H*-[1,2,3]triazolo[5,1-*a*]isoquinolin-4-ium-1-olate 2ic**

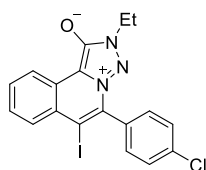

The crude product was purified by column chromatography on silica gel (petroleum ether/ethyl acetate = 1:1); 70% yield; yellow solid; mp: 246–247 °C;  $^1\text{H}$  NMR (400 MHz,  $\text{CDCl}_3$ )  $\delta$  = 8.83–8.81 (m, 1H), 8.05 (d,  $J$  = 8.0 Hz, 1H), 7.71–7.69 (m, 1H), 7.59–7.57 (m, 2H), 7.53 (t,  $J$  = 7.8 Hz, 1H), 7.40–7.37 (m, 2H), 4.25–4.24 (m, 2H), 1.42–1.39 (m, 3H) ppm;  $^{13}\text{C}$  NMR (100 MHz,  $\text{CDCl}_3$ )  $\delta$  = 136.5, 135.7, 133.3, 132.8, 132.0, 130.7, 129.6, 128.0, 127.7, 125.5, 121.8, 99.7, 39.8, 14.5 ppm; IR (neat):  $\nu_{\text{max}}$  1630, 1484  $\text{cm}^{-1}$ ; ESI-HRMS:  $m/z$   $[\text{M} + \text{H}]^+$  calcd for  $\text{C}_{18}\text{H}_{14}^{35}\text{ClIN}_3\text{O}$ : 449.9865, found: 449.9867.

**6-Chloro-2-ethyl-5-(2-fluorophenyl)-2*H*-[1,2,3]triazolo[5,1-*a*]isoquinolin-4-ium-1-olate 2ja**

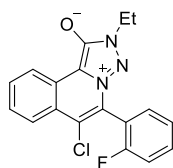

The crude product was purified by column chromatography on silica gel (petroleum ether/ethyl acetate = 4:1); 75% yield; yellow solid; mp: 193–194 °C;  $^{19}\text{F}$  NMR (376 MHz,  $\text{CDCl}_3$ )  $\delta$  = -111.2 ppm;  $^1\text{H}$  NMR (400 MHz,  $\text{CDCl}_3$ )  $\delta$  = 8.88–8.86 (m, 1H), 8.14–8.12 (m, 1H), 7.77–7.73 (m, 1H), 7.64–7.56 (m, 2H), 7.53–7.49 (m, 1H), 7.38 (td,  $J$  = 7.6, 1.1 Hz, 1H), 7.32–7.27 (m, 1H), 4.32–4.18 (m, 2H), 1.42 (t,  $J$  = 7.2 Hz, 3H) ppm;  $^{13}\text{C}$  NMR (100 MHz,  $\text{CDCl}_3$ )  $\delta$  = 161.6 (d,  $J_{\text{C-F}}$  = 249.8 Hz), 153.4, 132.8 (d,  $J_{\text{C-F}}$  = 8.3 Hz), 132.3 (d,  $J_{\text{C-F}}$  = 2.3 Hz), 134.0, 128.8, 127.4, 126.9, 126.3, 124.9, 124.7 (d,  $J_{\text{C-F}}$  = 3.6 Hz), 124.5, 121.8, 117.3 (d,  $J_{\text{C-F}}$  = 15.6 Hz), 116.5 (d,  $J_{\text{C-F}}$  = 21.0 Hz),

114.5, 39.9, 14.4 ppm; IR (neat):  $\nu_{\max}$  1657, 1487  $\text{cm}^{-1}$ ; ESI-HRMS:  $m/z$   $[\text{M} + \text{H}]^+$  calcd for  $\text{C}_{18}\text{H}_{14}^{35}\text{ClFN}_3\text{O}$ : 342.0804, found: 342.0802.

**2-Ethyl-5-(2-fluorophenyl)-6-iodo-2*H*-[1,2,3]triazolo[5,1-*a*]isoquinolin-4-ium-1-olate 2jc**

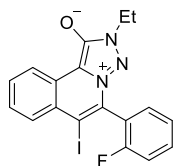

The crude product was purified by column chromatography on silica gel (petroleum ether/ethyl acetate = 1:1); 85% yield; yellow solid; mp: 250–252 °C;  $^{19}\text{F}$  NMR (376 MHz,  $\text{CDCl}_3$ )  $\delta$  = -112.3 ppm;  $^1\text{H}$  NMR (400 MHz,  $\text{CDCl}_3$ )  $\delta$  = 8.82 (d,  $J$  = 7.9 Hz, 1H), 8.04 (dd,  $J$  = 8.2, 1.0 Hz, 1H), 7.72–7.67 (m, 1H), 7.64–7.58 (m, 1H), 7.55–7.51 (m, 1H), 7.44–7.36 (m, 2H), 7.31–7.26 (m, 1H), 4.24 (br, 2H), 1.40 (t,  $J$  = 7.1 Hz, 3H) ppm;  $^{13}\text{C}$  NMR (100 MHz,  $\text{CDCl}_3$ )  $\delta$  = 161.1 (d,  $J_{\text{C-F}}$  = 249.1 Hz), 153.2, 132.8, 132.7, 132.4 (d,  $J_{\text{C-F}}$  = 2.2 Hz), 132.1, 130.9, 127.9, 127.5, 125.8, 124.9 (d,  $J_{\text{C-F}}$  = 3.5 Hz), 123.0 (d,  $J_{\text{C-F}}$  = 15.8 Hz), 121.8, 116.5 (d,  $J_{\text{C-F}}$  = 20.8 Hz), 115.2, 100.8, 39.9, 14.4 ppm; IR (neat):  $\nu_{\max}$  1639, 1607, 1481  $\text{cm}^{-1}$ ; ESI-HRMS:  $m/z$   $[\text{M} + \text{H}]^+$  calcd for  $\text{C}_{18}\text{H}_{14}\text{FIN}_3\text{O}$ : 434.0160, found: 434.0161.

**5-(2-(1*H*-pyrrol-1-yl)phenyl)-2-ethyl-6-iodo-2*H*-[1,2,3]triazolo[5,1-*a*]isoquinolin-4-ium-1-olate 2kc**

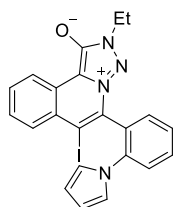

The crude product was purified by column chromatography on silica gel (petroleum ether/ethyl acetate = 1:1); 88 % yield; yellow solid; mp: 150–151 °C;  $^1\text{H}$  NMR (400 MHz,  $\text{CDCl}_3$ )  $\delta$  = 8.76 (dd,  $J$  = 8.0, 1.1 Hz, 1H), 7.99 (d,  $J$  = 8.2 Hz, 1H), 7.71–7.65 (m, 2H), 7.58–7.47 (m, 4H), 6.60 (t,  $J$  = 2.1 Hz, 2H), 5.97 (t,  $J$  = 2.1 Hz, 2H), 4.31–4.22 (m, 1H), 4.12–4.04 (m, 1H), 1.36 (t,  $J$  = 7.2 Hz, 3H) ppm;  $^{13}\text{C}$  NMR (100 MHz,  $\text{CDCl}_3$ )  $\delta$  = 153.1, 140.9, 134.9, 132.7, 131.8, 130.8, 130.2, 127.8, 127.6, 127.4, 126.3, 125.5, 121.7, 121.2, 114.9, 110.0, 100.8, 39.7, 14.4 ppm; IR (neat):  $\nu_{\max}$  1648, 1495  $\text{cm}^{-1}$ ; ESI-HRMS:  $m/z$   $[\text{M} + \text{H}]^+$  calcd for  $\text{C}_{22}\text{H}_{18}\text{IN}_4\text{O}$ : 481.0520, found: 481.0524.

**2-Ethyl-5-(2-(furan-2-yl)phenyl)-6-iodo-2*H*-[1,2,3]triazolo[5,1-*a*]isoquinolin-4-ium-1-olate 2lc**

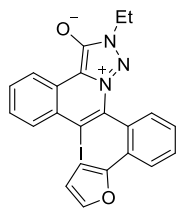

The crude product was purified by column chromatography on silica gel (petroleum ether/ethyl acetate = 2:1); 75 % yield; yellow solid; mp: 230–231 °C;  $^1\text{H}$  NMR (400 MHz,  $\text{CDCl}_3$ )  $\delta$  = 8.84 (d,  $J$  = 8.0 Hz, 1H), 8.05 (dd,  $J$  = 8.3, 1.1 Hz, 1H), 7.94 (dd,  $J$  = 8.0, 1.2 Hz, 1H), 7.72 (t,  $J$  = 7.3 Hz, 1H), 7.64 (td,  $J$  = 7.6, 1.4 Hz, 1H), 7.56–7.49 (m, 2H), 7.39 (dd,  $J$  = 7.7, 1.1 Hz, 1H), 7.17 (d,  $J$  = 1.2 Hz, 1H), 6.17 (dd,  $J$  = 3.4, 1.8 Hz, 1H), 5.92 (d,  $J$  = 3.4 Hz, 1H), 4.24–4.08 (m, 2H), 1.27 (t,  $J$  = 7.2 Hz, 2H) ppm;  $^{13}\text{C}$  NMR (100 MHz,  $\text{CDCl}_3$ )  $\delta$  = 153.2, 151.6, 142.8, 137.0, 132.6, 131.9, 130.9, 130.8, 130.7, 130.6, 128.2, 127.8, 127.7, 127.0, 125.5, 121.8, 111.8, 107.4, 99.6, 39.7, 14.4 ppm; IR (neat):  $\nu_{\text{max}}$  1650, 1288  $\text{cm}^{-1}$ ; ESI-HRMS:  $m/z$   $[\text{M} + \text{H}]^+$  calcd for  $\text{C}_{22}\text{H}_{17}\text{IN}_3\text{O}_2$ : 482.0360, found: 482.0362.

**6-Chloro-2-ethyl-5-hexyl-2*H*-[1,2,3]triazolo[5,1-*a*]isoquinolin-4-ium-1-olate 2ma**

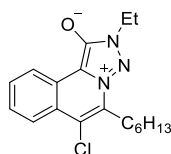

The crude product was purified by column chromatography on silica gel (petroleum ether/ethyl acetate = 3:1); 58% yield; yellow solid; mp: 93–95 °C;  $^1\text{H}$  NMR (400 MHz,  $\text{CDCl}_3$ )  $\delta$  = 8.81 (d,  $J$  = 7.5 Hz, 1H), 8.04 (d,  $J$  = 8.2 Hz, 1H), 7.68–7.64 (m, 1H), 7.55–7.51 (m, 1H), 4.35 (q,  $J$  = 7.3 Hz, 2H), 3.29–3.25 (m, 2H), 1.78–1.70 (m, 2H), 1.53 (t,  $J$  = 7.3 Hz, 3H), 1.49–1.43 (m, 2H), 1.39–1.30 (m, 4H), 0.89 (t,  $J$  = 7.1 Hz, 3H) ppm;  $^{13}\text{C}$  NMR (100 MHz,  $\text{CDCl}_3$ )  $\delta$  = 153.5, 133.7, 129.8, 127.2, 125.8, 125.2, 124.6, 124.2, 121.6, 114.1, 39.8, 31.5, 29.2, 27.5, 25.9, 22.6, 14.5, 14.2 ppm; IR (neat):  $\nu_{\text{max}}$  1642, 1300  $\text{cm}^{-1}$ ; ESI-HRMS:  $m/z$   $[\text{M} + \text{H}]^+$  calcd for  $\text{C}_{18}\text{H}_{23}^{35}\text{ClN}_3\text{O}$ : 332.1524, found: 332.1524.

**6-Chloro-5-cyclopropyl-2-methyl-2*H*-[1,2,3]triazolo[5,1-*a*]isoquinolin-4-ium-1-olate 2na**

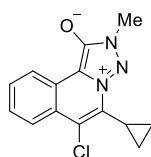

The crude product was purified by column chromatography on silica gel (petroleum ether/ethyl acetate = 2:1); 60% yield; yellow solid; mp: 124–126 °C;  $^1\text{H}$  NMR (400 MHz,  $\text{CDCl}_3$ )  $\delta$  = 8.79 (d,  $J$  = 8.0 Hz, 1H), 8.05 (d,  $J$  = 8.2 Hz, 1H), 7.65 (t,  $J$  = 7.2 Hz, 1H), 7.51 (t,  $J$  = 7.3 Hz, 1H), 3.91 (s, 3H), 2.11–2.04 (m, 1H), 1.34–1.28 (m, 2H), 1.21–1.13 (m, 2H) ppm;  $^{13}\text{C}$  NMR (100 MHz,  $\text{CDCl}_3$ )  $\delta$  = 153.9, 132.3, 130.0, 128.5, 127.2, 125.2, 124.8, 124.2, 121.5, 114.1, 31.4, 9.6, 8.9 ppm; IR (neat):  $\nu_{\text{max}}$  1636, 1253  $\text{cm}^{-1}$ ; ESI-HRMS:  $m/z$   $[\text{M} + \text{H}]^+$  calcd for  $\text{C}_{14}\text{H}_{13}^{35}\text{ClN}_3\text{O}$ : 274.0742, found: 274.0744.

**6-Iodo-2-methyl-5-vinyl-2H-[1,2,3]triazolo[5,1-*a*]isoquinolin-4-ium-1-olate 2oc**

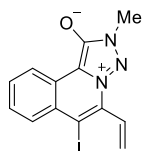

The crude product was purified by column chromatography on silica gel (petroleum ether/ethyl acetate = 1:1); 88 % yield; yellow solid; mp: 115–116 °C;  $^1\text{H}$  NMR (400 MHz,  $\text{CDCl}_3$ )  $\delta$  = 8.81 (d,  $J$  = 7.9 Hz, 1H), 8.07 (d,  $J$  = 8.3 Hz, 1H), 7.66 (t,  $J$  = 7.9 Hz, 1H), 7.52 (t,  $J$  = 8.2 Hz, 1H), 7.06 (dd,  $J$  = 17.7, 12.2 Hz, 1H), 6.51 (dd,  $J$  = 17.7, 0.9 Hz, 1H), 6.01 (dd,  $J$  = 12.2, 0.9 Hz, 1H), 3.91 (s, 3H) ppm;  $^{13}\text{C}$  NMR (100 MHz,  $\text{CDCl}_3$ )  $\delta$  = 153.5, 133.1, 132.3, 131.0, 130.5, 128.0, 127.7, 127.6, 124.8, 121.6, 115.1, 99.6, 31.4 ppm; IR (neat):  $\nu_{\text{max}}$  1637, 1260  $\text{cm}^{-1}$ ; ESI-HRMS:  $m/z$   $[\text{M} + \text{H}]^+$  calcd for  $\text{C}_{13}\text{H}_{11}\text{IN}_3\text{O}$ : 351.9941, found: 351.9942.

**6-Chloro-2-ethyl-2H-[1,2,3]triazolo[5,1-*a*]isoquinolin-4-ium-1-olate 2pa**

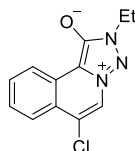

The crude product was purified by column chromatography on silica gel (petroleum ether/ethyl acetate = 1:2); 73% yield; yellow solid; mp: 164–165 °C;  $^1\text{H}$  NMR (400 MHz,  $\text{CDCl}_3$ )  $\delta$  = 8.76 (d,  $J$  = 8.0 Hz, 1H), 8.08 (s, 1H), 8.03 (d,  $J$  = 8.1 Hz, 1H), 7.73–7.69 (m, 1H), 7.58–7.54 (m, 1H), 4.31 (q,  $J$  = 7.3 Hz, 2H), 1.51 (t,  $J$  = 7.3 Hz, 3H) ppm;  $^{13}\text{C}$  NMR (100 MHz,  $\text{CDCl}_3$ )  $\delta$  = 153.1, 132.2, 131.0, 128.7, 127.5, 126.6, 124.3, 122.0, 120.5, 114.2, 39.8, 14.5 ppm; IR (neat):  $\nu_{\text{max}}$  1642  $\text{cm}^{-1}$ ; ESI-HRMS:  $m/z$   $[\text{M} + \text{H}]^+$  calcd for  $\text{C}_{12}\text{H}_{11}^{35}\text{ClN}_3\text{O}$ : 248.0585, found: 248.0587.

## 4. Analytical data of compound 3aa

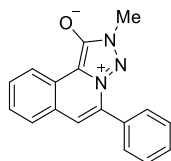

Yellow solid; mp: 186–187 °C;  $^1\text{H}$  NMR (400 MHz,  $\text{CDCl}_3$ )  $\delta$  = 8.85 (d,  $J$  = 8.0 Hz, 1H), 7.83–7.80 (m, 2H), 7.71–7.65 (m, 2H), 7.57–7.53 (m, 3H), 7.52–7.47 (m, 1H), 7.33 (s, 1H), 3.89 (s, 3H) ppm;  $^{13}\text{C}$  NMR (100 MHz,  $\text{CDCl}_3$ )  $\delta$  = 154.1, 134.3, 131.0, 130.4, 129.8, 129.3, 128.9, 127.2, 127.0, 126.4, 126.1, 121.8, 121.3, 115.9, 31.5 ppm; IR (neat):  $\nu_{\text{max}}$  1648, 1495  $\text{cm}^{-1}$ ; ESI-HRMS:  $m/z$   $[\text{M} + \text{H}]^+$  calcd for  $\text{C}_{17}\text{H}_{14}\text{N}_3\text{O}$ : 276.1131, found: 276.1133.

## 5. Synthesis and analytical data of compounds 4

### 2-Methyl-5-phenyl-6-(phenylethynyl)-2H-[1,2,3]triazolo[5,1-a]isoquinolin-4-ium-1-olate 4a

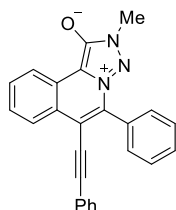

A mixture of 6-iodo-2-methyl-5-phenyl-2H-[1,2,3]triazolo[5,1-a]isoquinolin-4-ium-1-olate **2ac** (80.2 mg, 0.2 mmol), phenylacetylene (102.1 mg, 1.0 mmol),  $\text{Pd}(\text{PPh}_3)_2\text{Cl}_2$  (14.0 mg, 0.02 mmol), CuI (3.8 mg, 0.02 mmol) and  $\text{PPh}_3$  (10.5 mg, 0.04 mmol) in DMF/ $\text{Et}_2\text{NH}$  (5 mL, 1:1) was stirred at 80 °C for 12 h. The cooled mixture was partitioned between  $\text{H}_2\text{O}$  (30 mL) and EtOAc (30 mL). The separated aqueous phase was extracted with EtOAc (3 x 30 mL). The combined organic extracts were washed with brine (3 x 30 mL), then dried over anhydrous sodium sulfate and filtered. The filtrate was evaporated *in vacuo*. The residue was purified by flash chromatography on silica gel (petroleum ether/ethyl acetate = 1:2) to afford **4a** as yellow solid; 71.4 mg, 95 % yield; mp: 227–228 °C;  $^1\text{H}$  NMR (400 MHz,  $\text{CDCl}_3$ )  $\delta$  = 8.87 (d,  $J$  = 8.0 Hz, 1H), 8.27 (d,  $J$  = 8.0 Hz, 1H), 7.78–7.76 (m, 2H), 7.72 (t,  $J$  = 7.1 Hz, 1H), 7.61–7.54 (m, 4H), 7.36–7.31 (m, 5H), 3.86 (s, 3H) ppm;  $^{13}\text{C}$  NMR (100 MHz,  $\text{CDCl}_3$ )  $\delta$  = 136.5, 131.7, 130.9, 130.5, 130.1, 129.3, 128.8, 128.6, 128.5, 127.3, 126.1, 126.0, 125.5, 122.2, 121.8, 115.6, 99.7, 83.5, 31.4 ppm; IR (neat):  $\nu_{\text{max}}$  2920, 2000, 1511  $\text{cm}^{-1}$ ; ESI-HRMS:  $m/z$   $[\text{M} + \text{H}]^+$  calcd for  $\text{C}_{25}\text{H}_{18}\text{N}_3\text{O}$ : 376.1444, found: 376.1446.

## 2-Methyl-5,6-diphenyl-2*H*-[1,2,3]triazolo[5,1-*a*]isoquinolin-4-ium-1-olate **4b**

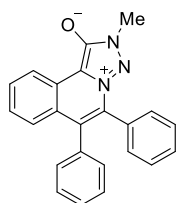

A mixture of 6-iodo-2-methyl-5-phenyl-2*H*-[1,2,3]triazolo[5,1-*a*]isoquinolin-4-ium-1-olate **2ac** (80.2 mg, 0.2 mmol), phenylboronic acid (36.6 mg, 0.3 mmol) Pd(PPh<sub>3</sub>)<sub>4</sub> (2.9 mg, 0.0025 mmol) and K<sub>2</sub>CO<sub>3</sub> (110.6, 0.8 mmol) in EtOH:toluene:H<sub>2</sub>O (7 mL, 1:4:2) was stirred at 100 °C for 10 h. The cooled mixture was partitioned between H<sub>2</sub>O (30 mL) and EtOAc (30 mL). The separated aqueous phase was extracted with EtOAc (3 x 30 mL). The combined organic extracts were dried over anhydrous sodium sulfate and filtered. The filtrate was evaporated *in vacuo*. The residue was purified by flash chromatography on silica gel (petroleum ether/ethyl acetate = 1:1) to afford **4b** as yellow solid; 68.9 mg, 98 % yield; mp: 270–272 °C; <sup>1</sup>H NMR (400 MHz, CDCl<sub>3</sub>) δ = 8.94 (d, *J* = 7.9 Hz, 1H), 7.69–7.65 (m, 1H), 7.40–7.36 (m, 1H), 7.34–7.28 (m, 9H), 7.20–7.17 (m, 2H), 3.84 (s, 3H) ppm; <sup>13</sup>C NMR (100 MHz, CDCl<sub>3</sub>) δ = 154.1, 134.8, 132.9, 132.1, 131.1, 130.9, 130.3, 129.6, 129.3, 128.4, 128.3, 128.0, 127.4, 126.8, 126.6, 126.2, 121.7, 115.2, 31.4 ppm; IR (neat): *v*<sub>max</sub> 1648, 1438 cm<sup>-1</sup>; ESI-HRMS: *m/z* [M + H]<sup>+</sup> calcd for C<sub>23</sub>H<sub>18</sub>N<sub>3</sub>O: 352.1444, found: 352.1443.

## 6. Synthesis and analytical data of compounds **5** and **6**

A mixture of **2jc/2kc** (0.2 mmol), Pd(OAc)<sub>2</sub> (0.02 mmol), and <sup>*t*</sup>BuOLi (0.4 mmol) in DMF (5 mL) was stirred at 120 °C for 2 h until substrate **2jc/2kc** consumed as indicated by TLC. The cooled mixture was partitioned between H<sub>2</sub>O (30 mL) and EtOAc (30 mL). The separated aqueous phase was extracted with EtOAc (3 x 30 mL). The combined organic extracts were washed with brine (3 x 30 mL), then dried over anhydrous sodium sulfate and filtered. The filtrate was evaporated *in vacuo*. The residue was purified by flash chromatography on silica gel to afford **5/6**.

### 2-Ethyl-2*H*-dibenzo[*c,h*]pyrrolo[2,1-*f*][1,2,3]triazolo[1,5-*a*][1,6]naphthyridin-4-ium-1-olate **5**

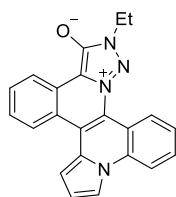

The crude product was purified by column chromatography on silica gel (petroleum ether/ethyl acetate = 1:1); 95 % yield; yellow solid; mp: 233–235 °C; <sup>1</sup>H NMR (400

MHz, CDCl<sub>3</sub>)  $\delta$  = 9.75 (dd,  $J$  = 8.6, 1.0 Hz, 1H), 9.05 (dd,  $J$  = 8.0, 0.9 Hz, 1H), 8.74 (d,  $J$  = 8.4 Hz, 1H), 7.95–7.92 (m, 2H), 7.74–7.70 (m, 1H), 7.68–7.64 (m, 1H), 7.59–7.54 (m, 1H), 7.50–7.44 (m, 2H), 6.89 (dd,  $J$  = 4.1, 2.9 Hz, 1H), 4.48 (q,  $J$  = 7.3 Hz, 2H), 1.65 (t,  $J$  = 7.3 Hz, 3H) ppm; <sup>13</sup>C NMR (100 MHz, CDCl<sub>3</sub>)  $\delta$  = 152.7, 133.1, 130.1, 129.7, 128.0, 127.1, 126.1, 125.9, 125.8, 124.4, 122.9, 121.9, 120.9, 119.5, 116.1, 114.9, 114.8, 114.6, 114.2, 109.6, 39.9, 14.7 ppm; IR (neat):  $\nu_{\max}$  1643, 1408 cm<sup>-1</sup>; ESI-HRMS:  $m/z$  [M + H]<sup>+</sup> calcd for C<sub>22</sub>H<sub>17</sub>N<sub>4</sub>O: 353.1397, found: 353.1398.

**9-Ethyl-9H-benzo[c]furo[3,2-a][1,2,3]triazolo[1,5-f]phenanthridin-11-ium-8-olate**  
**6**

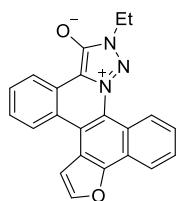

The crude product was purified by column chromatography on silica gel (petroleum ether/ethyl acetate = 2:1); 78 % yield; yellow solid; mp: 227–229 °C; <sup>1</sup>H NMR (400 MHz, CDCl<sub>3</sub>)  $\delta$  = 9.96 (d,  $J$  = 8.5 Hz, 1H), 9.10 (d,  $J$  = 7.9 Hz, 1H), 8.57 (d,  $J$  = 8.4 Hz, 1H), 8.40 (d,  $J$  = 7.4 Hz, 1H), 7.87 (d,  $J$  = 1.8 Hz, 1H), 7.76–7.68 (m, 3H), 7.62 (d,  $J$  = 1.8 Hz, 1H), 7.60–7.56 (m, 1H), 4.50 (q,  $J$  = 7.2 Hz, 2H), 1.68 (t,  $J$  = 7.2 Hz, 3H) ppm; <sup>13</sup>C NMR (100 MHz, CDCl<sub>3</sub>)  $\delta$  = 152.9, 150.9, 145.0, 129.3, 127.9, 127.4, 127.3, 126.8, 125.4, 125.2, 124.7, 123.6, 122.5, 122.0, 121.9, 120.9, 120.5, 117.9, 114.8, 109.6, 40.0, 14.7 ppm; IR (neat):  $\nu_{\max}$  1634, 1457 cm<sup>-1</sup>; ESI-HRMS:  $m/z$  [M + H]<sup>+</sup> calcd for C<sub>22</sub>H<sub>16</sub>N<sub>3</sub>O<sub>2</sub>: 354.1237, found: 354.1236.

## 7. Synthesis and analytical data of compounds 7a–7c

A mixture of **1p–1r** (0.2 mmol), CuI (0.2 mmol) and DTBP (0.4 mmol) in toluene (3 mL) was stirred at 110 °C for 14–18 h until substrate **1p–1r** consumed as indicated by TLC. The cooled mixture was evaporated *in vacuo*, Pd(OAc)<sub>2</sub> (0.02 mmol), <sup>t</sup>BuOLi (0.4 mmol) and DMF (5 mL) were then added. The mixture was heated to 120 °C for 2–3 h until the intermediate consumed as indicated by TLC. The cooled mixture was partitioned between H<sub>2</sub>O (30 mL) and EtOAc (30 mL). The separated aqueous phase was extracted with EtOAc (3 x 30 mL). The combined organic extracts were washed with brine (3 x 30 mL), then dried over anhydrous sodium sulfate and filtered. The filtrate was evaporated *in vacuo*. The residue was purified by flash chromatography on silica gel to afford **7a–7c**.



**3,9-Dimethyl-3,9-dihydrobenzo[*c*]bis([1,2,3]triazolo)[4,5-*a*:1',5'-*f*]phenanthridin-11-ium-8-olate 7a**

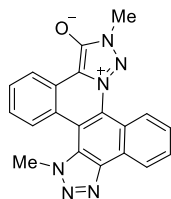

The crude product was purified by column chromatography on silica gel (petroleum ether/ethyl acetate = 1:2); 77 % yield; yellow solid; mp: 266–267 °C; <sup>1</sup>H NMR (400 MHz, CDCl<sub>3</sub>)  $\delta$  = 9.95 (d, *J* = 8.7 Hz, 1H), 9.06 (dd, *J* = 8.0, 0.7 Hz, 1H), 8.99 (dd, *J* = 8.0, 1.1 Hz, 1H), 7.98 (d, *J* = 8.1 Hz, 1H), 7.92–7.88 (m, 1H), 7.84–7.76 (m, 2H), 7.67–7.62 (m, 1H), 4.43 (s, 3H), 4.10 (s, 3H) ppm; <sup>13</sup>C NMR (100 MHz, CDCl<sub>3</sub>)  $\delta$  = 153.3, 143.1, 130.1, 129.7, 128.7, 128.1, 127.33, 127.25, 127.0, 126.4, 125.6, 125.3, 123.0, 122.6, 121.8, 121.3, 115.3, 114.5, 40.3, 31.8 ppm; IR (neat):  $\nu_{\max}$  1654, 1259 cm<sup>-1</sup>; ESI-HRMS: *m/z* [M + H]<sup>+</sup> calcd for C<sub>20</sub>H<sub>15</sub>N<sub>6</sub>O: 355.1302, found: 355.1305.

**3,9-Diethyl-3,9-dihydrobenzo[*c*]bis([1,2,3]triazolo)[4,5-*a*:1',5'-*f*]phenanthridin-11-ium-8-olate 7b**

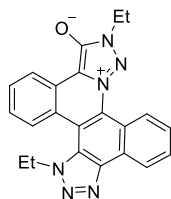

The crude product was purified by column chromatography on silica gel (petroleum ether/ethyl acetate = 1:2); 72 % yield; yellow solid; mp: 238–240 °C; <sup>1</sup>H NMR (400 MHz, CDCl<sub>3</sub>)  $\delta$  = 9.98 (d, *J* = 8.7 Hz, 1H), 9.07 (dd, *J* = 8.0, 0.7 Hz, 1H), 9.02 (dd, *J* = 8.0, 1.2 Hz, 1H), 7.98 (d, *J* = 8.1 Hz, 1H), 7.93–7.90 (m, 1H), 7.86–7.81 (m, 1H), 7.80–7.76 (m, 1H), 7.65–7.61 (m, 1H), 4.91 (q, *J* = 7.2 Hz, 2H), 4.55 (q, *J* = 7.3 Hz, 2H), 1.69 (t, *J* = 7.3 Hz, 3H), 1.38 (t, *J* = 7.2 Hz, 3H) ppm; <sup>13</sup>C NMR (100 MHz, CDCl<sub>3</sub>)  $\delta$  = 152.9, 143.5, 130.2, 129.7, 128.2, 127.8, 127.5, 127.0, 126.6, 126.3, 125.8, 125.4, 123.1, 122.9, 122.0, 121.6, 115.4, 114.7, 47.8, 40.3, 15.3, 14.7 ppm; IR (neat):  $\nu_{\max}$  1654, 1259 cm<sup>-1</sup>; ESI-HRMS: *m/z* [M + H]<sup>+</sup> calcd for C<sub>20</sub>H<sub>15</sub>N<sub>6</sub>O: 383.1615, found: 383.1614.

**3,9-Diethyl-5,13-dimethoxy-3,9-dihydrobenzo[*c*]bis([1,2,3]triazolo)[4,5-*a*:1',5'-*f*]phenanthridin-11-ium-8-olate **7c****

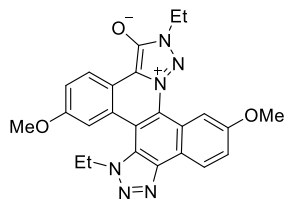

The crude product was purified by column chromatography on silica gel (petroleum ether/ethyl acetate = 1:2); 74 % yield; red solid; mp: 226–227 °C;  $^1\text{H}$  NMR (400 MHz,  $\text{CDCl}_3$ )  $\delta$  = 9.60 (d,  $J$  = 2.4 Hz, 1H), 9.04 (d,  $J$  = 8.9 Hz, 1H), 8.94 (d,  $J$  = 8.9 Hz, 1H), 7.57 (dd,  $J$  = 8.9, 2.4 Hz, 1H), 7.49 (d,  $J$  = 2.4 Hz, 1H), 7.41 (dd,  $J$  = 8.8, 2.4 Hz, 1H), 4.97 (q,  $J$  = 7.3 Hz, 2H), 4.52 (q,  $J$  = 7.3 Hz, 2H), 4.06 (s, 3H), 4.00 (s, 3H), 1.70 (t,  $J$  = 7.3 Hz, 3H), 1.33 (t,  $J$  = 7.3 Hz, 3H) ppm; IR (neat):  $\nu_{\text{max}}$  1631, 1458  $\text{cm}^{-1}$ ; ESI-HRMS:  $m/z$   $[\text{M} + \text{H}]^+$  calcd for  $\text{C}_{24}\text{H}_{23}\text{N}_6\text{O}_3$ : 443.1826, found: 443.1828.

## 8. Control experiment to elucidate the reaction mechanism

To elucidate the reaction mechanism for the formation of 6-halo-[1,2,3]triazolo[5,1-*a*]isoquinoliums **2**, the control experiment was conducted as follows. The reaction of [1,2,3]triazolo[5,1-*a*]isoquinolin-4-ium-1-olate **3aa** under the standard reaction conditions did not afford 6-chloro-[1,2,3]triazolo[5,1-*a*]isoquinolin-4-ium-1-olate **2aa**. This suggested that vinylic C–H bromination of **3aa** did not proceed under the present reaction conditions.

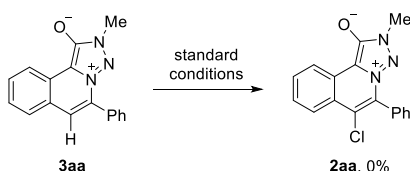

## 9. Crystallographic Data

### 6-Chloro-5-(4-chlorophenyl)-2-ethyl-2*H*-[1,2,3]triazolo[5,1-*a*]isoquinolin-4-ium-1-olate (**2ia**)

The structure of **2ia** was determined by X-ray diffraction. The X-ray data have been deposited at the Cambridge Crystallographic Data Center (CCDC 2202803).

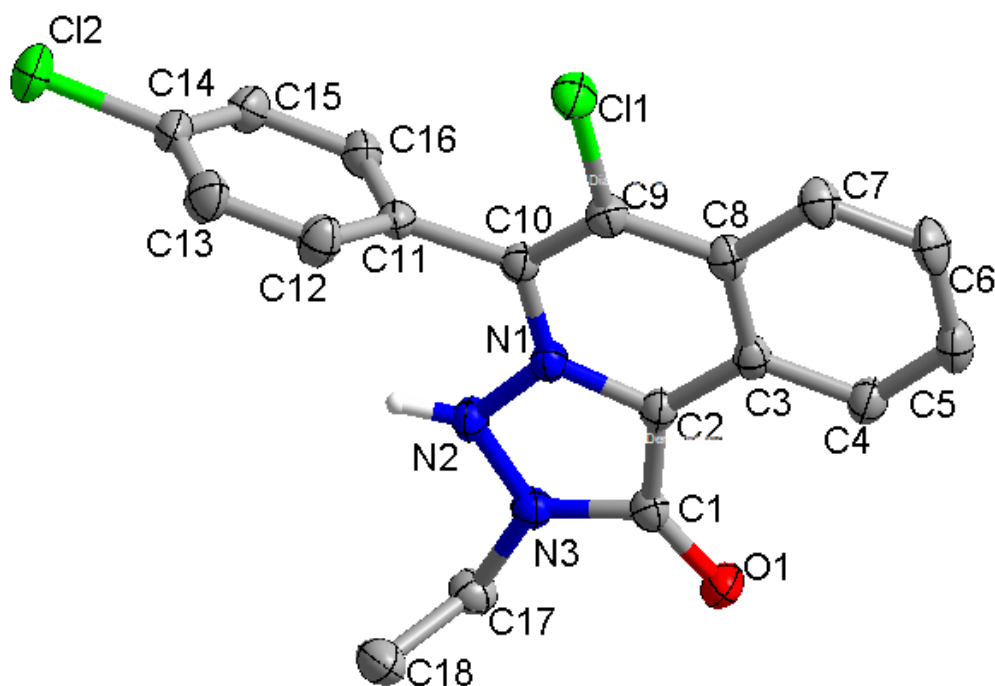

**Table 1. Crystal data and structure refinement for 2ia**

|                                      |                                                                  |
|--------------------------------------|------------------------------------------------------------------|
| Empirical formula                    | C <sub>18</sub> H <sub>14</sub> Cl <sub>2</sub> N <sub>3</sub> O |
| Formula weight                       | 359.22                                                           |
| Temperature/K                        | 293(2)                                                           |
| Crystal system                       | triclinic                                                        |
| Space group                          | P-1                                                              |
| a/Å                                  | 9.4903(6)                                                        |
| b/Å                                  | 9.7844(8)                                                        |
| c/Å                                  | 10.1573(9)                                                       |
| α/°                                  | 117.682(9)                                                       |
| β/°                                  | 100.666(7)                                                       |
| γ/°                                  | 93.883(6)                                                        |
| Volume/Å <sup>3</sup>                | 807.88(13)                                                       |
| Z                                    | 2                                                                |
| ρ <sub>calc</sub> /g/cm <sup>3</sup> | 1.477                                                            |
| μ/mm <sup>-1</sup>                   | 3.696                                                            |
| F(000)                               | 370.0                                                            |

|                                                  |                                                                       |
|--------------------------------------------------|-----------------------------------------------------------------------|
| Crystal size/mm <sup>3</sup>                     | 0.16 × 0.12 × 0.1                                                     |
| Radiation                                        | Cu K $\alpha$ ( $\lambda$ = 1.54184)                                  |
| 2 $\Theta$ range for data collection/ $^{\circ}$ | 9.634 to 134.168                                                      |
| Index ranges                                     | -11 $\leq$ h $\leq$ 11, -11 $\leq$ k $\leq$ 9, -12 $\leq$ l $\leq$ 11 |
| Reflections collected                            | 5805                                                                  |
| Independent reflections                          | 2881 [R <sub>int</sub> = 0.0252, R <sub>sigma</sub> = 0.0406]         |
| Data/restraints/parameters                       | 2881/0/219                                                            |
| Goodness-of-fit on F <sup>2</sup>                | 0.977                                                                 |
| Final R indexes [I $\geq$ 2 $\sigma$ (I)]        | R <sub>1</sub> = 0.0420, wR <sub>2</sub> = 0.1015                     |
| Final R indexes [all data]                       | R <sub>1</sub> = 0.0559, wR <sub>2</sub> = 0.1147                     |
| Largest diff. peak/hole / e $\text{\AA}^{-3}$    | 0.23/-0.33                                                            |

**Table 2. Fractional Atomic Coordinates ( $\times 10^4$ ) and Equivalent Isotropic Displacement Parameters ( $\text{\AA}^2 \times 10^3$ ) for 2ia. U<sub>eq</sub> is defined as 1/3 of the trace of the orthogonalised U<sub>ij</sub> tensor.**

| Atom | x         | y          | z          | U(eq)   |
|------|-----------|------------|------------|---------|
| C1   | 5756(3)   | 8266(3)    | -1550(3)   | 40.3(5) |
| C2   | 6130(2)   | 8612(3)    | 3(3)       | 38.1(5) |
| C3   | 7393(2)   | 9456(3)    | 1236(3)    | 38.9(5) |
| C4   | 8592(3)   | 10246(3)   | 1090(3)    | 47.4(6) |
| C5   | 9771(3)   | 11077(3)   | 2324(3)    | 54.1(7) |
| C6   | 9779(3)   | 11157(3)   | 3720(3)    | 53.1(7) |
| C7   | 8621(3)   | 10375(3)   | 3886(3)    | 47.5(6) |
| C8   | 7412(2)   | 9501(3)    | 2647(3)    | 39.3(5) |
| C9   | 6148(3)   | 8672(3)    | 2751(3)    | 40.0(5) |
| C10  | 4933(2)   | 7920(3)    | 1598(3)    | 37.7(5) |
| C11  | 3578(3)   | 7127(3)    | 1664(3)    | 38.5(5) |
| C12  | 3514(3)   | 5677(3)    | 1586(3)    | 53.4(7) |
| C13  | 2271(3)   | 4969(3)    | 1705(3)    | 58.1(7) |
| C14  | 1108(3)   | 5729(3)    | 1916(3)    | 50.6(7) |
| C15  | 1145(3)   | 7168(3)    | 1988(3)    | 51.4(7) |
| C16  | 2391(3)   | 7868(3)    | 1860(3)    | 45.4(6) |
| C17  | 3425(3)   | 6715(3)    | -3613(3)   | 49.8(7) |
| C18  | 3153(4)   | 4949(3)    | -4428(3)   | 66.8(9) |
| Cl1  | 6188.0(7) | 8659.5(8)  | 4469.1(7)  | 50.0(2) |
| Cl2  | -452.7(9) | 4862.4(10) | 2097.4(10) | 79.1(3) |
| N1   | 4963(2)   | 7918(2)    | 225(2)     | 37.5(5) |
| N2   | 3859(2)   | 7162(2)    | -1017(2)   | 41.9(5) |
| N3   | 4357(2)   | 7396(2)    | -2069(2)   | 41.3(5) |
| O1   | 6422(2)   | 8601(2)    | -2335(2)   | 54.7(5) |

**Table 3. Anisotropic Displacement Parameters ( $\text{\AA}^2 \times 10^3$ ) for 202010226. The Anisotropic displacement factor exponent takes the form:  $-2\pi^2[h^2a^{*2}U_{11}+2hka^*b^*U_{12}+\dots]$**

| Atom | $U_{11}$ | $U_{22}$ | $U_{33}$ | $U_{23}$ | $U_{13}$ | $U_{12}$ |
|------|----------|----------|----------|----------|----------|----------|
| C1   | 41.4(13) | 35.3(12) | 42.7(13) | 18.2(10) | 10.4(11) | 3.7(10)  |
| C2   | 34.8(12) | 35.9(12) | 43.2(13) | 19.0(10) | 10.6(10) | 3.4(9)   |
| C3   | 32.7(12) | 34.1(12) | 47.7(14) | 18.1(10) | 9.8(10)  | 6.0(9)   |
| C4   | 42.1(14) | 48.4(14) | 53.0(15) | 25.8(12) | 13.3(12) | 2.7(11)  |
| C5   | 38.3(14) | 49.6(15) | 71.5(19) | 29.9(14) | 9.5(13)  | -2.0(12) |
| C6   | 35.9(14) | 49.9(15) | 62.9(18) | 26.6(13) | -5.0(12) | -3.6(11) |
| C7   | 39.4(14) | 49.3(15) | 50.7(15) | 25.6(12) | 2.4(12)  | 3.9(11)  |
| C8   | 34.0(12) | 36.7(12) | 46.1(14) | 20.6(10) | 6.0(10)  | 6.6(10)  |
| C9   | 39.9(13) | 40.1(13) | 40.7(13) | 21.1(11) | 7.6(10)  | 7.2(10)  |
| C10  | 37.2(13) | 36.5(12) | 39.6(13) | 18.8(10) | 10.0(10) | 4.7(10)  |
| C11  | 38.6(13) | 39.5(12) | 34.2(12) | 16.6(10) | 7.8(10)  | 0.2(10)  |
| C12  | 50.2(16) | 48.8(15) | 69.4(18) | 33.1(14) | 20.0(14) | 10.7(12) |
| C13  | 65.5(19) | 46.0(15) | 70.6(19) | 32.3(14) | 25.1(16) | 4.4(14)  |
| C14  | 48.5(15) | 53.3(16) | 43.6(14) | 19.5(12) | 14.2(12) | -9.2(12) |
| C15  | 43.2(14) | 54.4(16) | 51.8(16) | 21.7(13) | 13.6(12) | 5.0(12)  |
| C16  | 44.1(14) | 41.9(13) | 49.9(15) | 23.2(12) | 10.4(12) | 2.2(11)  |
| C17  | 51.5(16) | 53.6(16) | 41.7(14) | 23.7(12) | 5.2(12)  | 6.6(12)  |
| C18  | 81(2)    | 54.0(17) | 49.6(17) | 15.1(14) | 15.3(16) | -3.9(15) |
| Cl1  | 46.5(4)  | 59.0(4)  | 45.1(4)  | 29.0(3)  | 4.3(3)   | 2.5(3)   |
| Cl2  | 66.8(5)  | 81.8(6)  | 85.6(6)  | 37.3(5)  | 31.7(4)  | -15.5(4) |
| N1   | 32.6(10) | 37.9(10) | 39.3(11) | 18.0(9)  | 6.2(8)   | 1.6(8)   |
| N2   | 36.7(11) | 45.4(11) | 40.6(11) | 20.9(9)  | 5.1(9)   | 0.8(9)   |
| N3   | 43.1(11) | 42.1(11) | 37.2(11) | 19.8(9)  | 6.4(9)   | 3.2(9)   |
| O1   | 58.0(12) | 58.5(11) | 49.9(11) | 28.4(9)  | 17.6(9)  | -4.1(9)  |

**Table 4. Bond Lengths for 2ia**

| Atom | Atom | Length/ $\text{\AA}$ |
|------|------|----------------------|
| C1   | C2   | 1.417(3)             |
| C1   | N3   | 1.392(3)             |
| C1   | O1   | 1.243(3)             |
| C2   | C3   | 1.427(3)             |
| C2   | N1   | 1.368(3)             |
| C3   | C4   | 1.402(3)             |
| C3   | C8   | 1.410(3)             |
| C4   | C5   | 1.376(3)             |
| C5   | C6   | 1.382(4)             |
| C6   | C7   | 1.376(4)             |
| C7   | C8   | 1.401(3)             |
| C8   | C9   | 1.450(3)             |
| C9   | C10  | 1.351(3)             |

| Atom | Atom | Length/ $\text{\AA}$ |
|------|------|----------------------|
| C10  | C11  | 1.485(3)             |
| C10  | N1   | 1.399(3)             |
| C11  | C12  | 1.380(3)             |
| C11  | C16  | 1.376(3)             |
| C12  | C13  | 1.381(4)             |
| C13  | C14  | 1.366(4)             |
| C14  | C15  | 1.373(4)             |
| C14  | Cl2  | 1.739(3)             |
| C15  | C16  | 1.383(3)             |
| C17  | C18  | 1.506(4)             |
| C17  | N3   | 1.457(3)             |
| N1   | N2   | 1.332(2)             |
| N2   | N3   | 1.347(3)             |

|    |     |          |
|----|-----|----------|
| C9 | Cl1 | 1.745(2) |
|----|-----|----------|

|  |  |  |
|--|--|--|
|  |  |  |
|--|--|--|

**Table 5. Bond Angles for 2ia**

| Atom | Atom | Atom | Angle/°    |
|------|------|------|------------|
| N3   | C1   | C2   | 102.0(2)   |
| O1   | C1   | C2   | 132.6(2)   |
| O1   | C1   | N3   | 125.4(2)   |
| C1   | C2   | C3   | 133.8(2)   |
| N1   | C2   | C1   | 106.35(19) |
| N1   | C2   | C3   | 119.9(2)   |
| C4   | C3   | C2   | 122.2(2)   |
| C4   | C3   | C8   | 119.5(2)   |
| C8   | C3   | C2   | 118.2(2)   |
| C5   | C4   | C3   | 120.1(3)   |
| C4   | C5   | C6   | 120.5(2)   |
| C7   | C6   | C5   | 120.4(2)   |
| C6   | C7   | C8   | 120.5(3)   |
| C3   | C8   | C9   | 117.8(2)   |
| C7   | C8   | C3   | 118.8(2)   |
| C7   | C8   | C9   | 123.3(2)   |
| C8   | C9   | Cl1  | 118.15(17) |
| C10  | C9   | C8   | 123.8(2)   |
| C10  | C9   | Cl1  | 118.00(19) |
| C9   | C10  | C11  | 126.3(2)   |

| Atom | Atom | Atom | Angle/°    |
|------|------|------|------------|
| C9   | C10  | N1   | 116.2(2)   |
| N1   | C10  | C11  | 117.57(19) |
| C12  | C11  | C10  | 120.6(2)   |
| C16  | C11  | C10  | 119.7(2)   |
| C16  | C11  | C12  | 119.6(2)   |
| C11  | C12  | C13  | 120.5(3)   |
| C14  | C13  | C12  | 119.1(3)   |
| C13  | C14  | C15  | 121.3(2)   |
| C13  | C14  | Cl2  | 119.5(2)   |
| C15  | C14  | Cl2  | 119.1(2)   |
| C14  | C15  | C16  | 119.3(3)   |
| C11  | C16  | C15  | 120.2(2)   |
| N3   | C17  | C18  | 112.4(2)   |
| C2   | N1   | C10  | 124.01(19) |
| N2   | N1   | C2   | 113.90(19) |
| N2   | N1   | C10  | 122.02(18) |
| N1   | N2   | N3   | 102.68(17) |
| C1   | N3   | C17  | 126.4(2)   |
| N2   | N3   | C1   | 115.03(19) |
| N2   | N3   | C17  | 118.61(19) |

**Table 6. Torsion Angles for 2ia**

| A  | B  | C  | D   | Angle/°    |
|----|----|----|-----|------------|
| C1 | C2 | C3 | C4  | 3.9(4)     |
| C1 | C2 | C3 | C8  | -176.9(3)  |
| C1 | C2 | N1 | C10 | 176.5(2)   |
| C1 | C2 | N1 | N2  | -0.4(3)    |
| C2 | C1 | N3 | C17 | -179.8(2)  |
| C2 | C1 | N3 | N2  | -0.9(3)    |
| C2 | C3 | C4 | C5  | 178.4(2)   |
| C2 | C3 | C8 | C7  | -177.6(2)  |
| C2 | C3 | C8 | C9  | 0.6(3)     |
| C2 | N1 | N2 | N3  | -0.2(3)    |
| C3 | C2 | N1 | C10 | -2.7(3)    |
| C3 | C2 | N1 | N2  | -179.7(2)  |
| C3 | C4 | C5 | C6  | -0.8(4)    |
| C3 | C8 | C9 | C10 | -3.0(4)    |
| C3 | C8 | C9 | Cl1 | 177.62(18) |
| C4 | C3 | C8 | C7  | 1.6(3)     |
| C4 | C3 | C8 | C9  | 179.8(2)   |

| A   | B   | C   | D   | Angle/°     |
|-----|-----|-----|-----|-------------|
| C10 | C11 | C12 | C13 | 177.5(2)    |
| C10 | C11 | C16 | C15 | -177.2(2)   |
| C10 | N1  | N2  | N3  | -177.2(2)   |
| C11 | C10 | N1  | C2  | 179.5(2)    |
| C11 | C10 | N1  | N2  | -3.8(3)     |
| C11 | C12 | C13 | C14 | -0.6(4)     |
| C12 | C11 | C16 | C15 | 0.4(4)      |
| C12 | C13 | C14 | C15 | 1.0(4)      |
| C12 | C13 | C14 | Cl2 | -179.0(2)   |
| C13 | C14 | C15 | C16 | -0.7(4)     |
| C14 | C15 | C16 | C11 | 0.0(4)      |
| C16 | C11 | C12 | C13 | -0.1(4)     |
| C18 | C17 | N3  | C1  | 113.7(3)    |
| C18 | C17 | N3  | N2  | -65.2(3)    |
| Cl1 | C9  | C10 | C11 | 2.9(3)      |
| Cl1 | C9  | C10 | N1  | -178.13(16) |
| Cl2 | C14 | C15 | C16 | 179.3(2)    |

|    |     |     |     |           |
|----|-----|-----|-----|-----------|
| C4 | C5  | C6  | C7  | 1.5(4)    |
| C5 | C6  | C7  | C8  | -0.6(4)   |
| C6 | C7  | C8  | C3  | -0.9(4)   |
| C6 | C7  | C8  | C9  | -179.0(2) |
| C7 | C8  | C9  | C10 | 175.0(2)  |
| C7 | C8  | C9  | C11 | -4.3(3)   |
| C8 | C3  | C4  | C5  | -0.8(4)   |
| C8 | C9  | C10 | C11 | -176.5(2) |
| C8 | C9  | C10 | N1  | 2.5(4)    |
| C9 | C10 | C11 | C12 | -76.7(3)  |
| C9 | C10 | C11 | C16 | 101.0(3)  |
| C9 | C10 | N1  | C2  | 0.4(3)    |
| C9 | C10 | N1  | N2  | 177.1(2)  |

|    |     |     |     |           |
|----|-----|-----|-----|-----------|
| N1 | C2  | C3  | C4  | -177.1(2) |
| N1 | C2  | C3  | C8  | 2.1(3)    |
| N1 | C10 | C11 | C12 | 104.3(3)  |
| N1 | C10 | C11 | C16 | -78.0(3)  |
| N1 | N2  | N3  | C1  | 0.7(3)    |
| N1 | N2  | N3  | C17 | 179.7(2)  |
| N3 | C1  | C2  | C3  | 179.8(3)  |
| N3 | C1  | C2  | N1  | 0.7(2)    |
| O1 | C1  | C2  | C3  | -0.4(5)   |
| O1 | C1  | C2  | N1  | -179.5(3) |
| O1 | C1  | N3  | C17 | 0.4(4)    |
| O1 | C1  | N3  | N2  | 179.3(2)  |
|    |     |     |     |           |

**Table 7. Hydrogen Atom Coordinates ( $\text{\AA}\times 104$ ) and Isotropic Displacement Parameters ( $\text{\AA}^2\times 103$ ) for 2ia**

| Atom | x        | y        | z        | U(eq) |
|------|----------|----------|----------|-------|
| H4   | 8590.81  | 10209.71 | 158.81   | 57    |
| H5   | 10568.23 | 11589.21 | 2217.56  | 65    |
| H6   | 10571.02 | 11741.72 | 4552.64  | 64    |
| H7   | 8641.74  | 10427.92 | 4827.18  | 57    |
| H12  | 4313.87  | 5173.08  | 1451.33  | 64    |
| H13  | 2225.66  | 3987.84  | 1642.83  | 70    |
| H15  | 341.7    | 7666.11  | 2121.22  | 62    |
| H16  | 2426     | 8842.27  | 1906.95  | 55    |
| H17A | 3878.59  | 7077.75  | -4202.12 | 60    |
| H17B | 2499.91  | 7076.57  | -3557.27 | 60    |
| H18A | 2680.6   | 4583.27  | -3864.43 | 100   |
| H18B | 4064.5   | 4584.64  | -4500.83 | 100   |
| H18C | 2541.33  | 4554.44  | -5439.68 | 100   |

## 10. References

- (1) R. Hui, M. Zhao, M. Chen, Z. Ren and Z. Guan, One-Pot Synthesis of 4-Aryl-NH-1, 2, 3-Triazoles through Three-Component Reaction of Aldehydes, Nitroalkanes and  $\text{NaN}_3$ . *Chin. J. Chem.*, 2017, **35**, 1–5.
- (2) P. Pierrat, S. Hesse, C. Cebrián and P. C. Gros, Controlling charge-transfer properties through a microwave-assisted mono-or bis-annulation of dialkynyl-N-(het) arylpyrroles. *Org. Biomol. Chem.*, 2017, **15**, 8568–8575.
- (3) K. Naveen, S. A. Nikson and P. T. Perumal, Palladium-Catalyzed Synthesis of Tetrasubstituted Olefins by Triple Domino Process. *Adv. Synth. Catal.*, 2017, **359**, 2407–2413.
- (4) S. Qiu, C. Zhang, R. Qiu, G. Yin and J. Huang, One-Pot Domino Synthesis of Diarylalkynes/1,4-Diaryl-1,3-diynes by [9,9-Dimethyl-4,5-bis(diphenylphosphino) xanthene](Xantphos)–Copper(I) Iodide–Palladium(II) Acetate-Catalyzed Double Sonogashira-Type Reaction. *Adv. Synth. Catal.*, 2018, **360**, 313–321.



## 11. NMR spectra

$^1\text{H}$  NMR ( $\text{CDCl}_3$ , 400 MHz) and  $^{13}\text{C}$  NMR ( $\text{CDCl}_3$ , 100 MHz) spectra of **2aa**

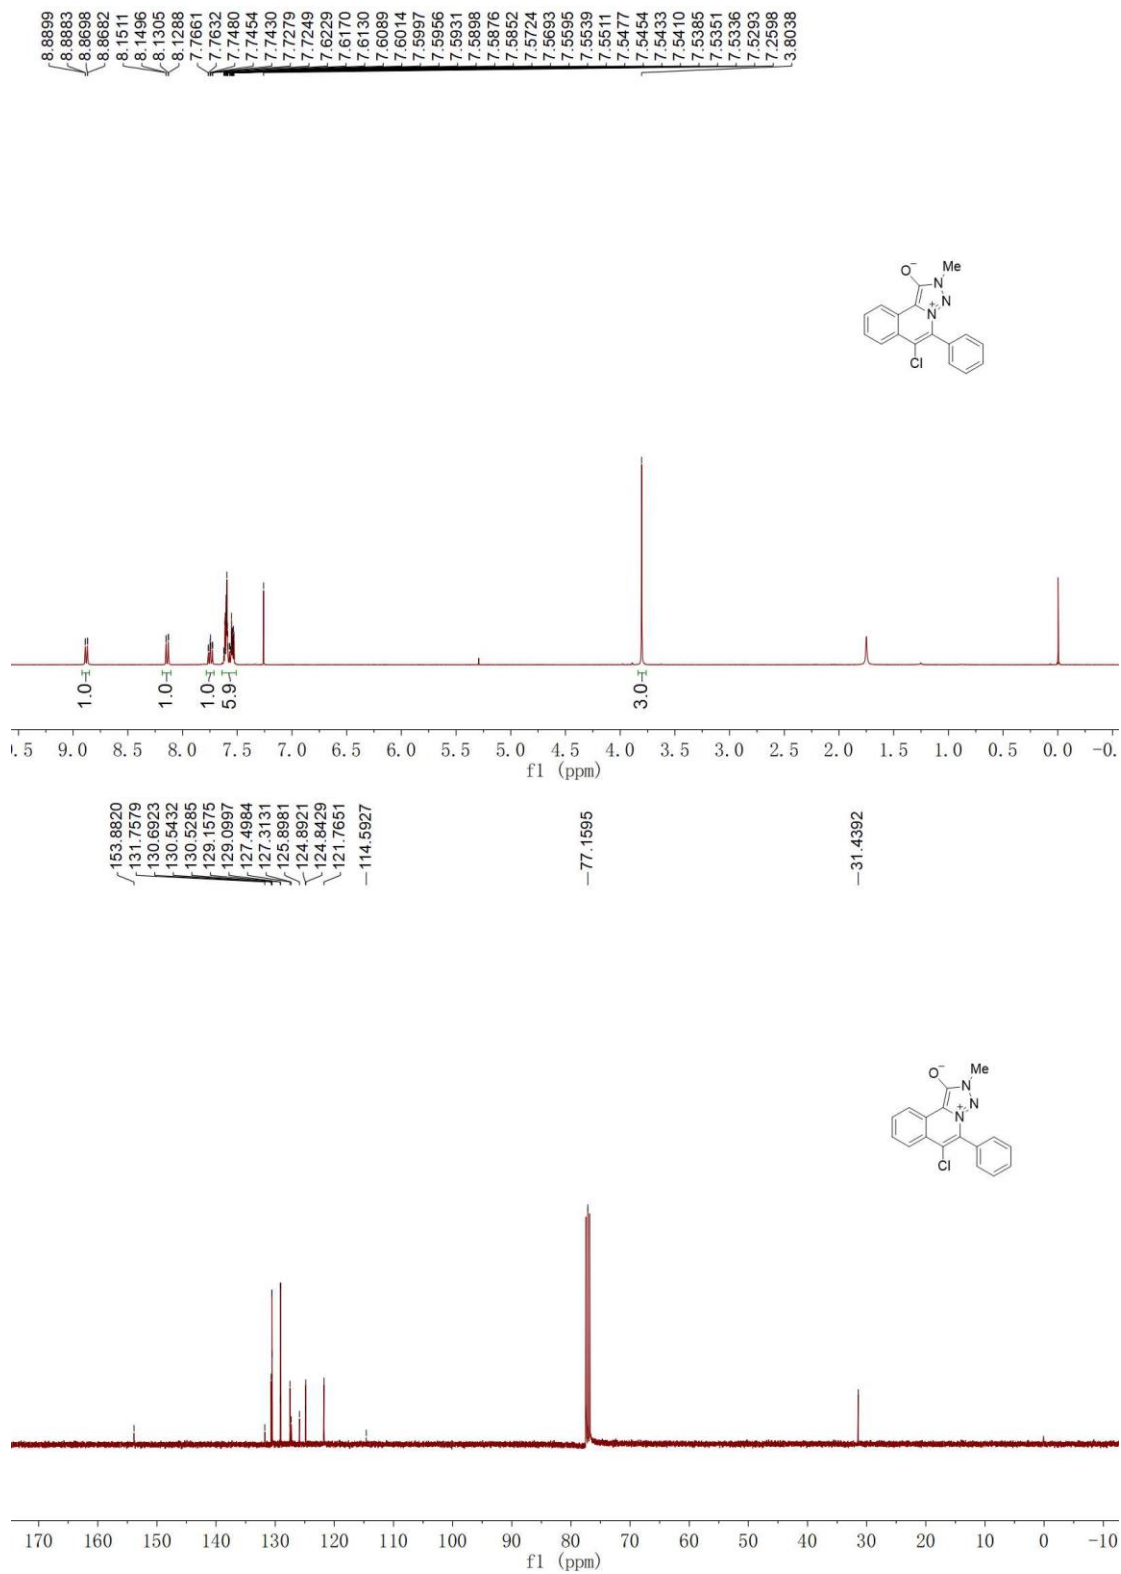

$^1\text{H}$  NMR ( $\text{DMSO-}d_6$ , 400 MHz) and  $^{13}\text{C}$  NMR ( $\text{DMSO-}d_6$ , 100 MHz) spectra of **2ab**

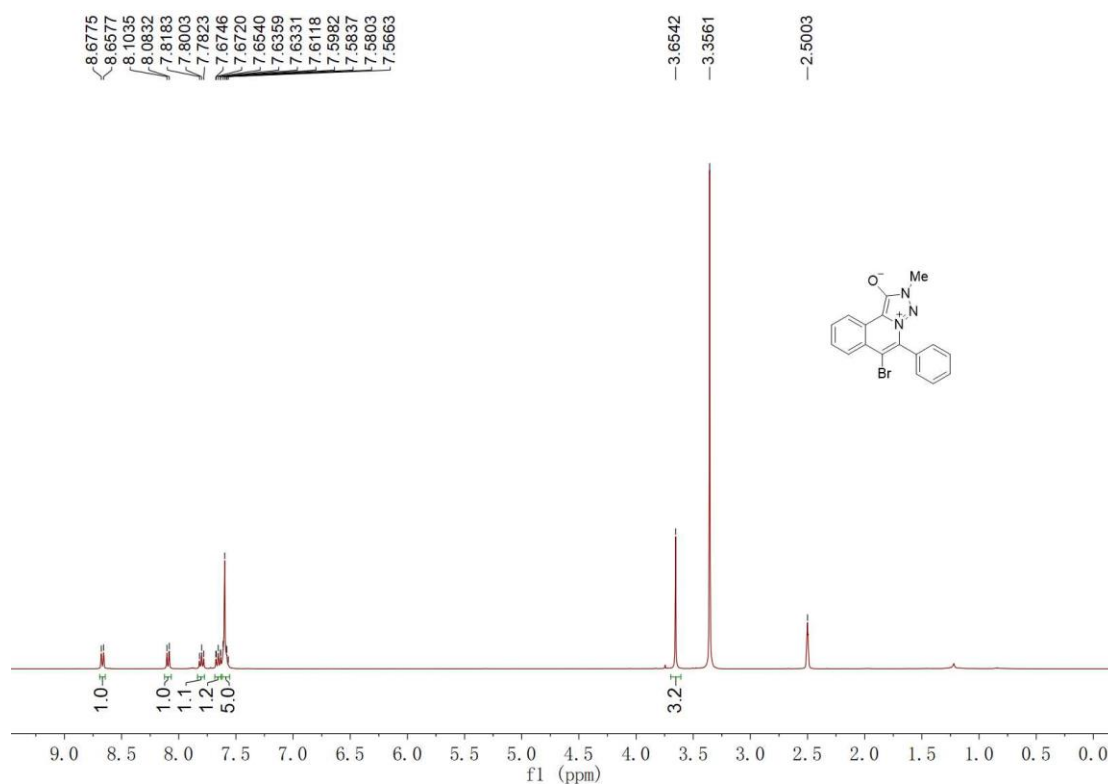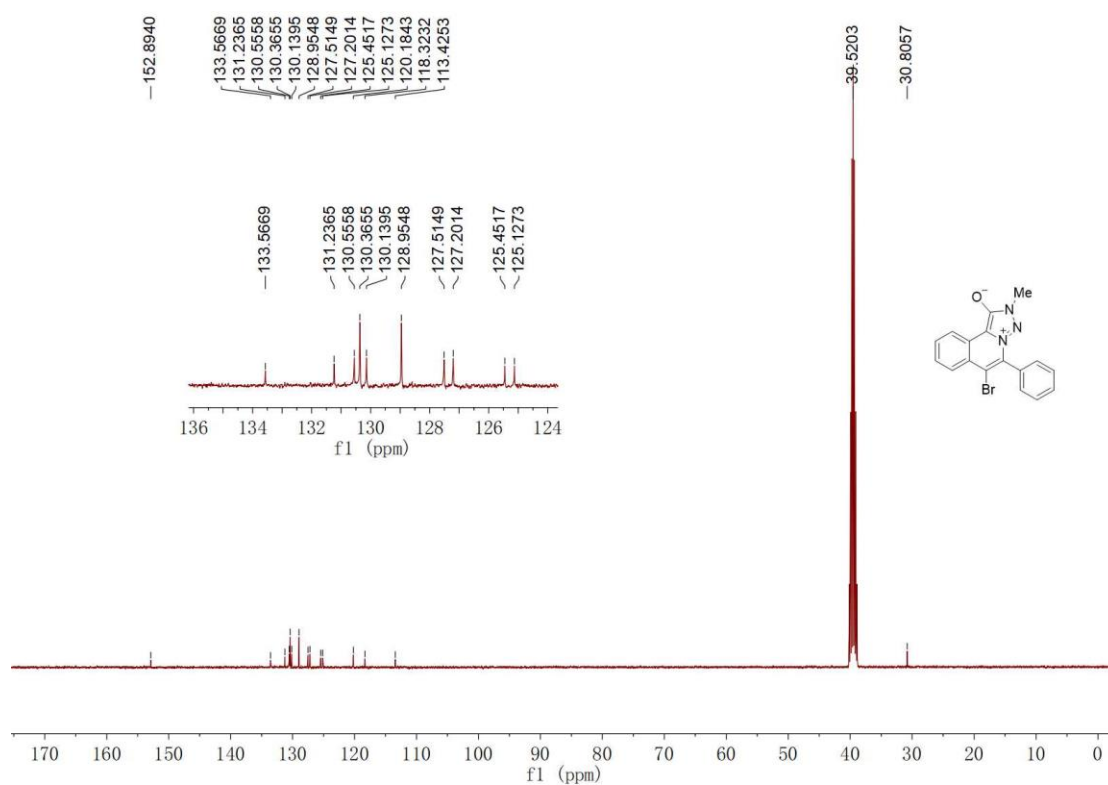

$^1\text{H}$  NMR ( $\text{CDCl}_3$ , 400 MHz) and  $^{13}\text{C}$  NMR ( $\text{CDCl}_3$ , 100 MHz) spectra of **2ac**

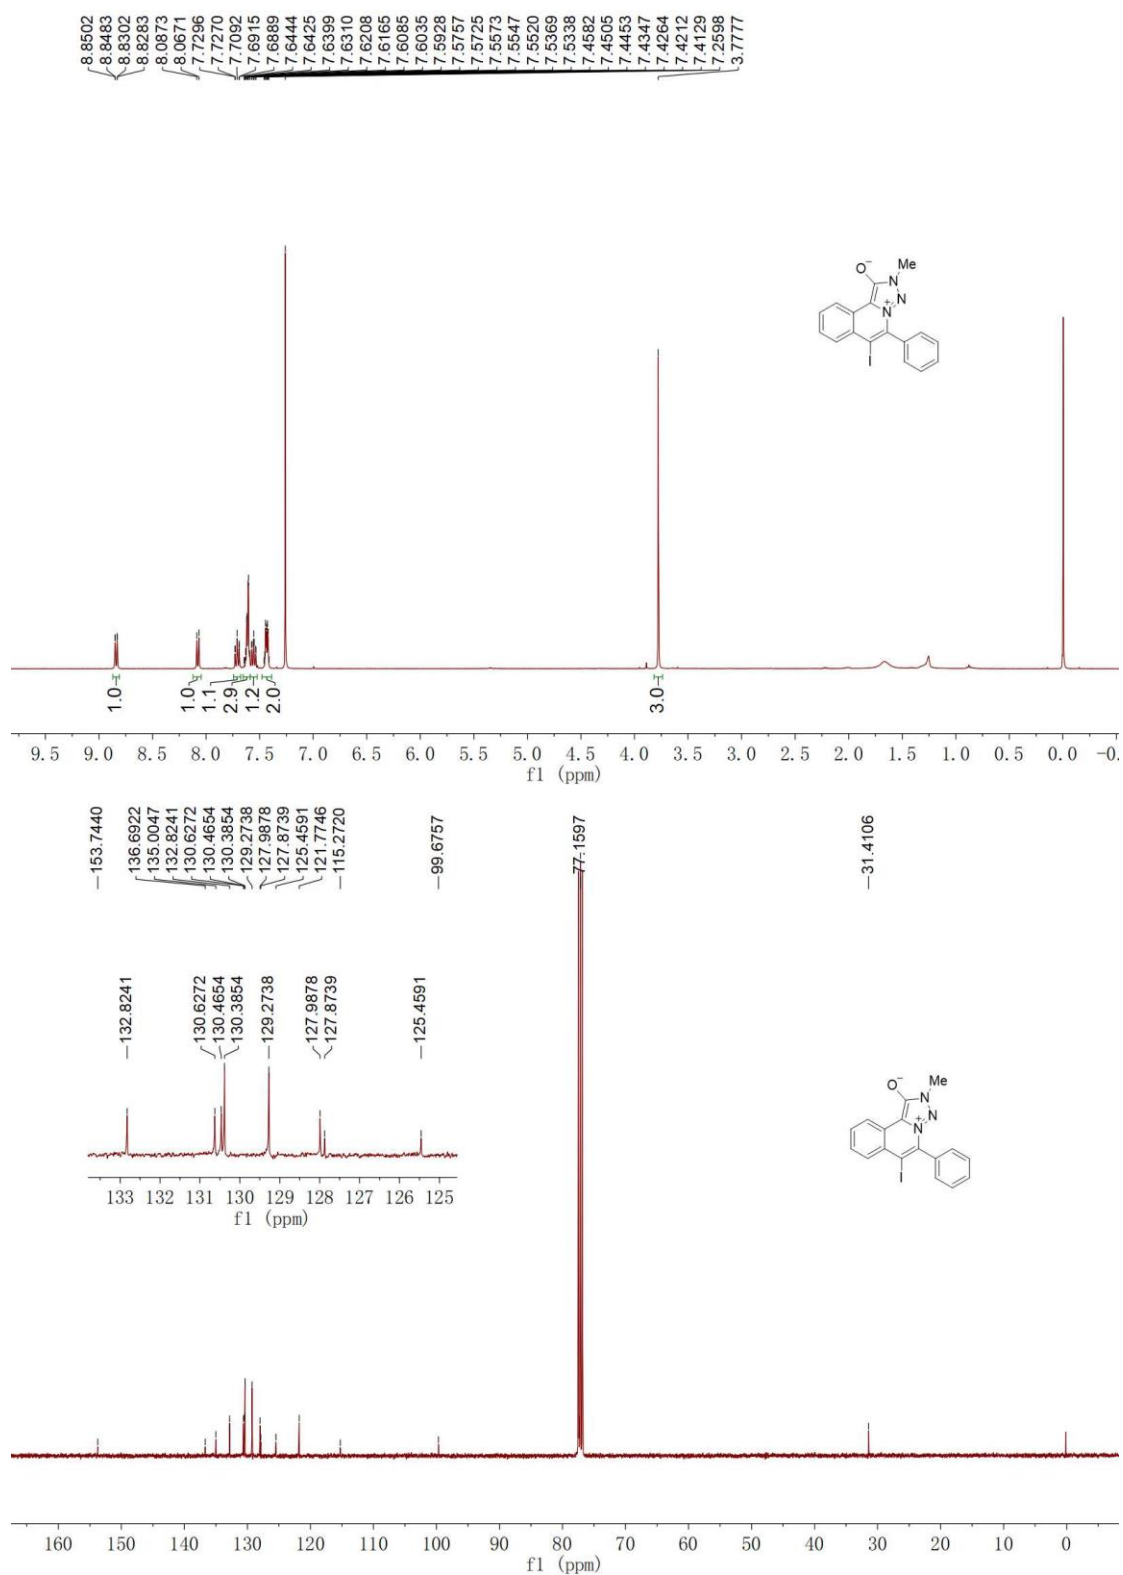

$^1\text{H}$  NMR ( $\text{CDCl}_3$ , 400 MHz) and  $^{13}\text{C}$  NMR ( $\text{CDCl}_3$ , 100 MHz) spectra of **2ba**

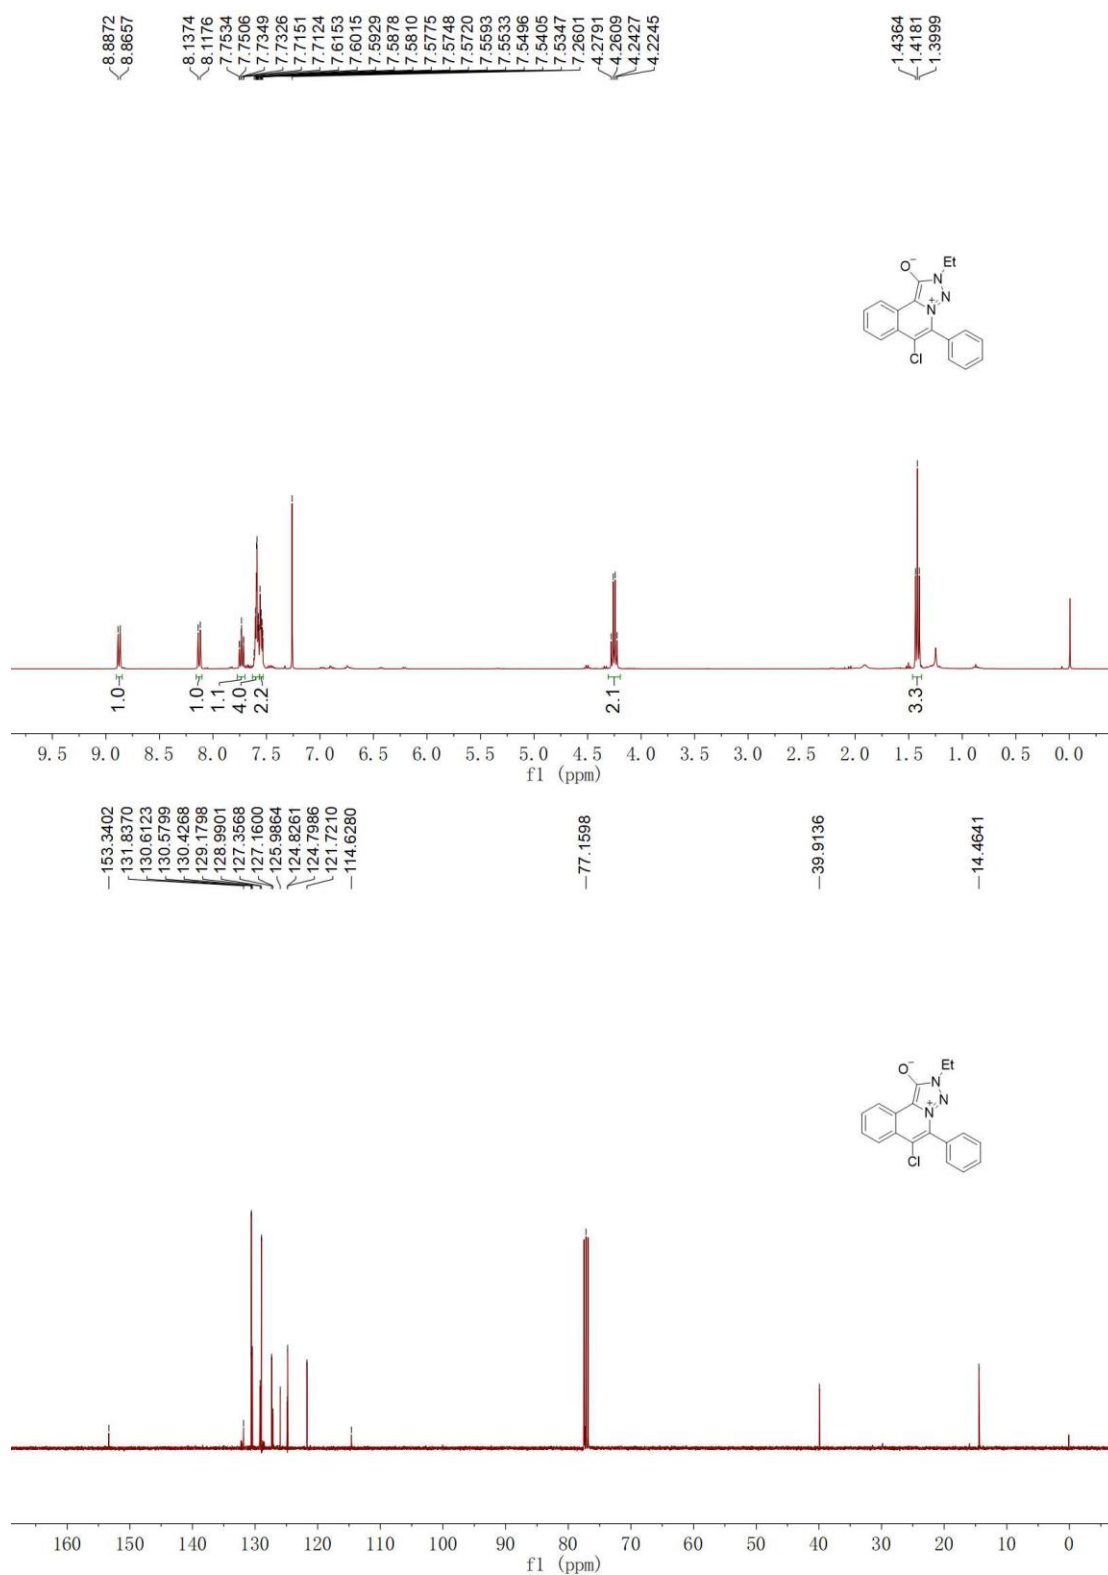

$^1\text{H}$  NMR (DMSO- $d_6$ , 400 MHz) and  $^{13}\text{C}$  NMR (DMSO- $d_6$ , 100 MHz) spectra of **2ca**

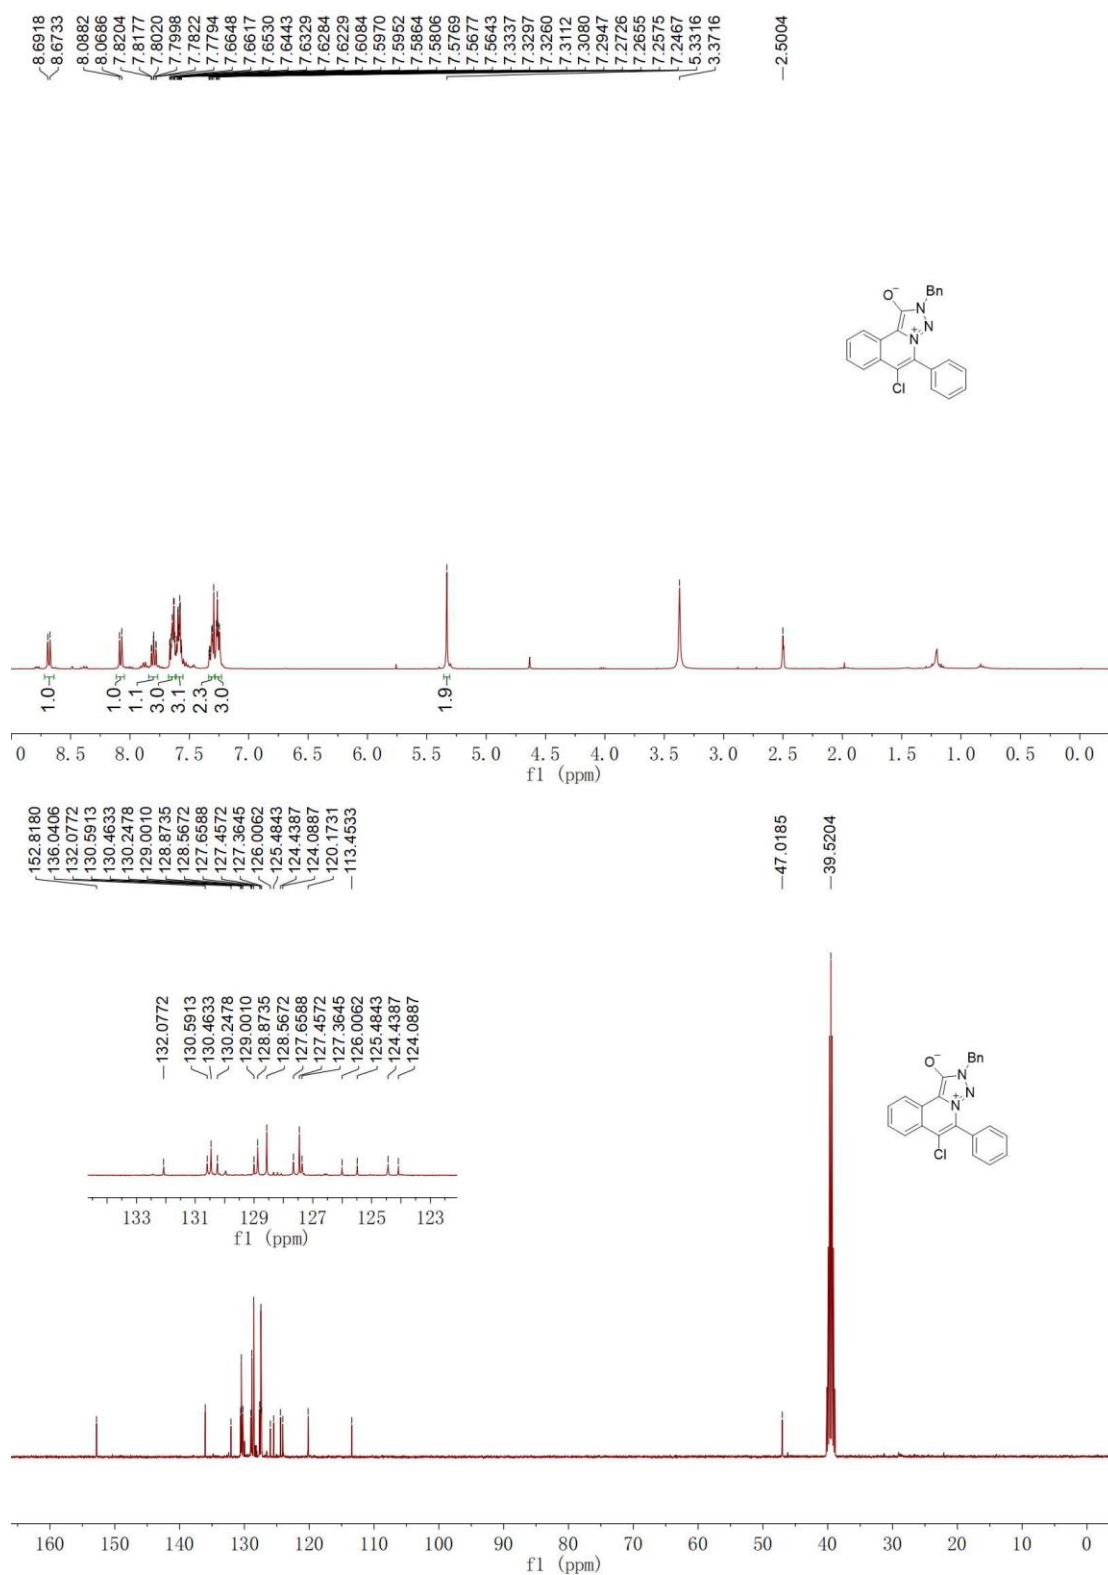

$^1\text{H}$  NMR ( $\text{CDCl}_3$ , 400 MHz) and  $^{13}\text{C}$  NMR ( $\text{CDCl}_3$ , 100 MHz) spectra of **2da**

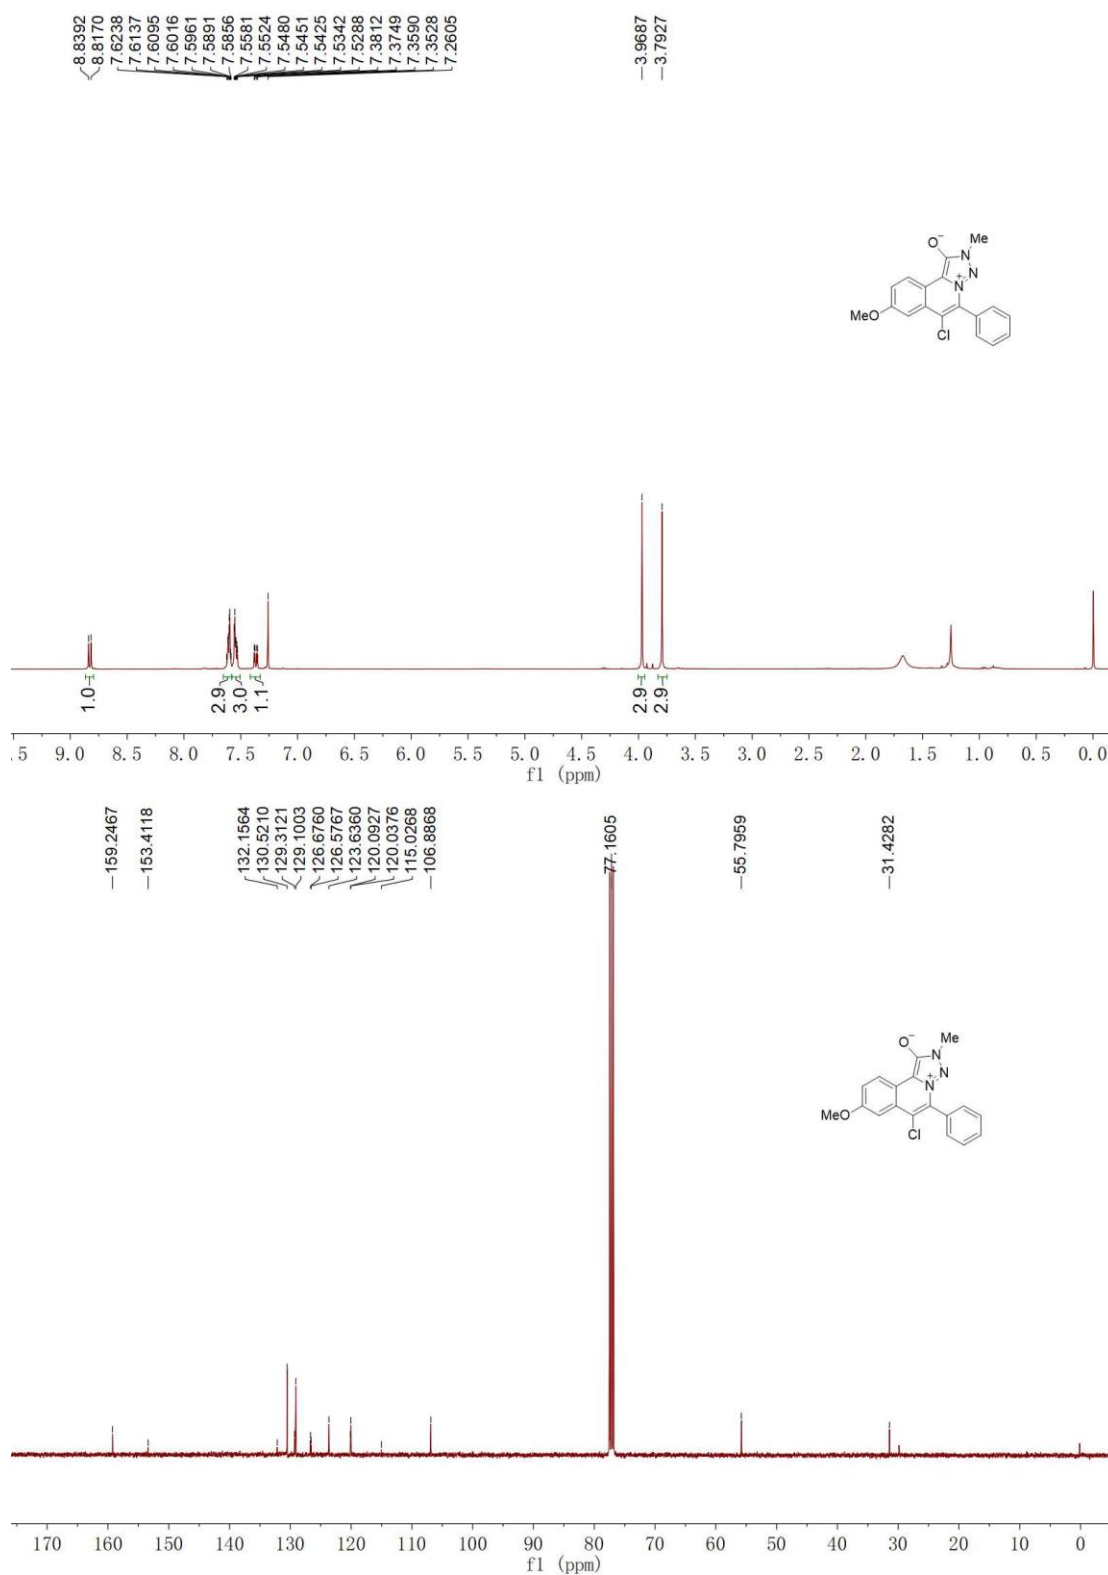

$^1\text{H}$  NMR (DMSO- $d_6$ , 400 MHz) and  $^{13}\text{C}$  NMR (DMSO- $d_6$ , 100 MHz) spectra of **2db**

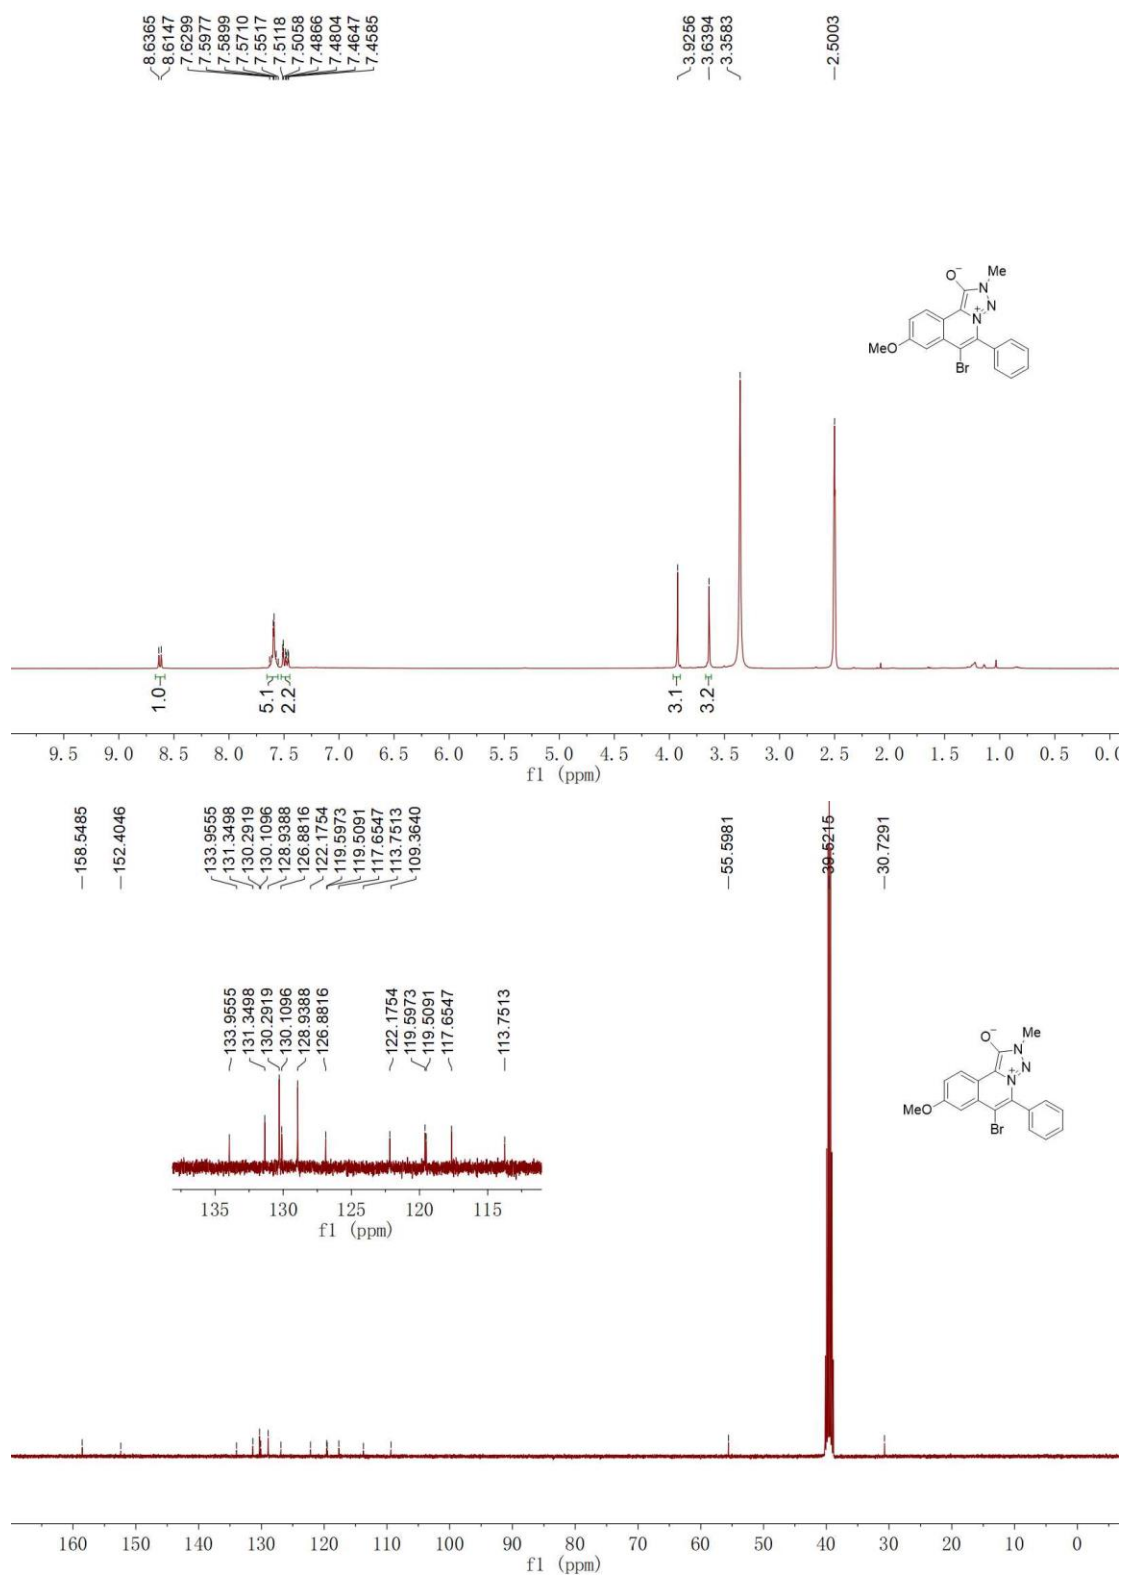

$^1\text{H}$  NMR ( $\text{CDCl}_3$ , 400 MHz) and  $^{13}\text{C}$  NMR ( $\text{CDCl}_3$ , 100 MHz) spectra of **2dc**

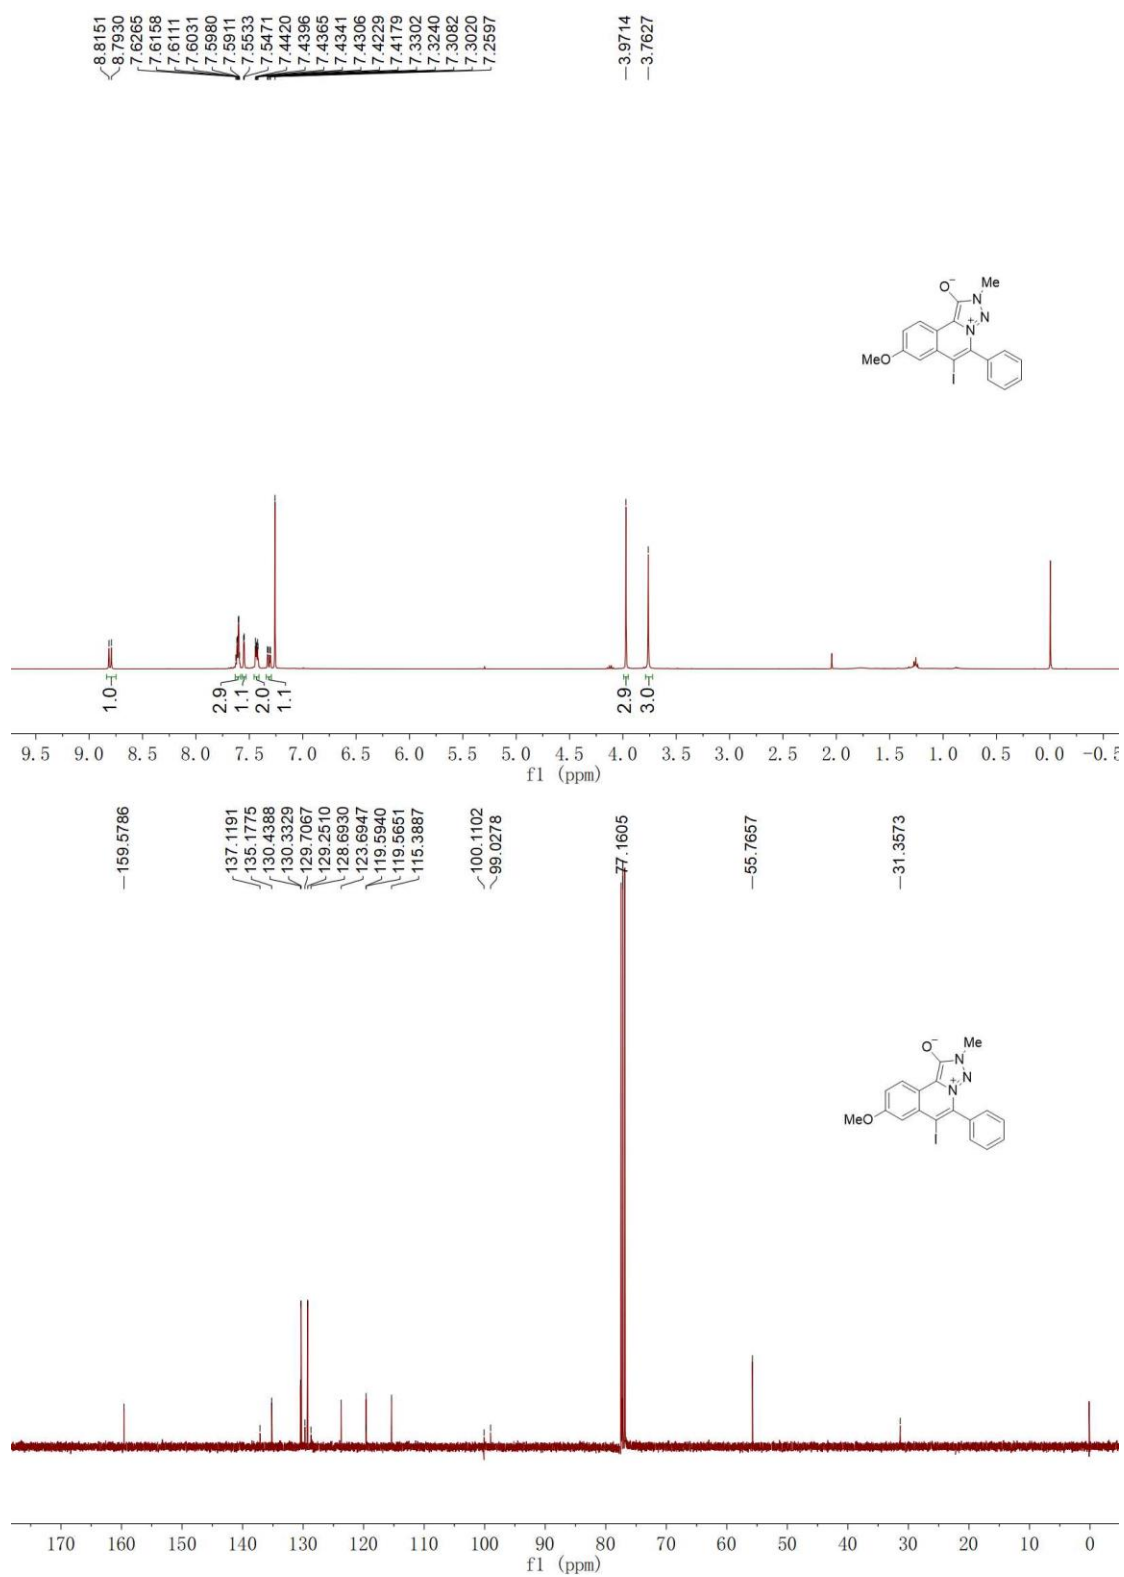



$^1\text{H}$  NMR ( $\text{CDCl}_3$ , 400 MHz) and  $^{13}\text{C}$  NMR ( $\text{CDCl}_3$ , 100 MHz) spectra of **2ea**

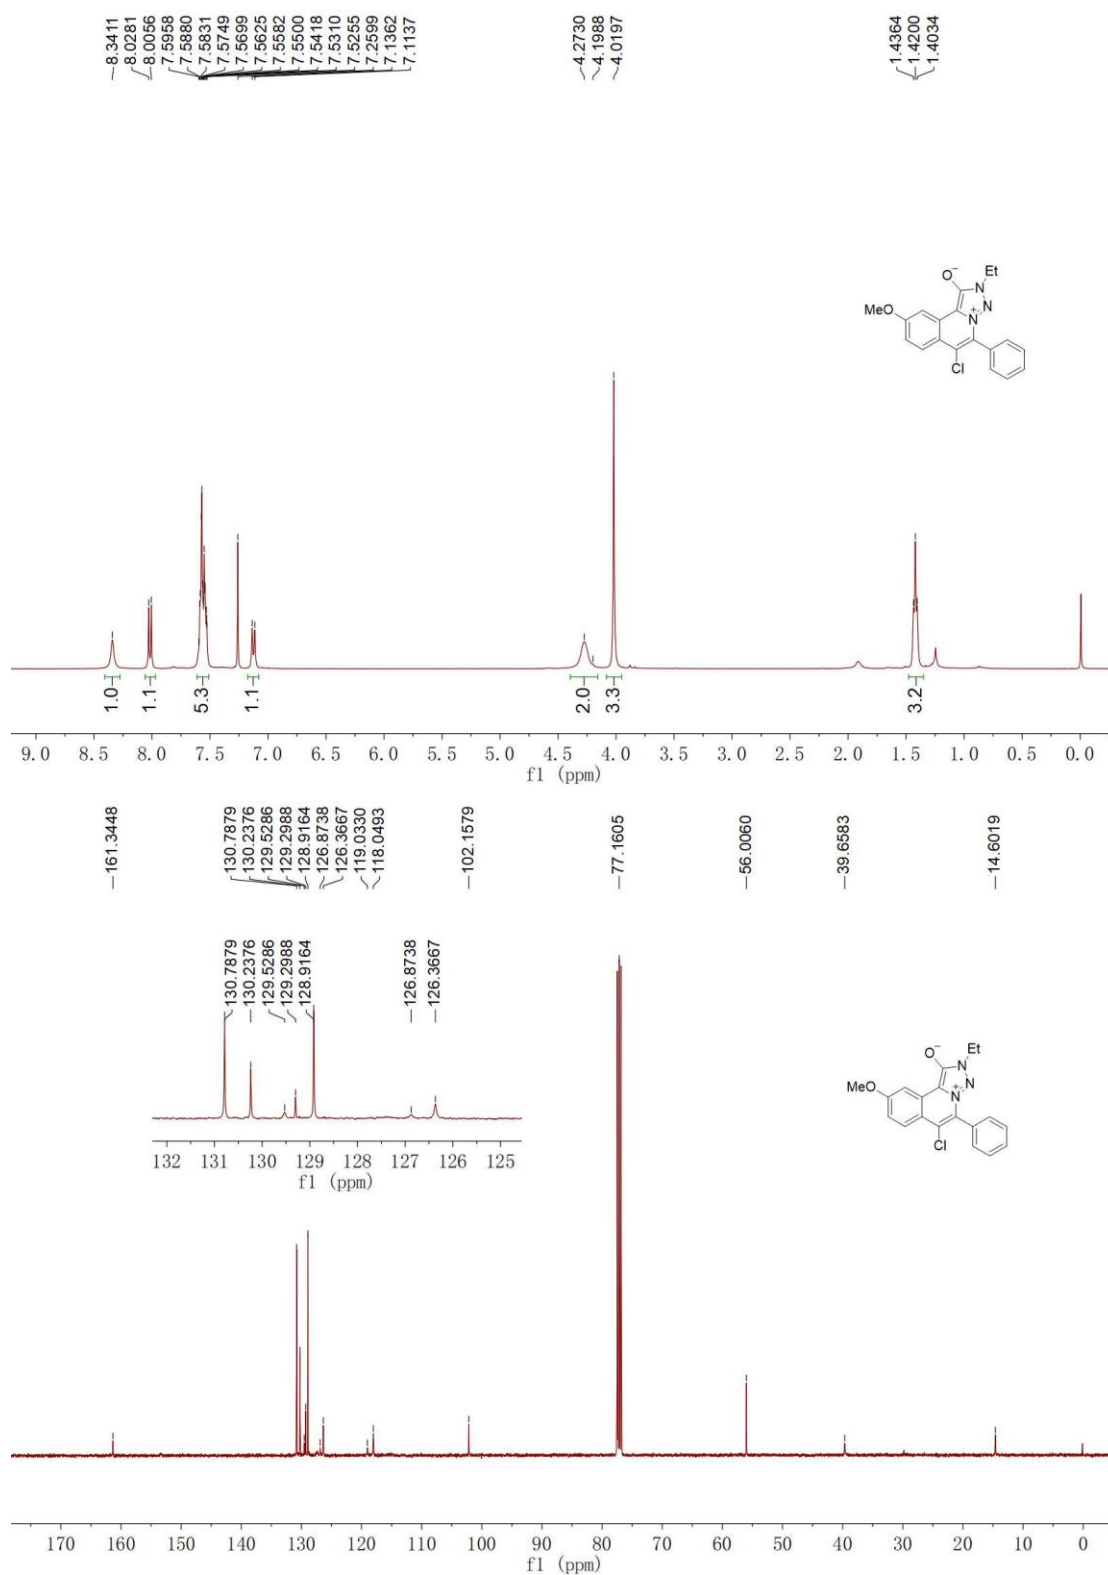

$^1\text{H}$  NMR ( $\text{CDCl}_3$ , 400 MHz) and  $^{13}\text{C}$  NMR ( $\text{CDCl}_3$ , 100 MHz) spectra of **2fa**

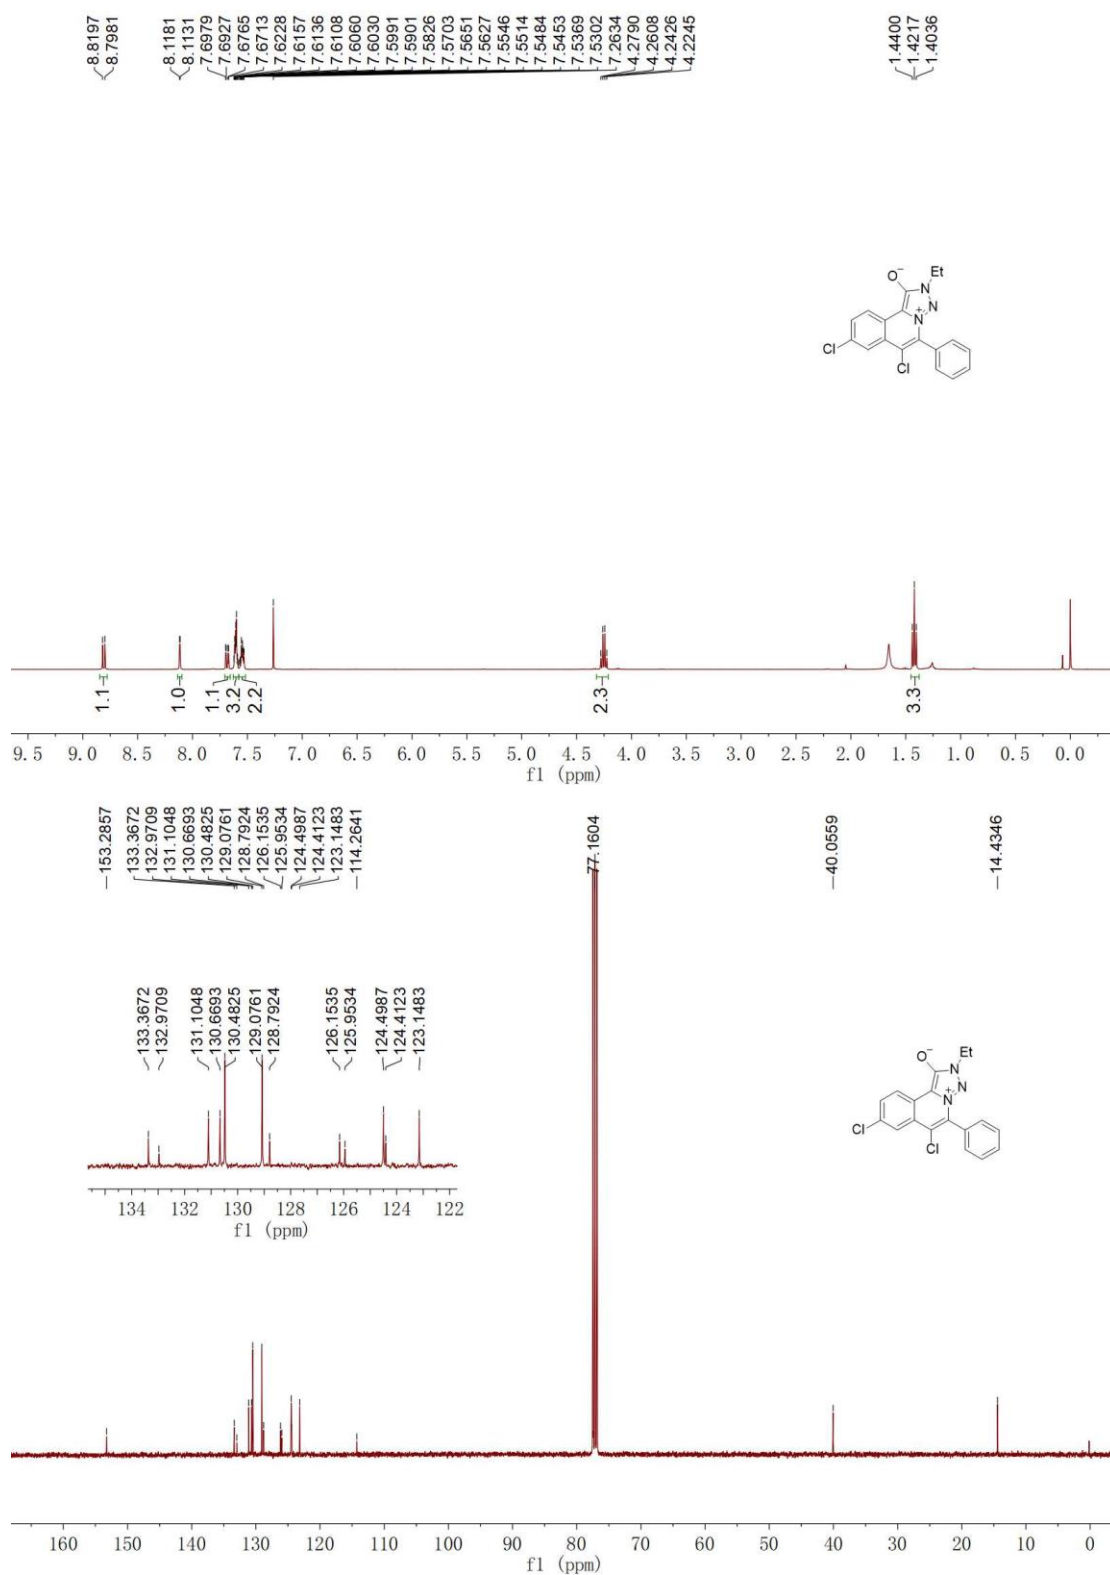

$^1\text{H}$  NMR ( $\text{CDCl}_3$ , 400 MHz) and  $^{13}\text{C}$  NMR ( $\text{CDCl}_3$ , 100 MHz) spectra of **2fc**

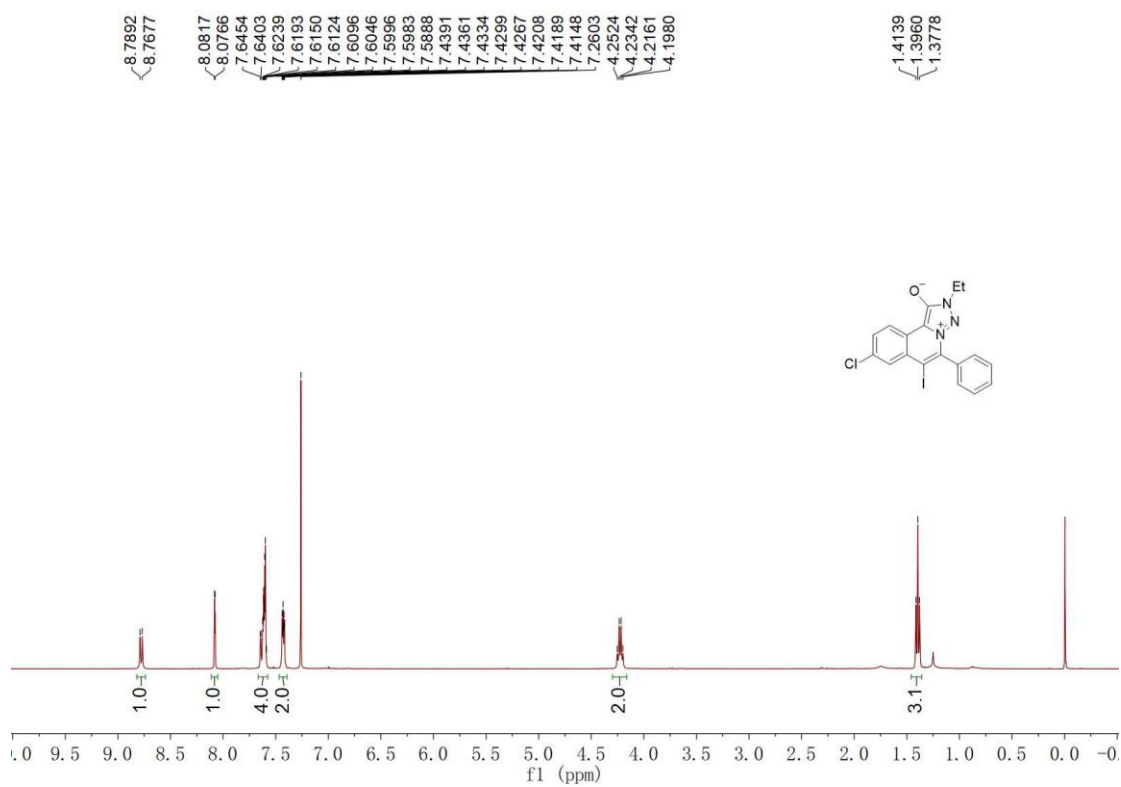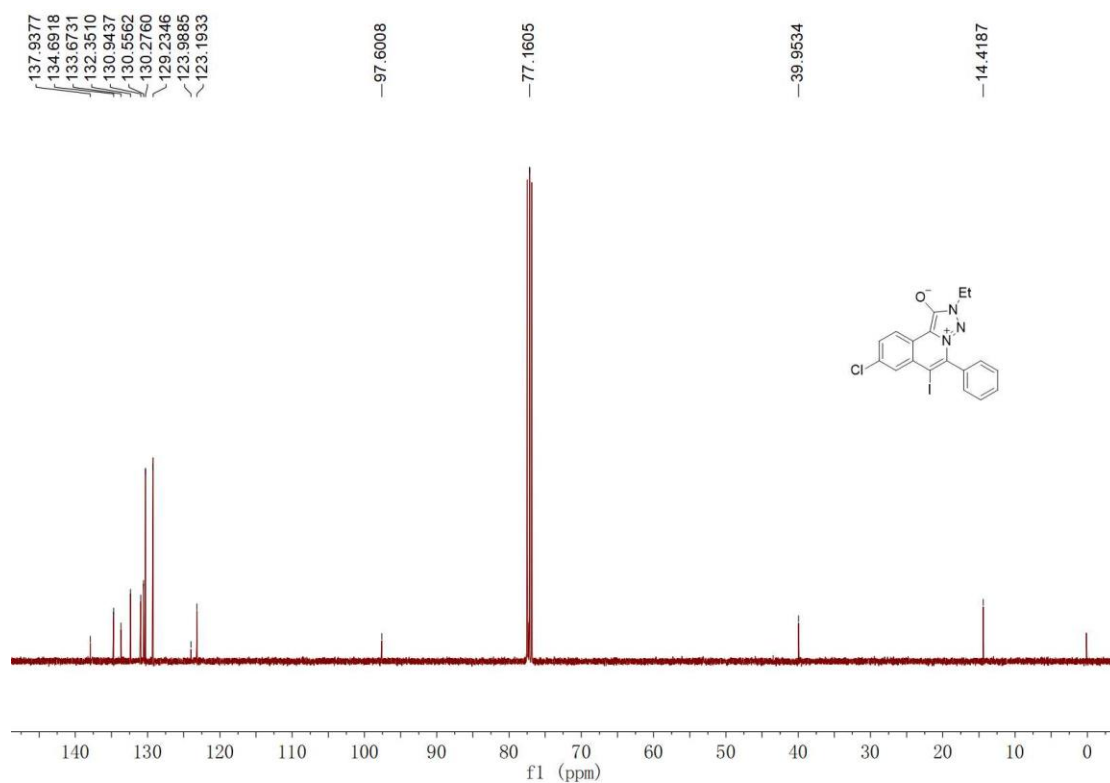

$^1\text{H}$  NMR ( $\text{CDCl}_3$ , 400 MHz),  $^{13}\text{C}$  NMR ( $\text{CDCl}_3$ , 100 MHz) and  $^{19}\text{F}$  NMR ( $\text{CDCl}_3$ , 376 MHz) spectra of **2ga**

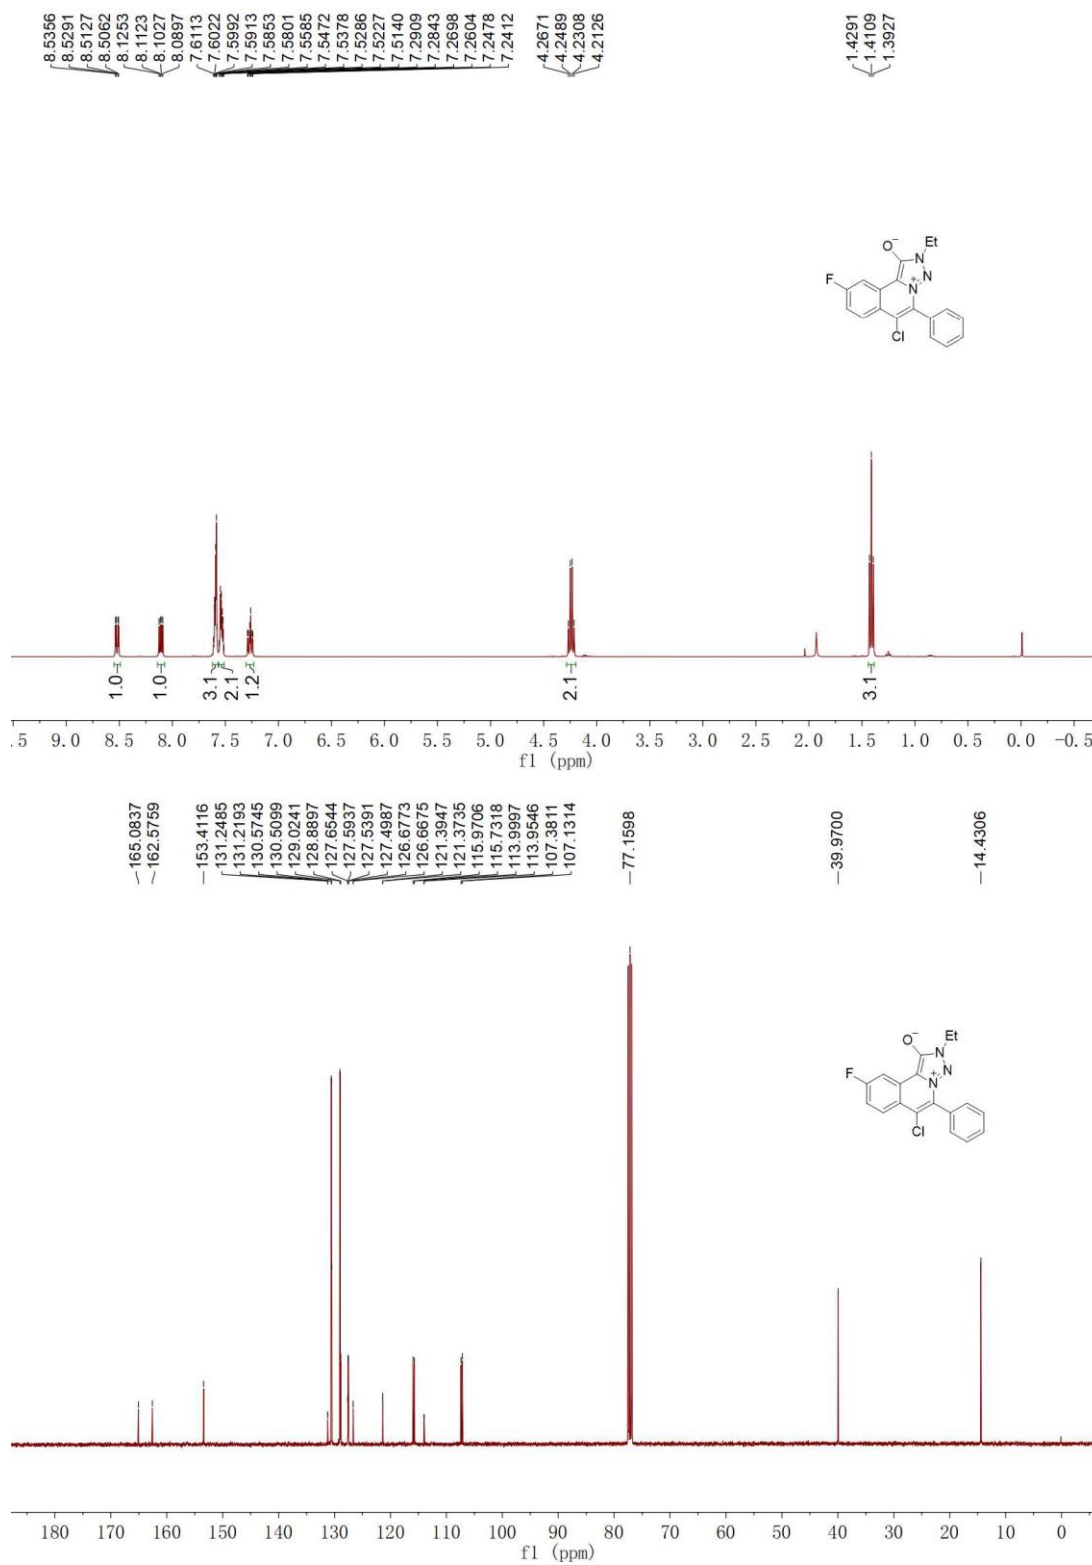

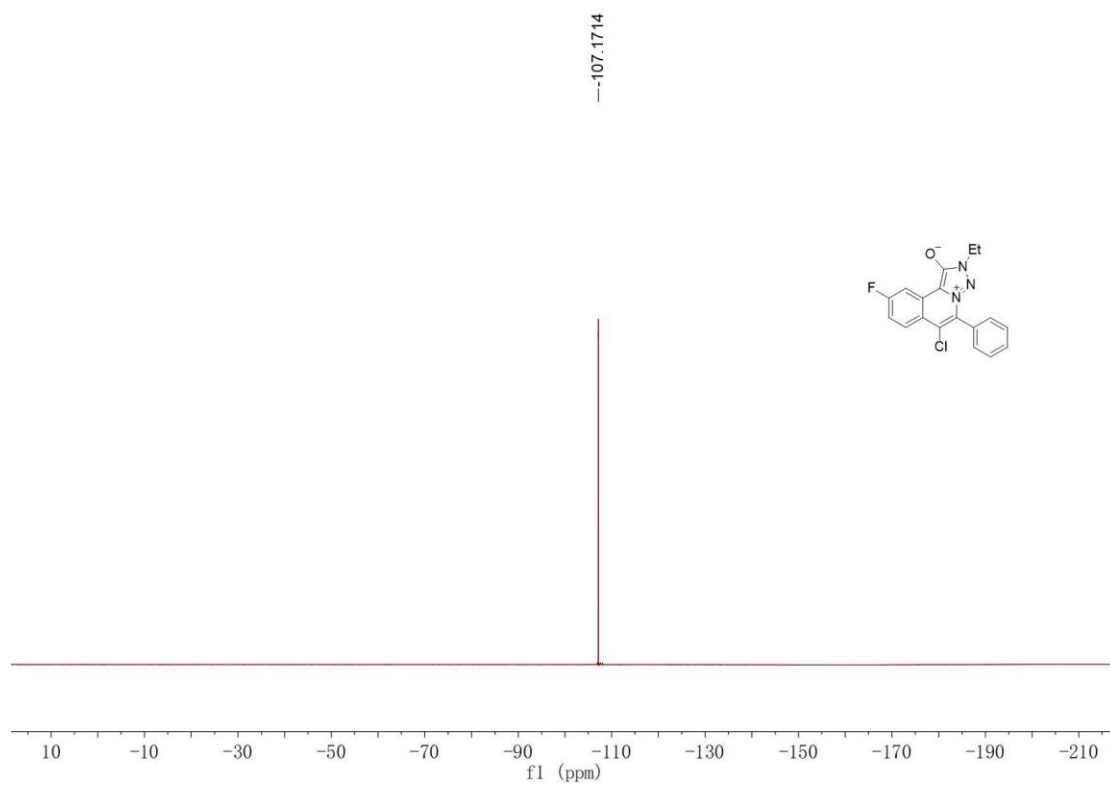

$^1\text{H}$  NMR ( $\text{CDCl}_3$ , 400 MHz),  $^{13}\text{C}$  NMR ( $\text{CDCl}_3$ , 100 MHz) and  $^{19}\text{F}$  NMR ( $\text{CDCl}_3$ , 376 MHz) spectra of **2ha**

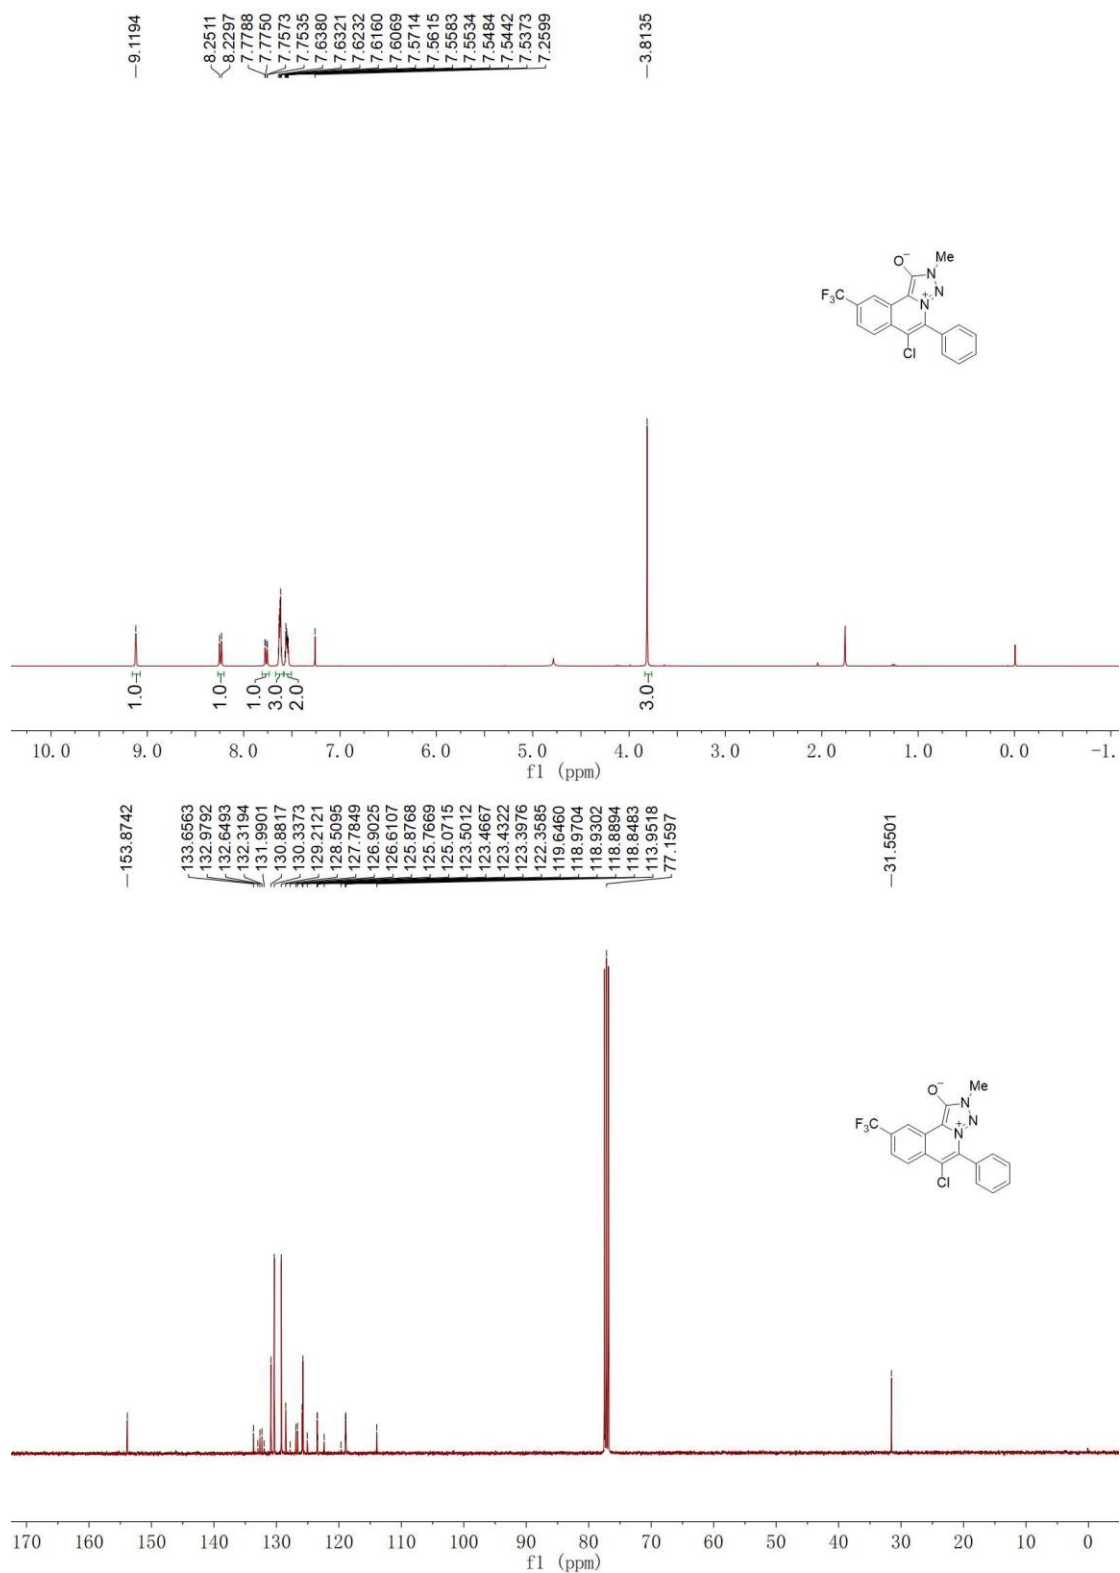

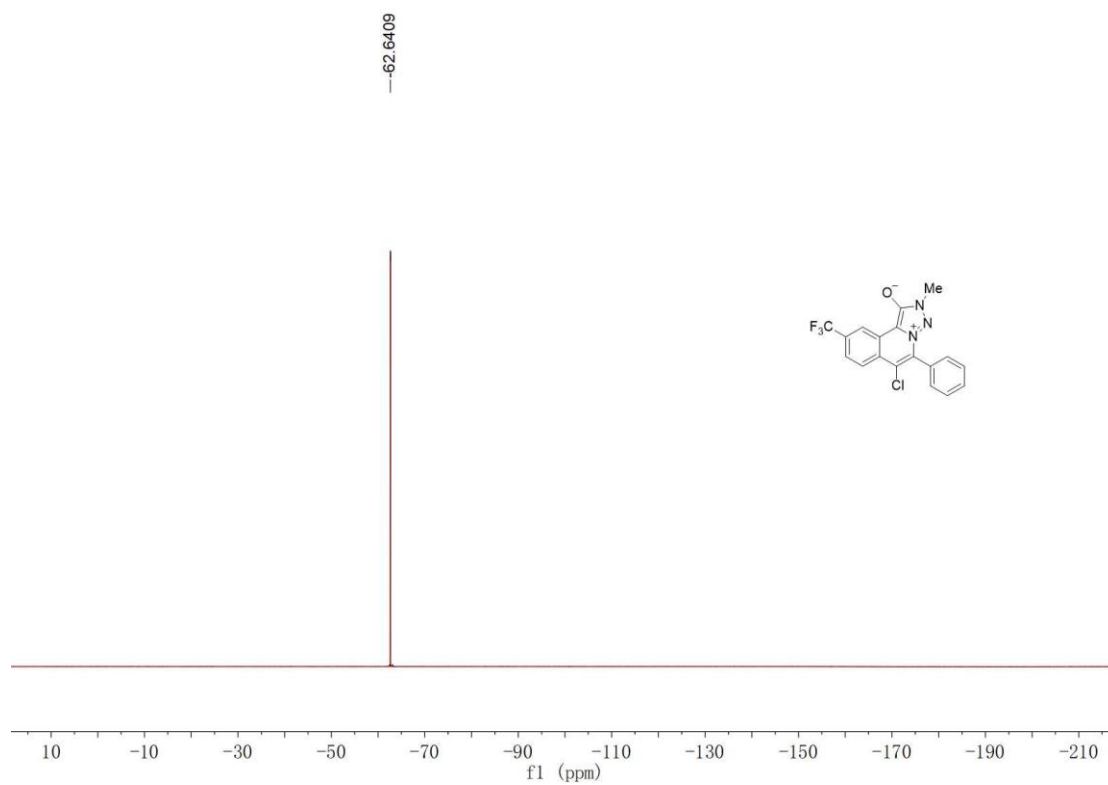

$^1\text{H}$  NMR ( $\text{CDCl}_3$ , 400 MHz) and  $^{13}\text{C}$  NMR ( $\text{CDCl}_3$ , 100 MHz) spectra of **2ia**

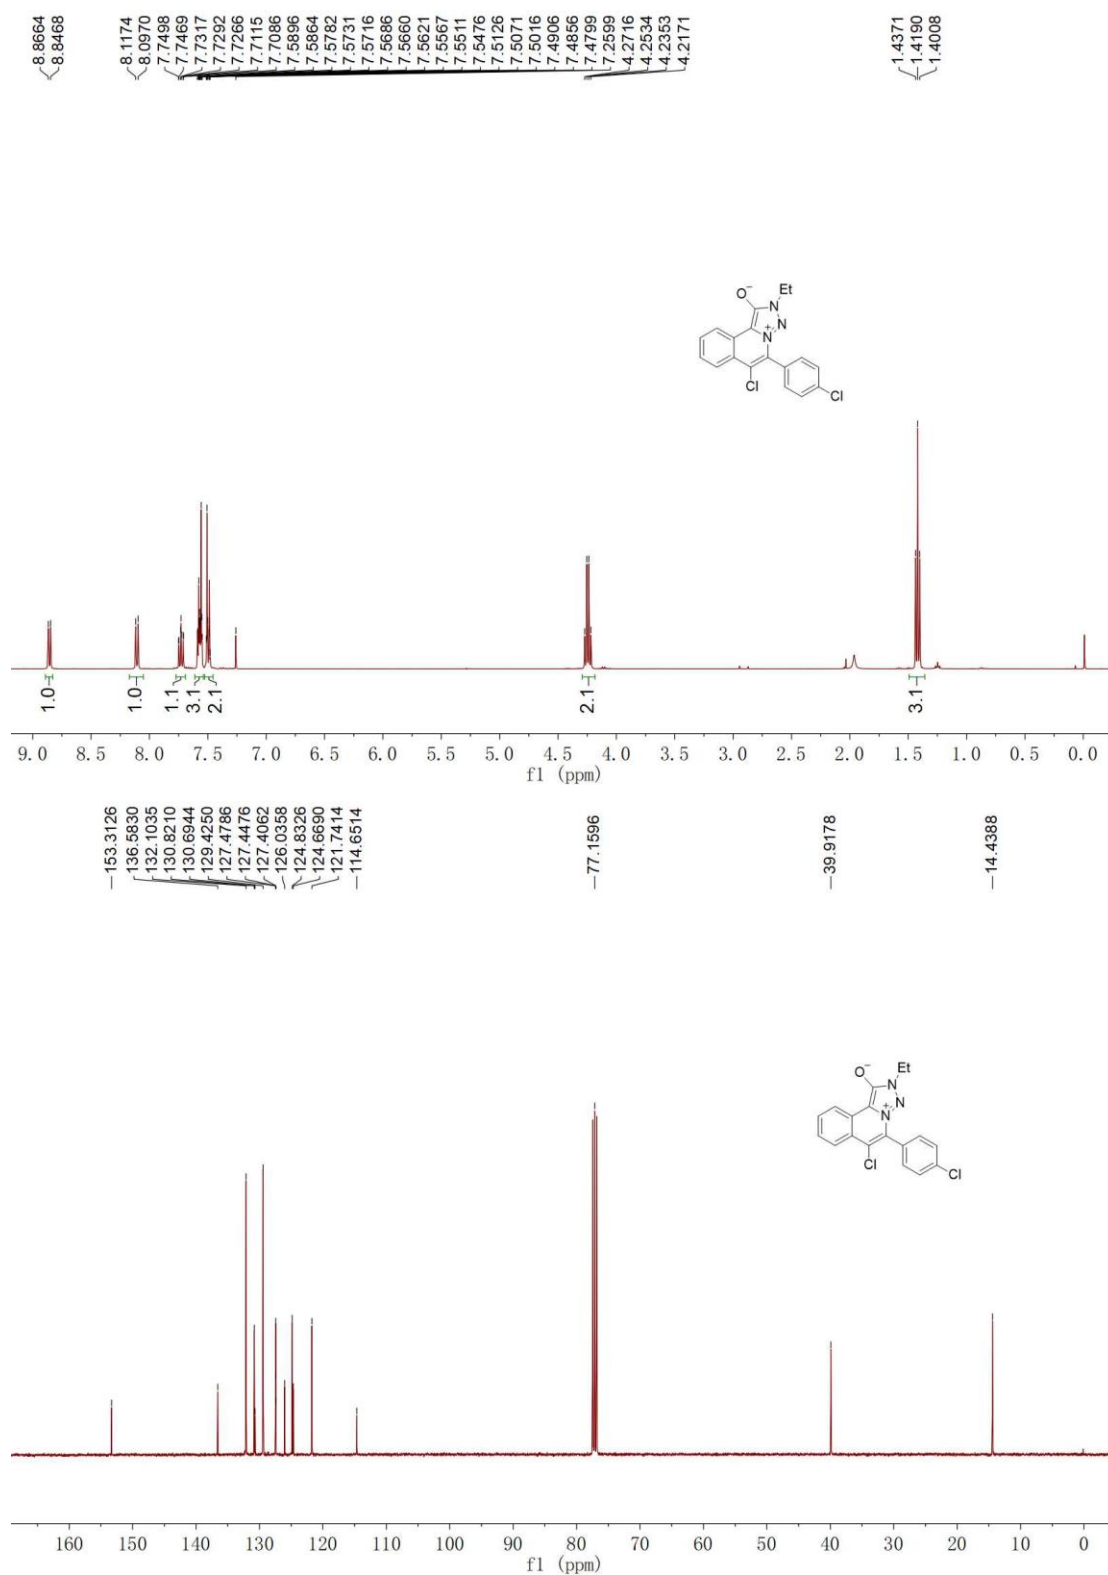



[illegible]

$^1\text{H}$  NMR ( $\text{CDCl}_3$ , 400 MHz) and  $^{13}\text{C}$  NMR ( $\text{CDCl}_3$ , 100 MHz) spectra of **2ic**

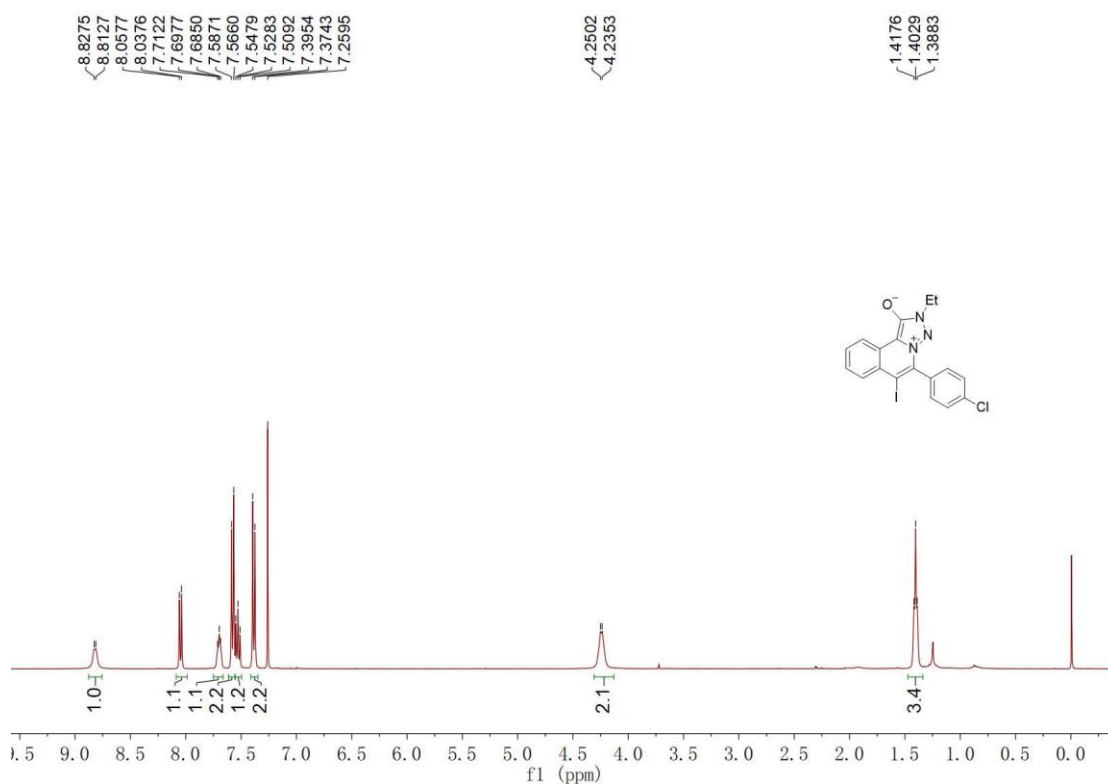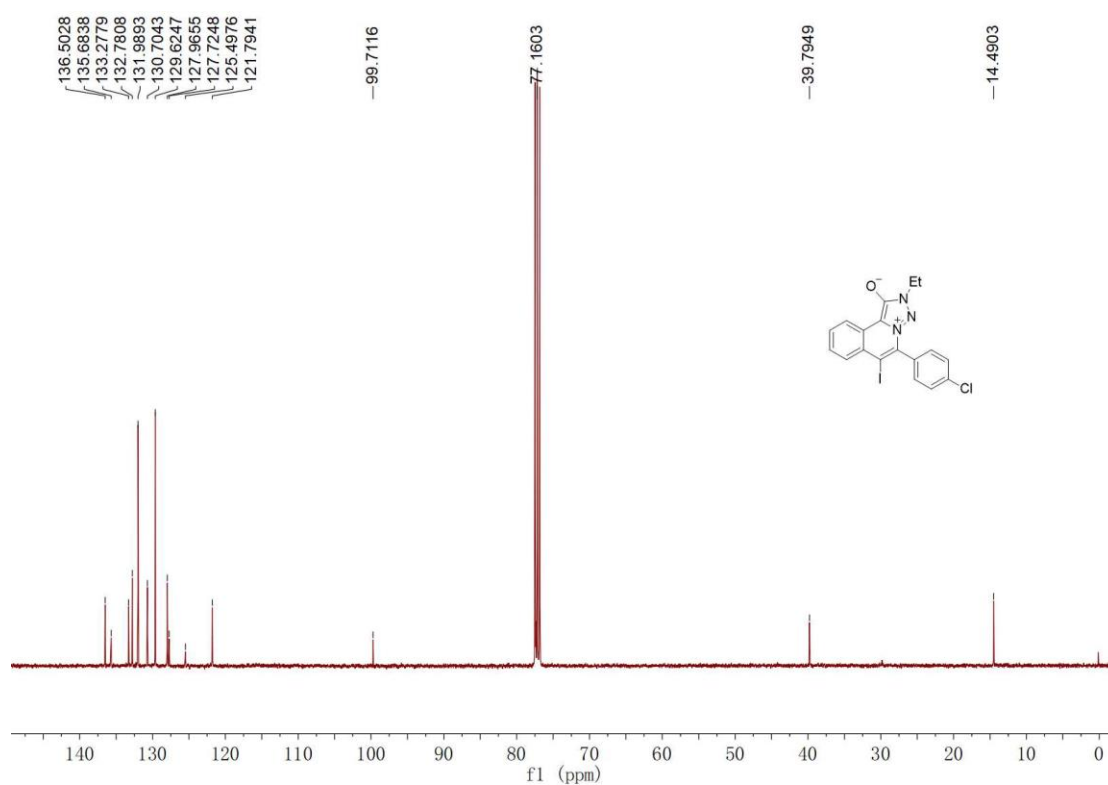

$^1\text{H}$  NMR ( $\text{CDCl}_3$ , 400 MHz),  $^{13}\text{C}$  NMR ( $\text{CDCl}_3$ , 100 MHz) and  $^{19}\text{F}$  NMR ( $\text{CDCl}_3$ , 376 MHz) spectra of **2ja**

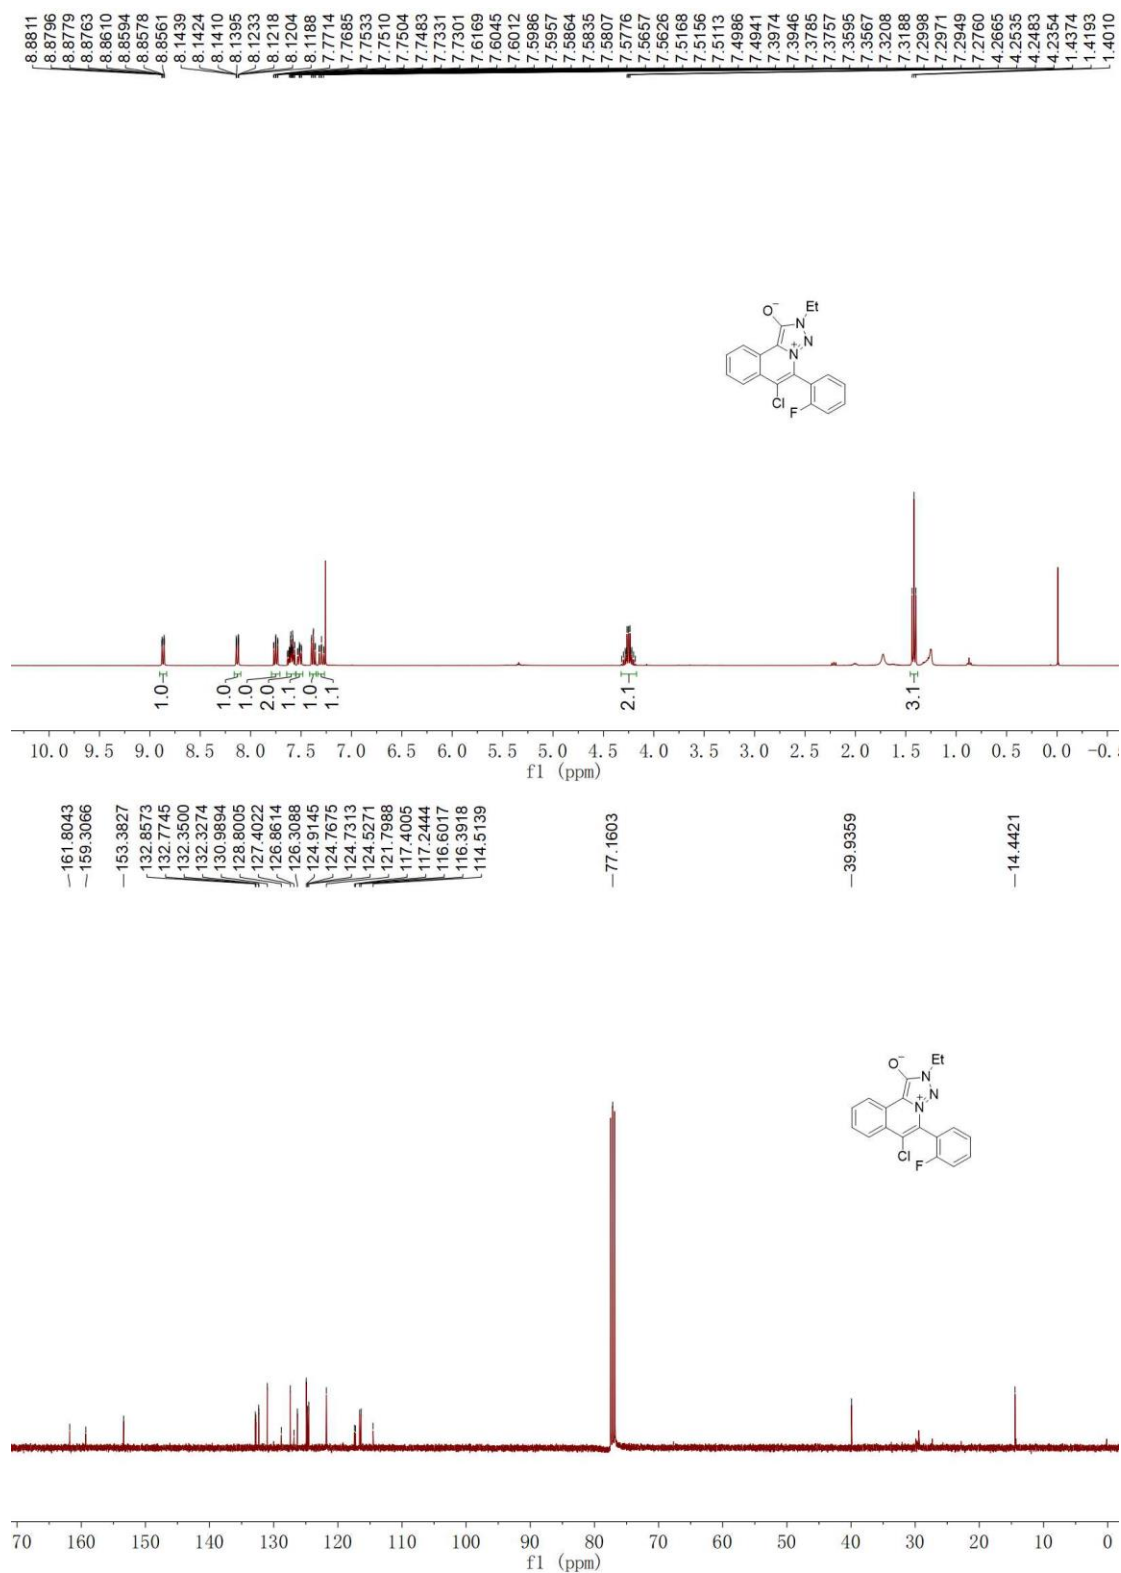

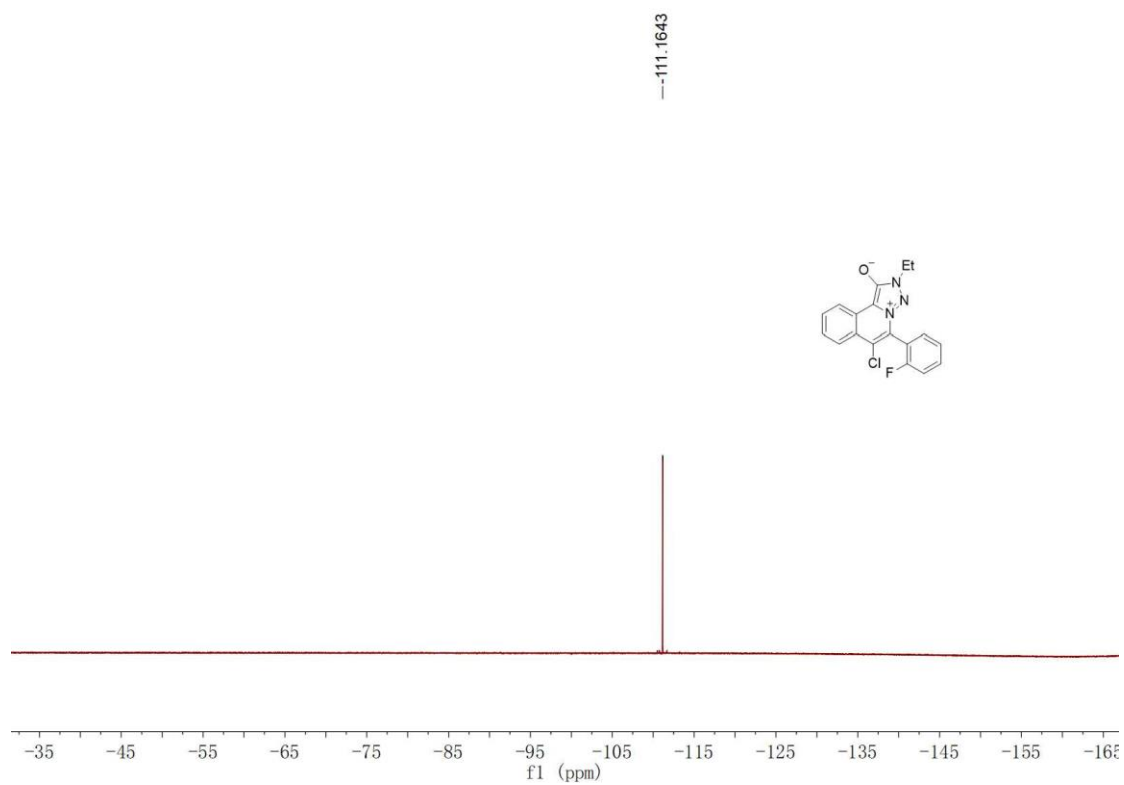

$^1\text{H}$  NMR ( $\text{CDCl}_3$ , 400 MHz),  $^{13}\text{C}$  NMR ( $\text{CDCl}_3$ , 100 MHz) and  $^{19}\text{F}$  NMR ( $\text{CDCl}_3$ , 376 MHz) spectra of **2jc**

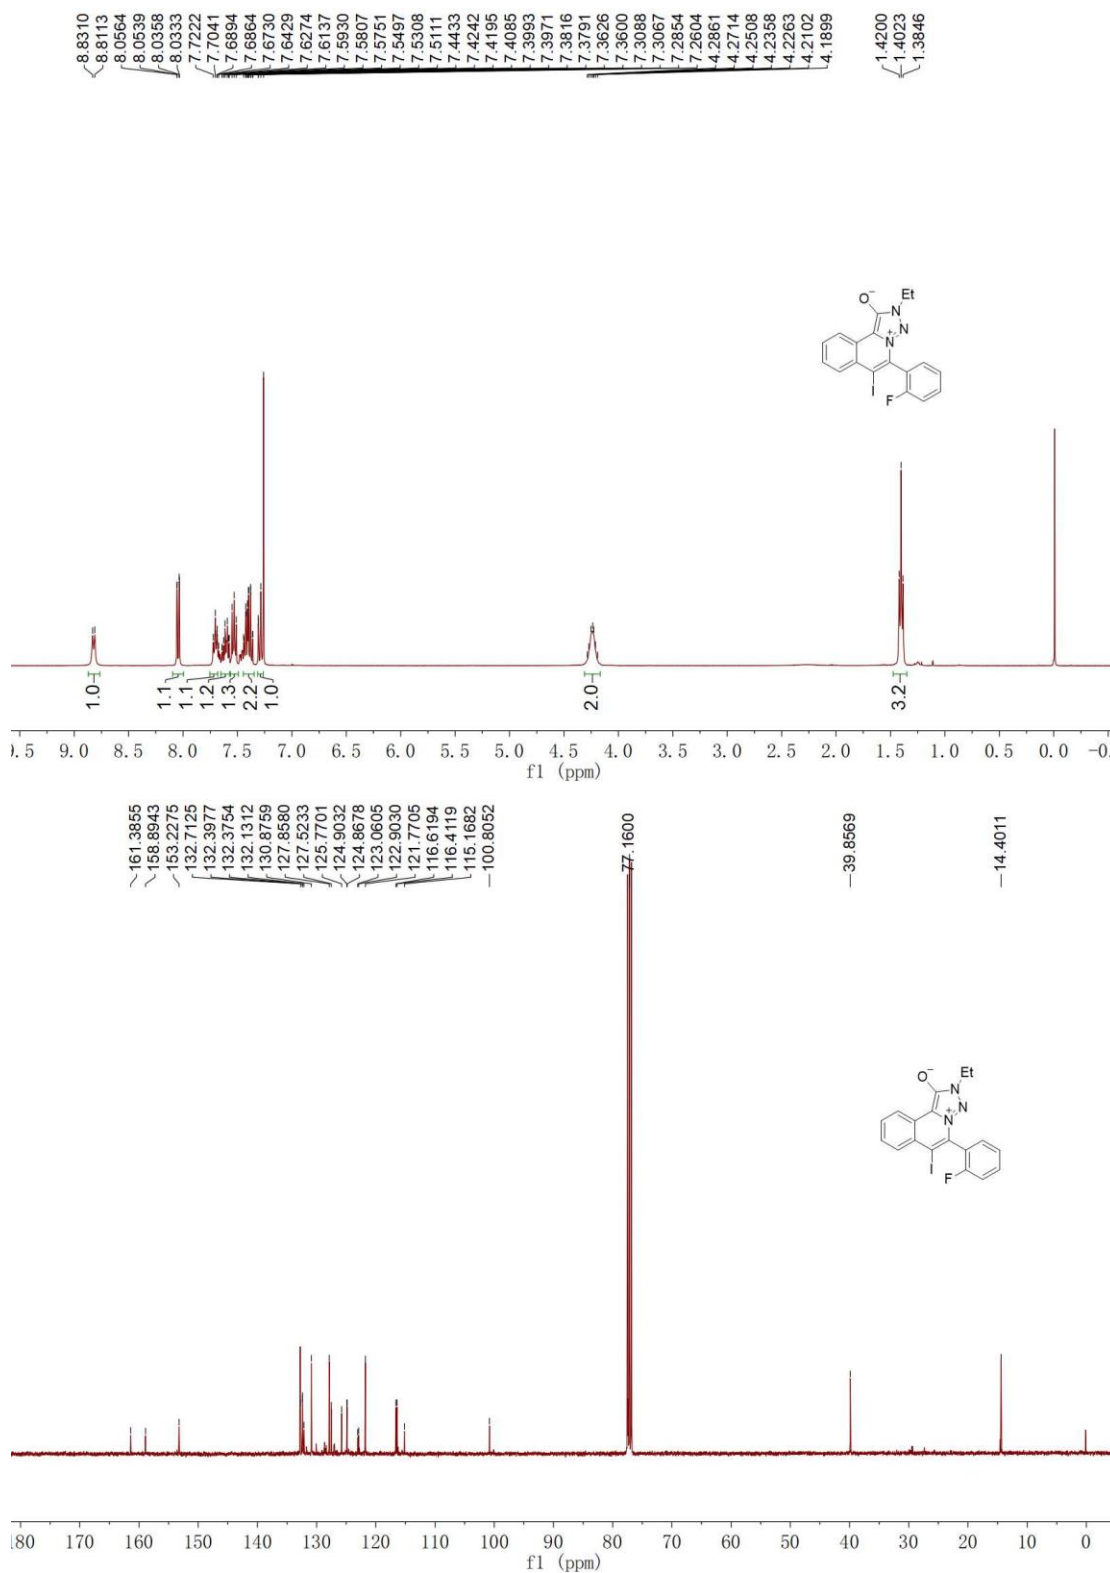

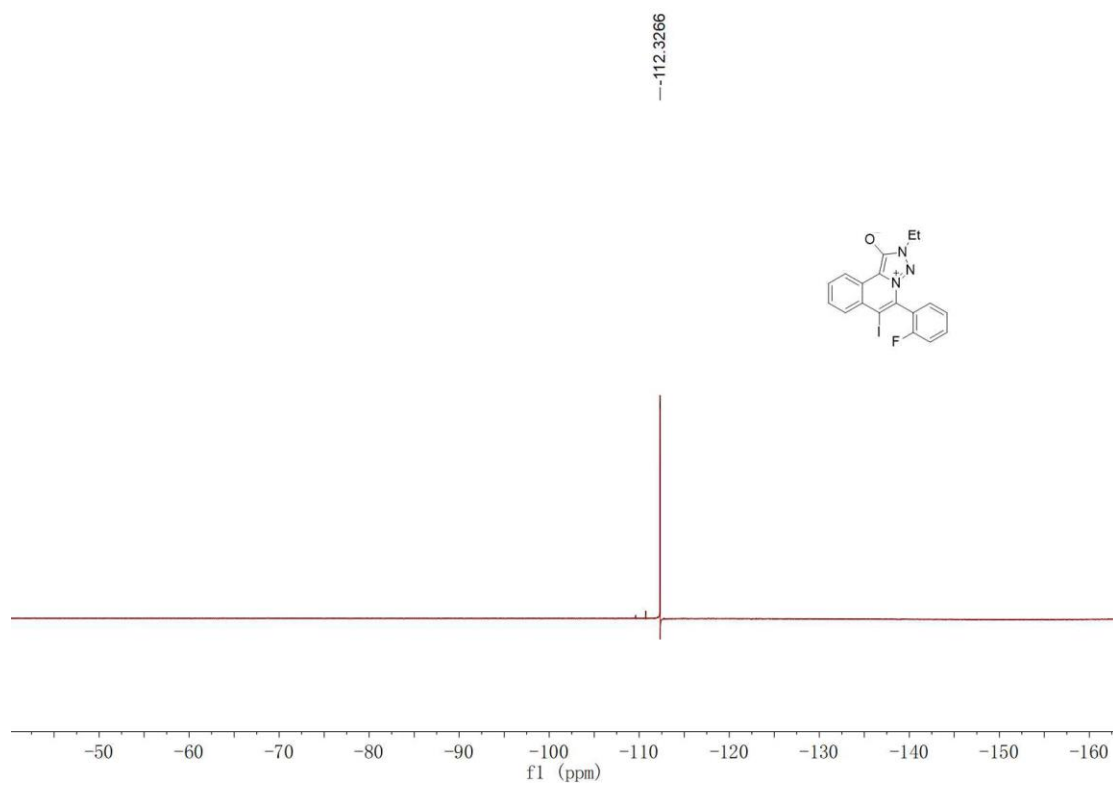

$^1\text{H}$  NMR ( $\text{CDCl}_3$ , 400 MHz) and  $^{13}\text{C}$  NMR ( $\text{CDCl}_3$ , 100 MHz) spectra of **2kc**

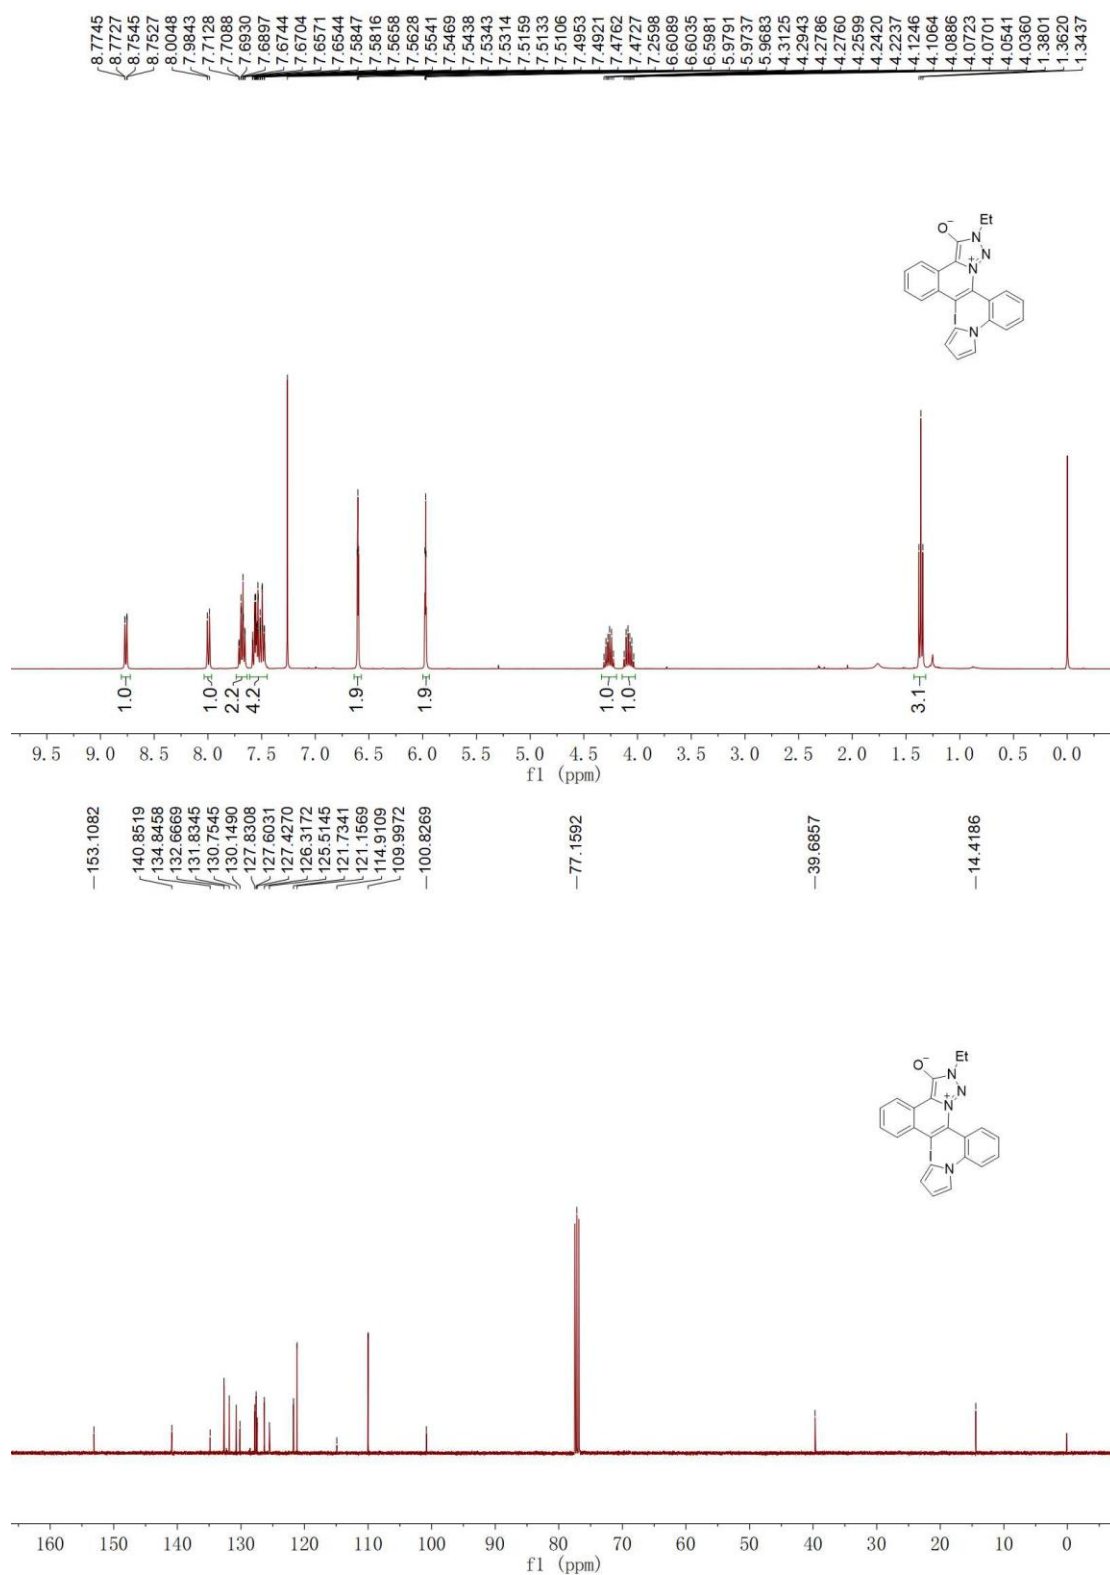

$^1\text{H}$  NMR ( $\text{CDCl}_3$ , 400 MHz) and  $^{13}\text{C}$  NMR ( $\text{CDCl}_3$ , 100 MHz) spectra of **2lc**

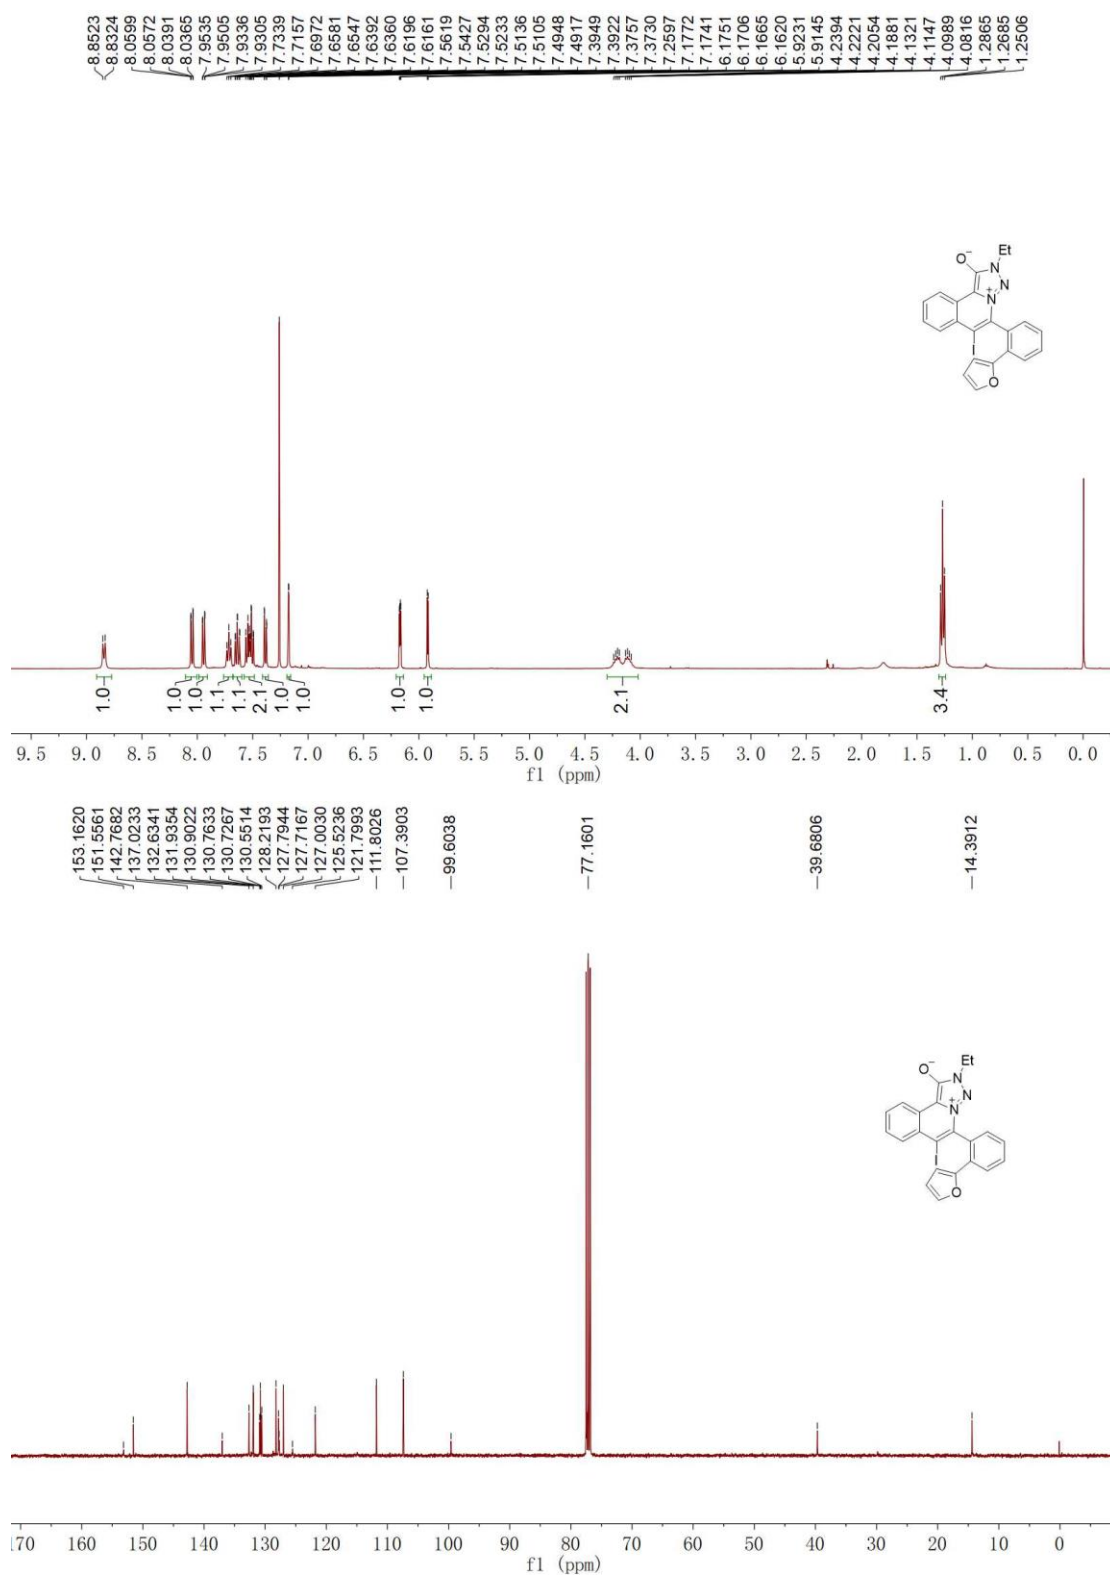



$^1\text{H}$  NMR ( $\text{CDCl}_3$ , 400 MHz) and  $^{13}\text{C}$  NMR ( $\text{CDCl}_3$ , 100 MHz) spectra of **2ma**

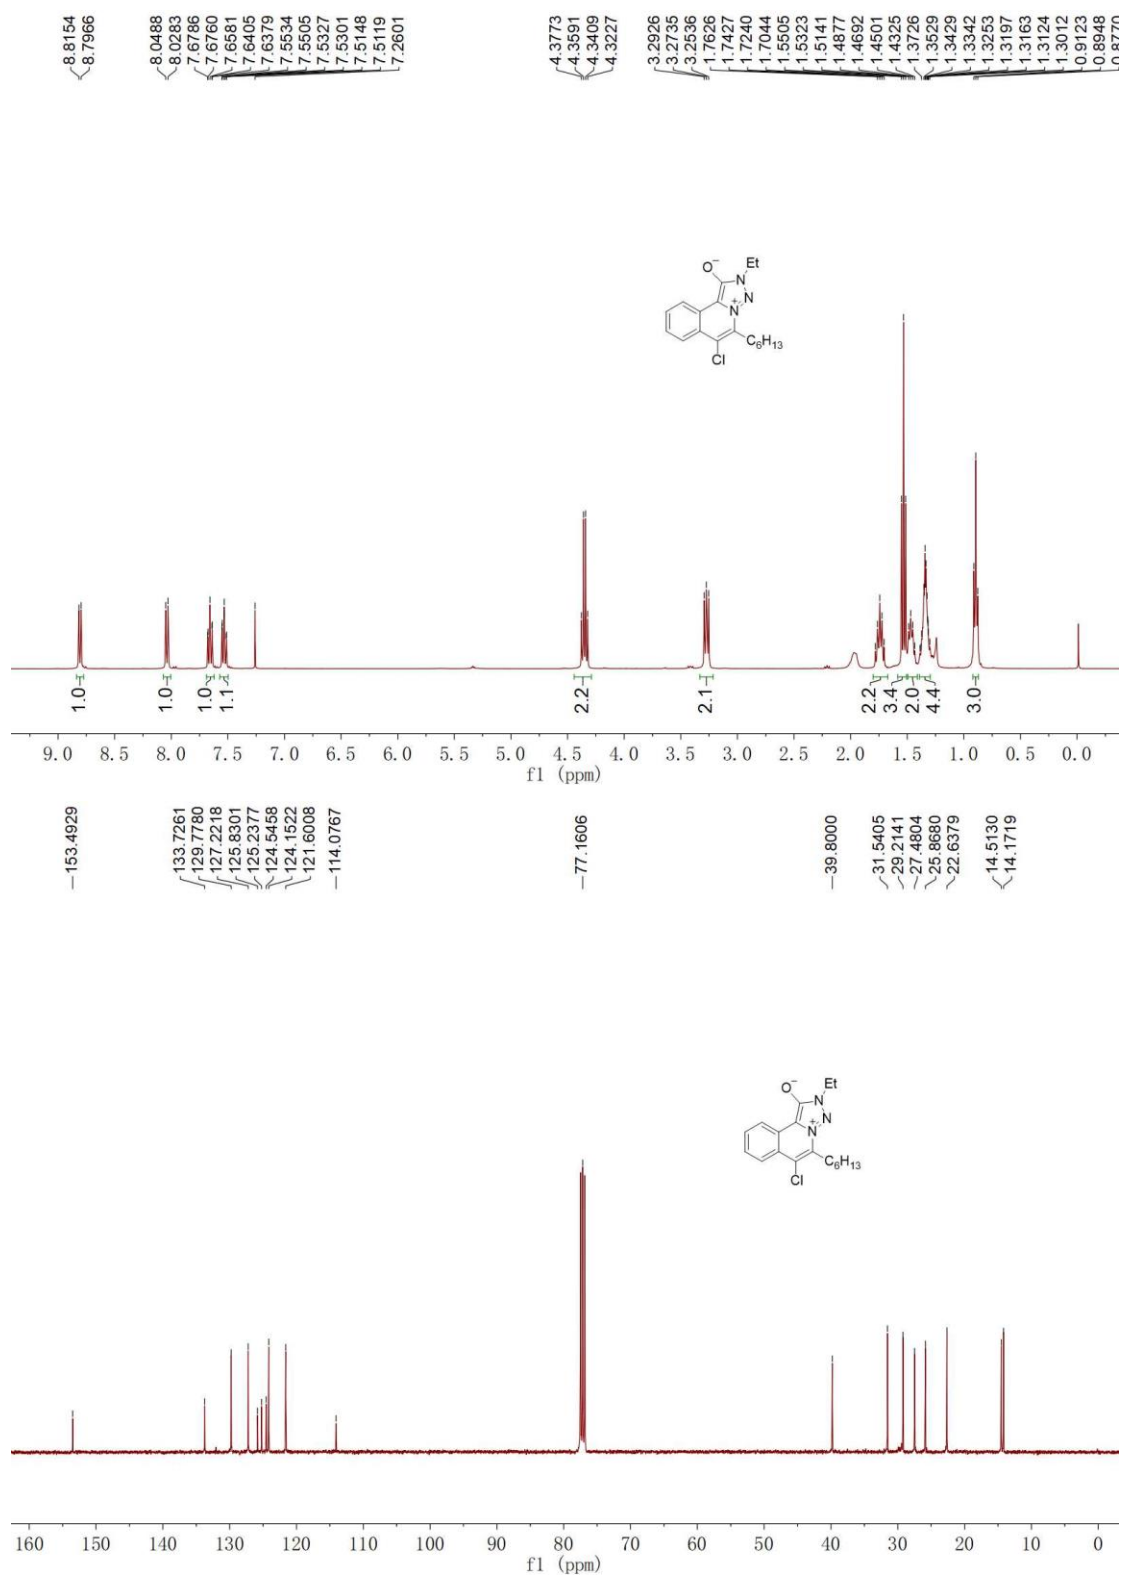

$^1\text{H}$  NMR ( $\text{CDCl}_3$ , 400 MHz) and  $^{13}\text{C}$  NMR ( $\text{CDCl}_3$ , 100 MHz) spectra of **2na**

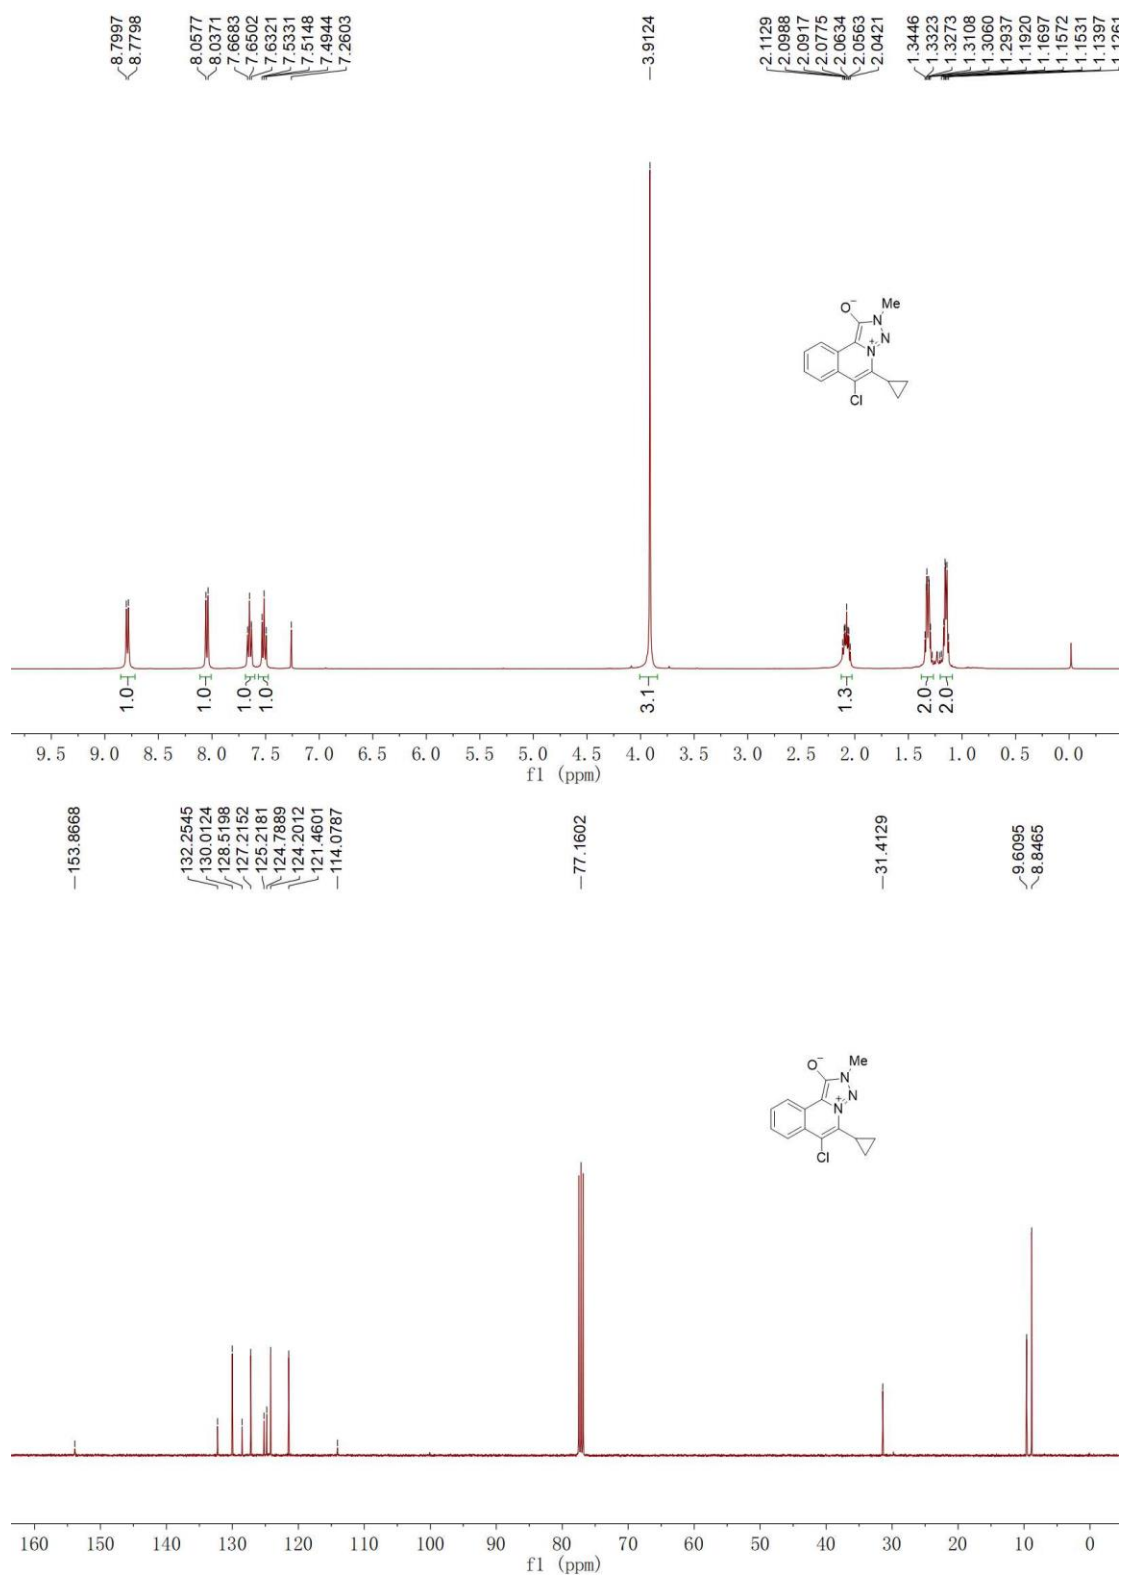

$^1\text{H}$  NMR ( $\text{CDCl}_3$ , 400 MHz) and  $^{13}\text{C}$  NMR ( $\text{CDCl}_3$ , 100 MHz) spectra of **20c**

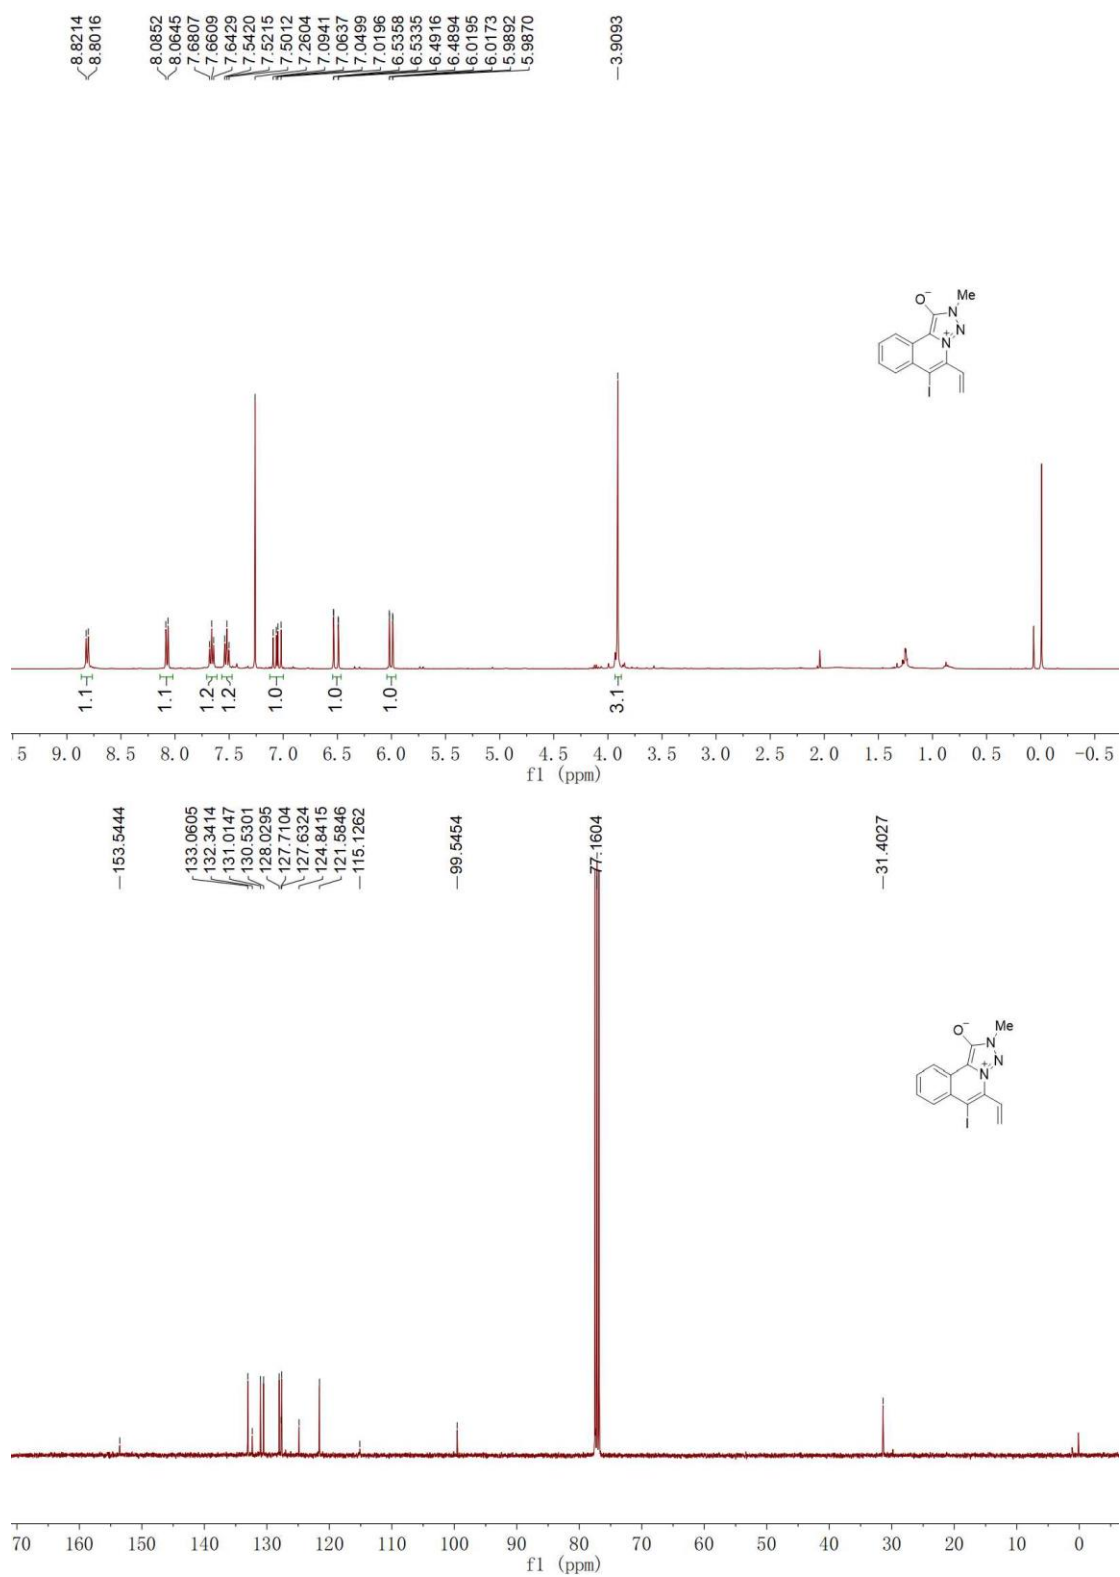

$^1\text{H}$  NMR ( $\text{CDCl}_3$ , 400 MHz) and  $^{13}\text{C}$  NMR ( $\text{CDCl}_3$ , 100 MHz) spectra of **2pa**

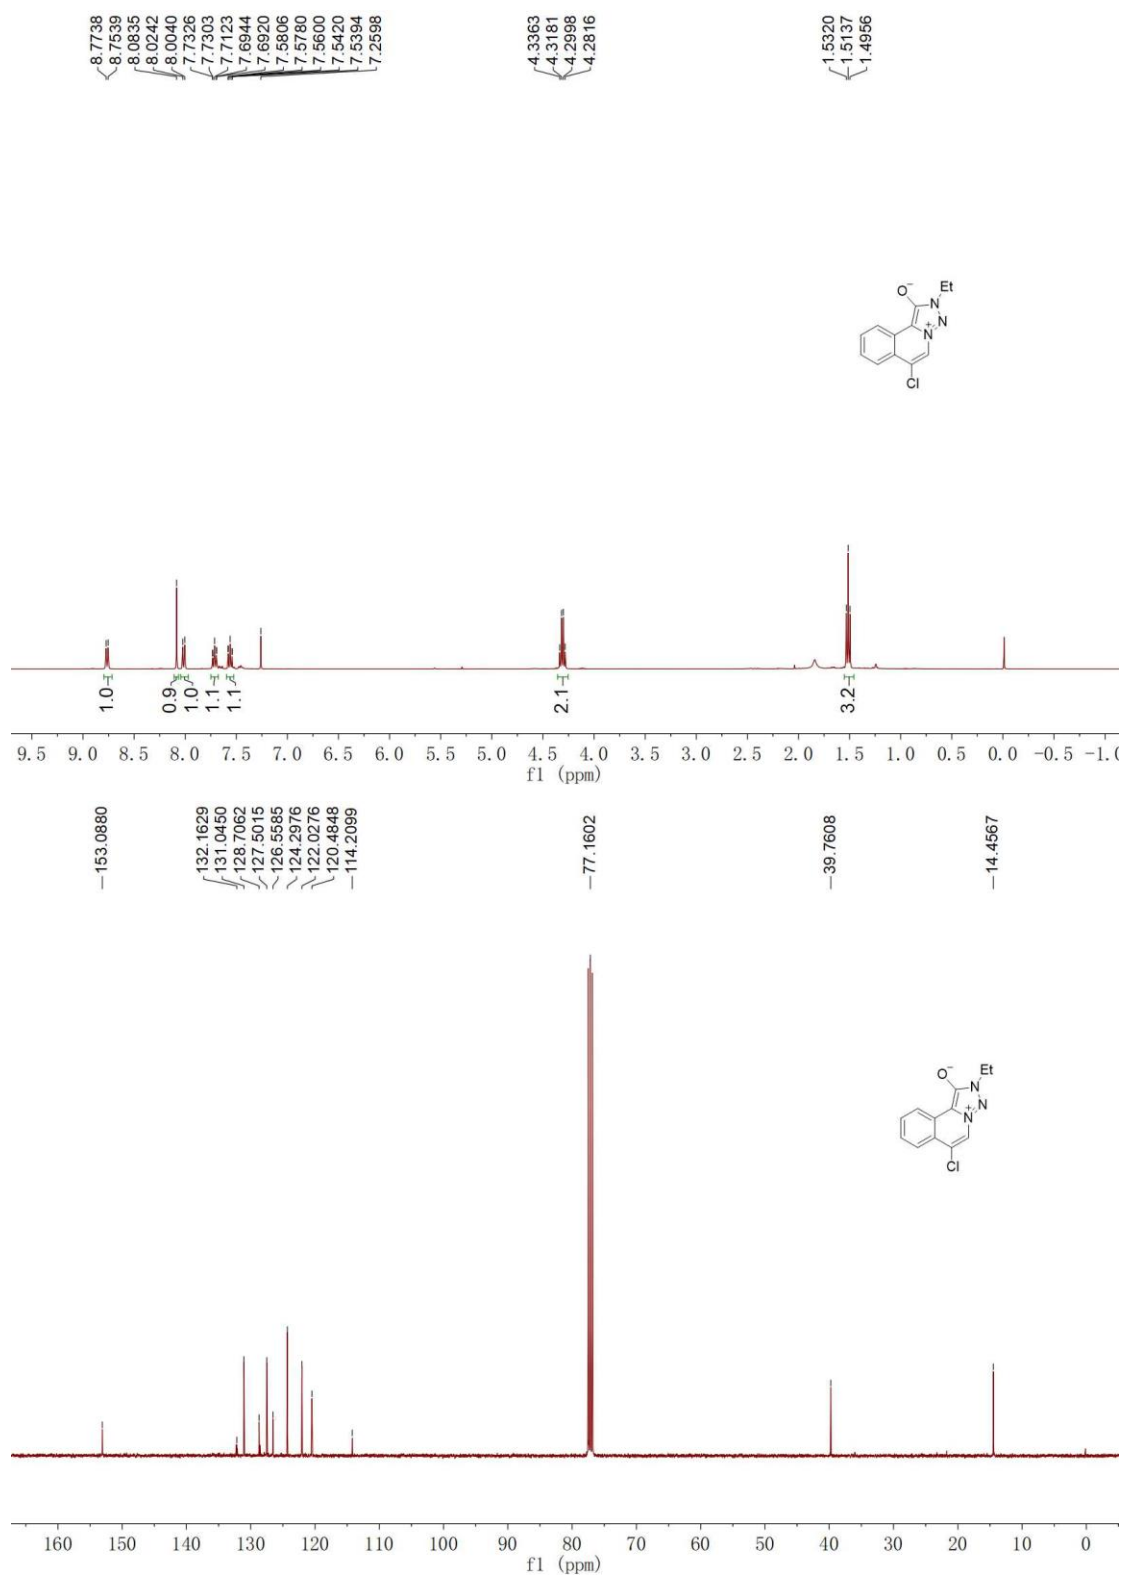

$^1\text{H}$  NMR ( $\text{CDCl}_3$ , 400 MHz) and  $^{13}\text{C}$  NMR ( $\text{CDCl}_3$ , 100 MHz) spectra of **3aa**

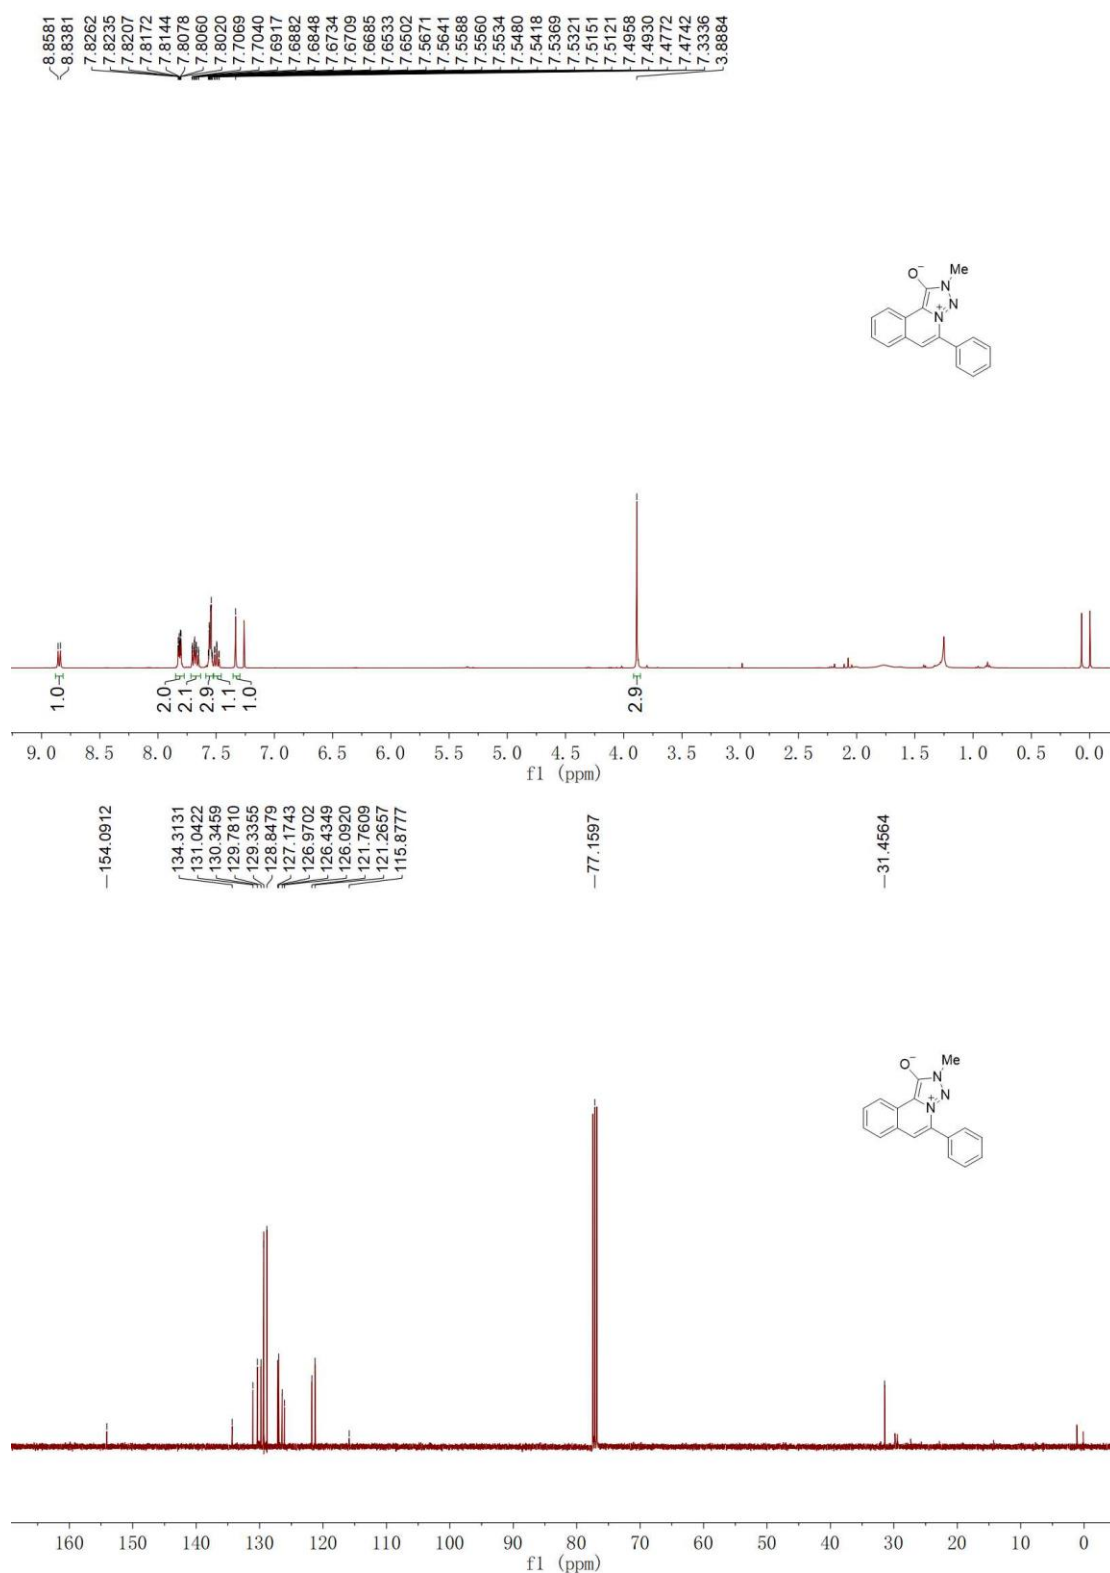

$^1\text{H}$  NMR ( $\text{CDCl}_3$ , 400 MHz) and  $^{13}\text{C}$  NMR ( $\text{CDCl}_3$ , 100 MHz) spectra of **4a**

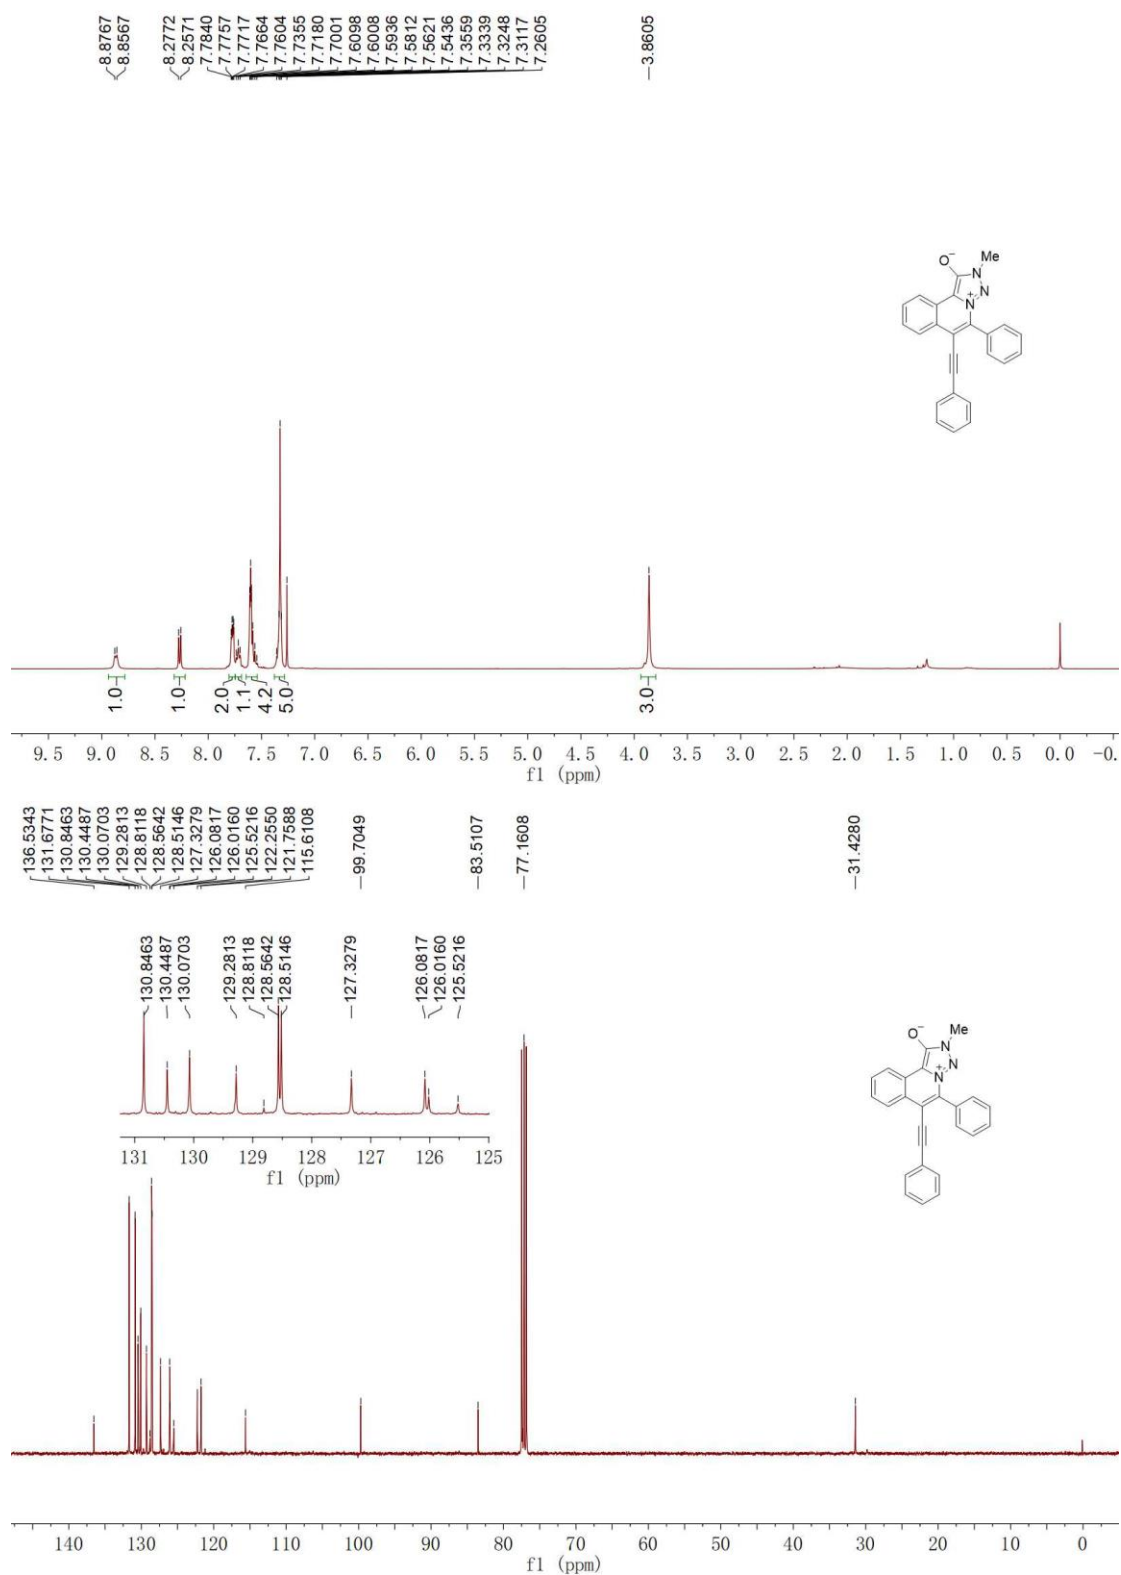

$^1\text{H}$  NMR ( $\text{CDCl}_3$ , 400 MHz) and  $^{13}\text{C}$  NMR ( $\text{CDCl}_3$ , 100 MHz) spectra of **4b**

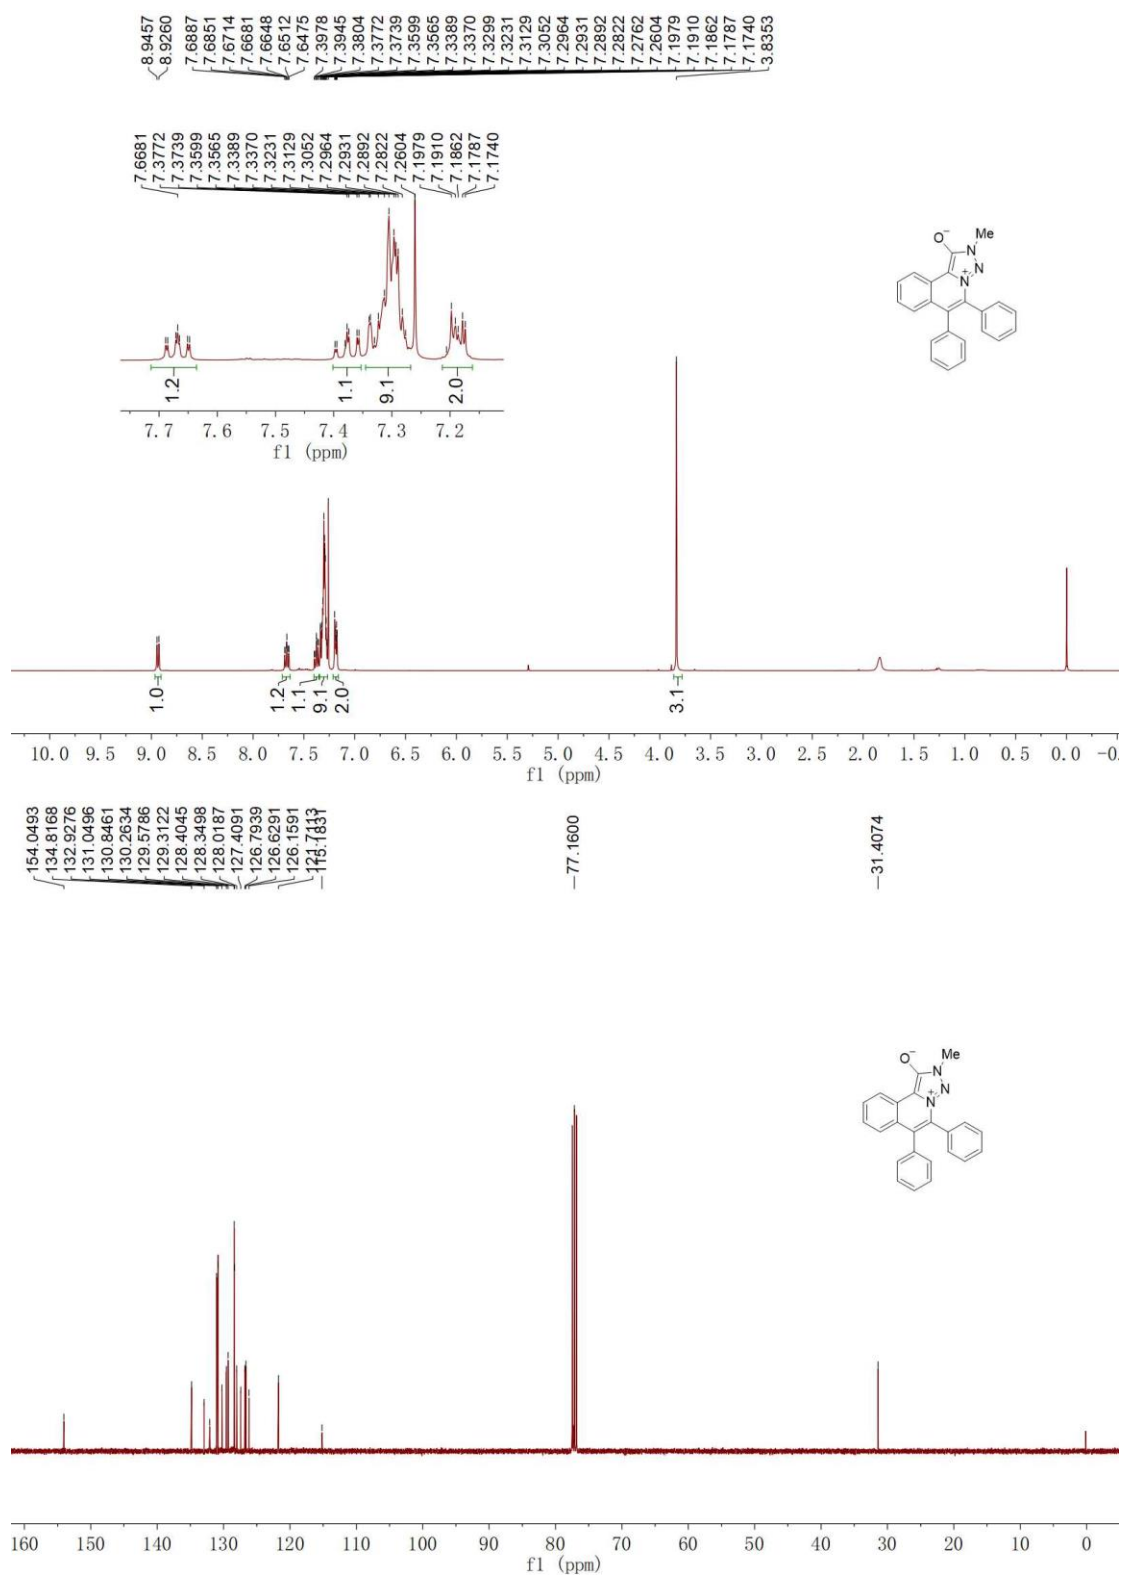

$^1\text{H}$  NMR ( $\text{CDCl}_3$ , 400 MHz) and  $^{13}\text{C}$  NMR ( $\text{CDCl}_3$ , 100 MHz) spectra of **5**

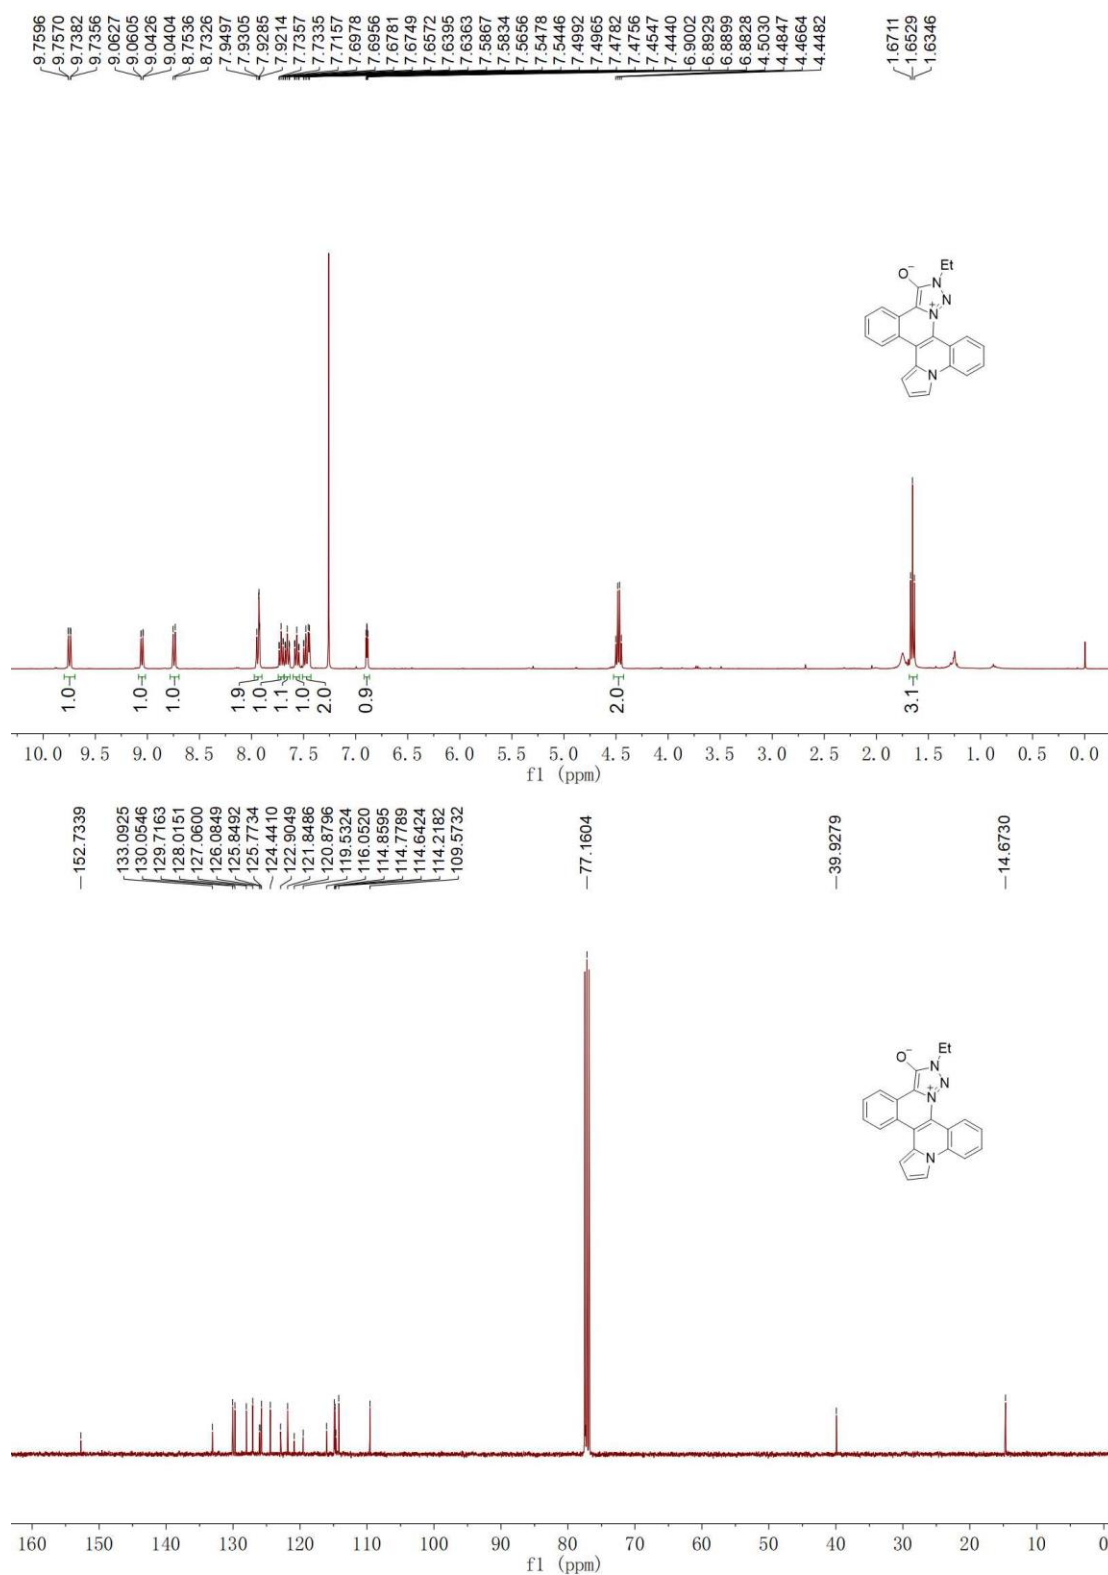



$^1\text{H}$  NMR ( $\text{CDCl}_3$ , 400 MHz) and  $^{13}\text{C}$  NMR ( $\text{CDCl}_3$ , 100 MHz) spectra of **6**

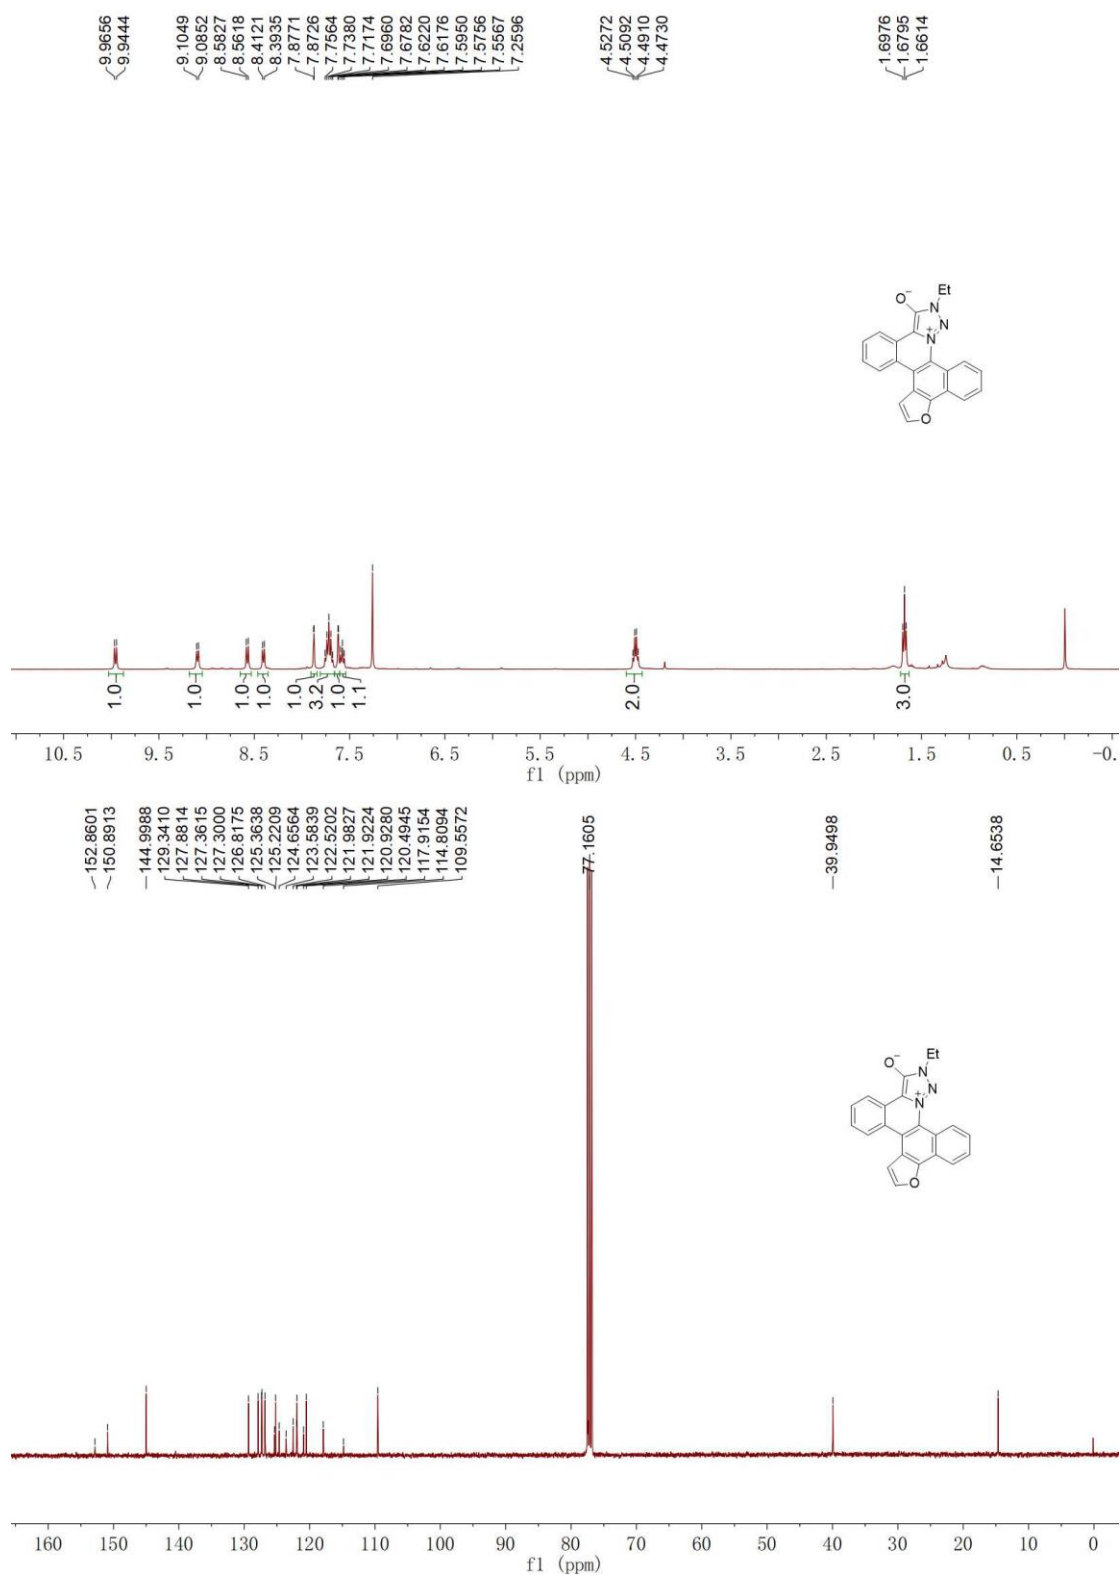

$^1\text{H}$  NMR ( $\text{CDCl}_3$ , 400 MHz) and  $^{13}\text{C}$  NMR ( $\text{CDCl}_3$ , 100 MHz) spectra of **7a**

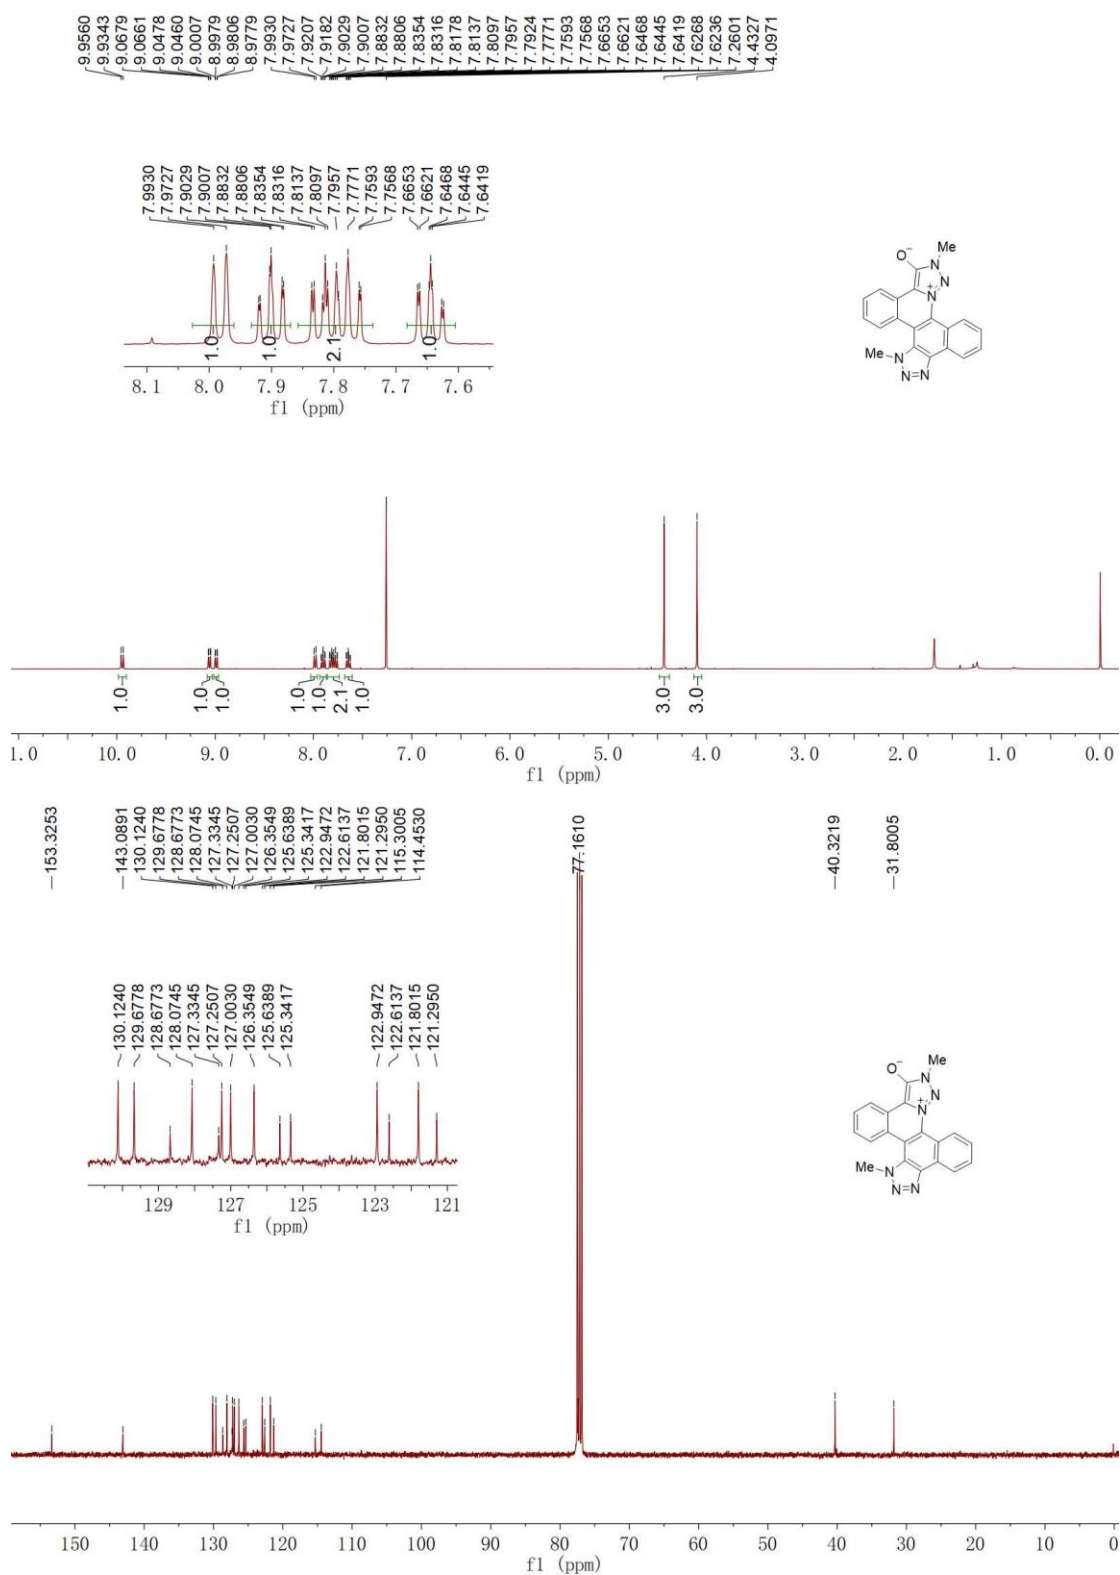

$^1\text{H}$  NMR ( $\text{CDCl}_3$ , 400 MHz) and  $^{13}\text{C}$  NMR ( $\text{CDCl}_3$ , 100 MHz) spectra of **7b**

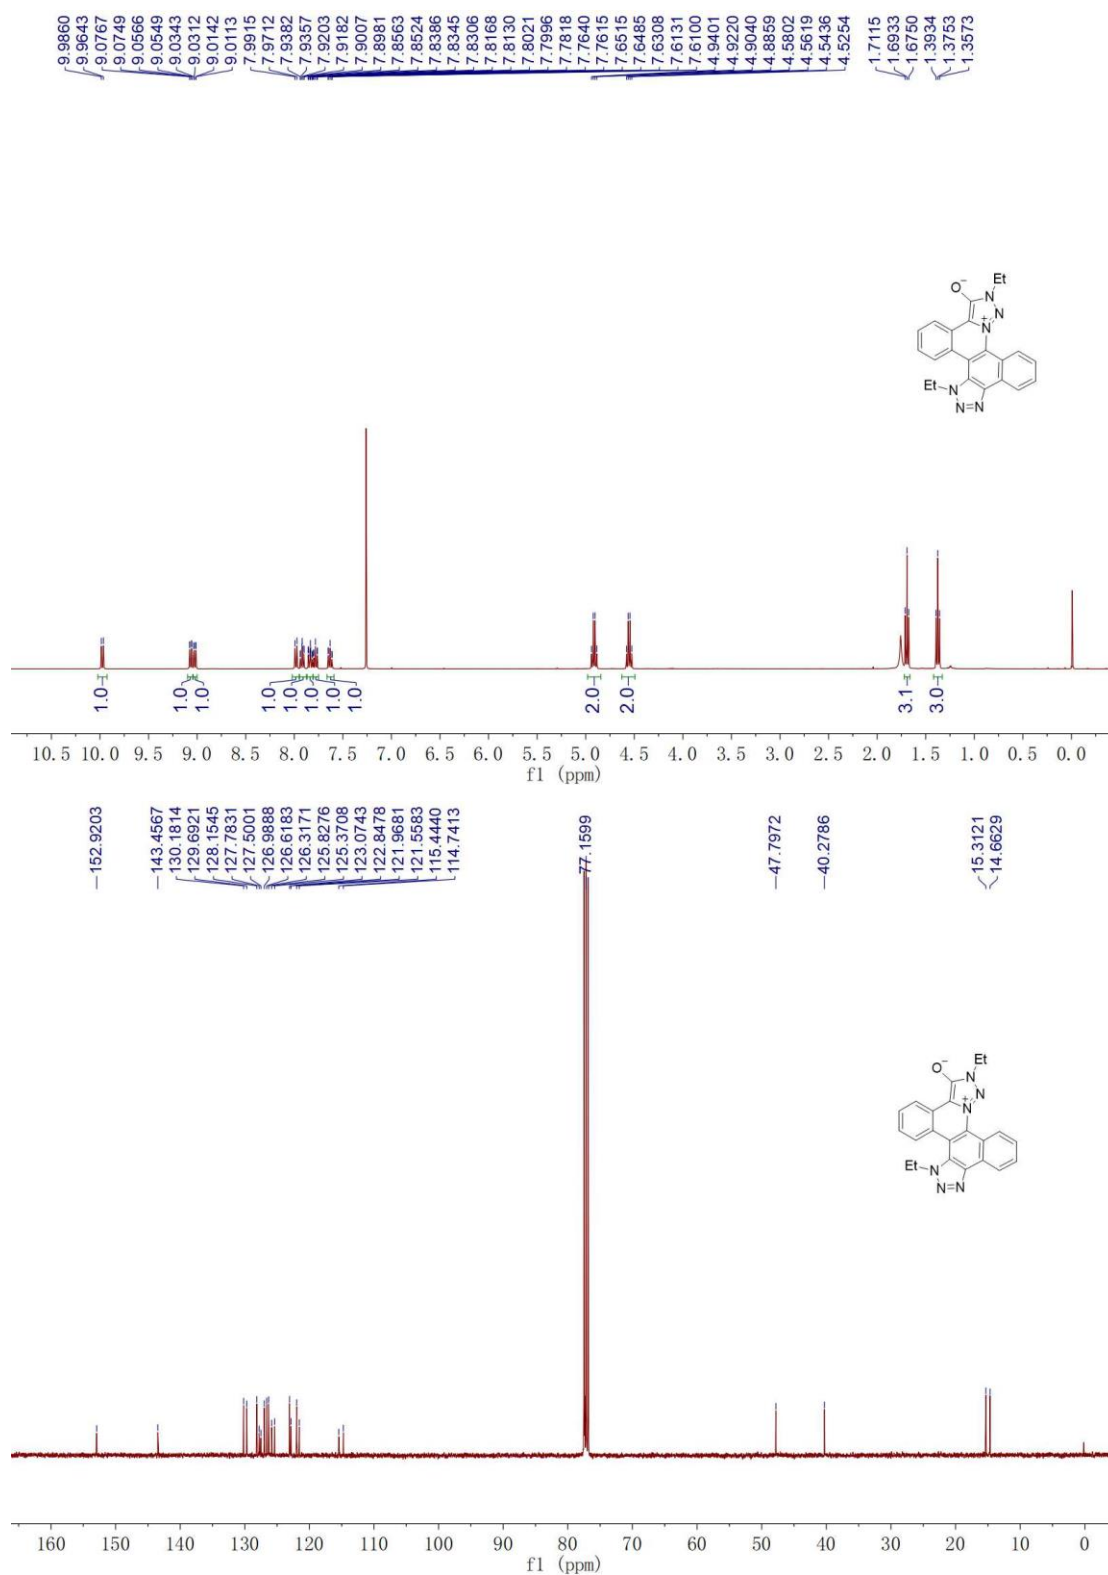

$^1\text{H}$  NMR ( $\text{CDCl}_3$ , 400 MHz) and  $^{13}\text{C}$  NMR ( $\text{CDCl}_3$ , 100 MHz) spectra of **7c**

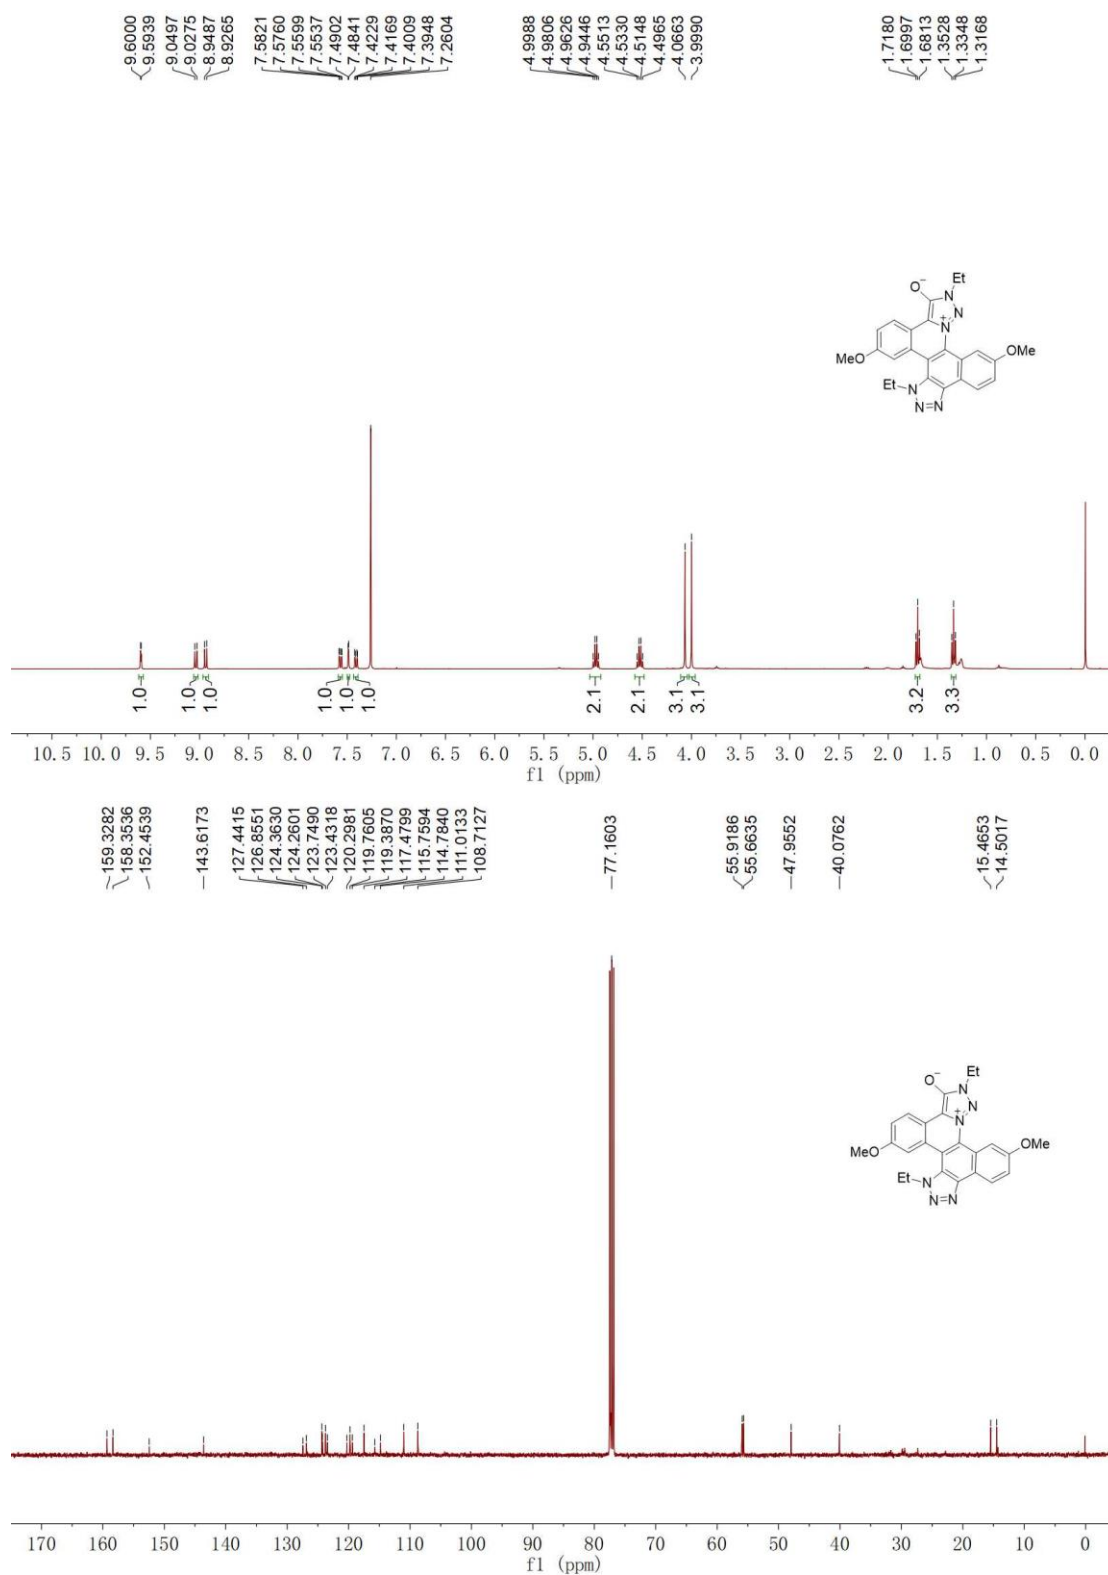

Supplement: d2qo01627c1.pdf [file d2qo01627c1.pdf]
